# Supplementary material for: Metatranscriptomics reveals temperature-driven functional changes in microbiome impacting cheese maturation rate
Source: PubMed Central journal article supplement (PMC4766472; doi:10.1038/srep21871), 2016-02-25
Supplement: srep21871-s1.pdf [file srep21871-s1.pdf]

**Supplementary Material**

**Metatranscriptomics reveals temperature-driven functional changes in microbiome impacting cheese maturation rate**

Francesca De Filippis<sup>1</sup>, Alessandro Genovese<sup>1</sup>, Pasquale Ferranti<sup>1</sup>, Jack A. Gilbert<sup>2,3,4,5,6</sup>, Danilo Ercolini<sup>1\*</sup>

<sup>1</sup>Department of Agricultural Sciences, University of Naples Federico II, Via Università 100, 80055 Portici, Italy

<sup>2</sup>Biosciences Division (BIO), Argonne National Laboratory, Argonne, IL;

<sup>3</sup>Department of Ecology & Evolution, University of Chicago, Chicago, IL;

<sup>4</sup>Department of Surgery, University of Chicago, Chicago, IL;

<sup>5</sup>Institute for Genomic and Systems Biology, University of Chicago, Chicago, IL.;

<sup>6</sup>The Marine Biological Laboratory, Woods Hole, MA.

\*Corresponding author.

Department of Agricultural Sciences, Division of Microbiology, University of Naples Federico II, Via Università 100, 80055 Portici, Italy

Phone: +39 081 2539449. Fax: +39 081 2539407.

*E-mail:* [ercolini@unina.it](mailto:ercolini@unina.it).

**Figure S1 – Cheese core and crust have different microbiota.** Average-linkage clustering based on the Spearman correlation coefficients of the proportion of OTUs belonging to the Firmicutes phylum identified in the samples analysed in the first (A) and second (B) experiment carried out in this study. Only OTUs with abundance > 0.1% in at least 1 sample were included. The color scale represents the scaled abundance of each variable, denoted as Z-score, with red indicating high abundance and blue indicating low abundance. Column bar is coloured according to sample type: red, intermediates of production; blue, cheese core; green, cheese crust. In the sample IDs, the first part indicates the time of ripening (from t0, cheese after brining and drying, to 60 or 30 days of ripening, in the first and second experiment, respectively); CO, core or CR, crust; A, ripening at standard conditions; B, higher temperature; C, lower RH.

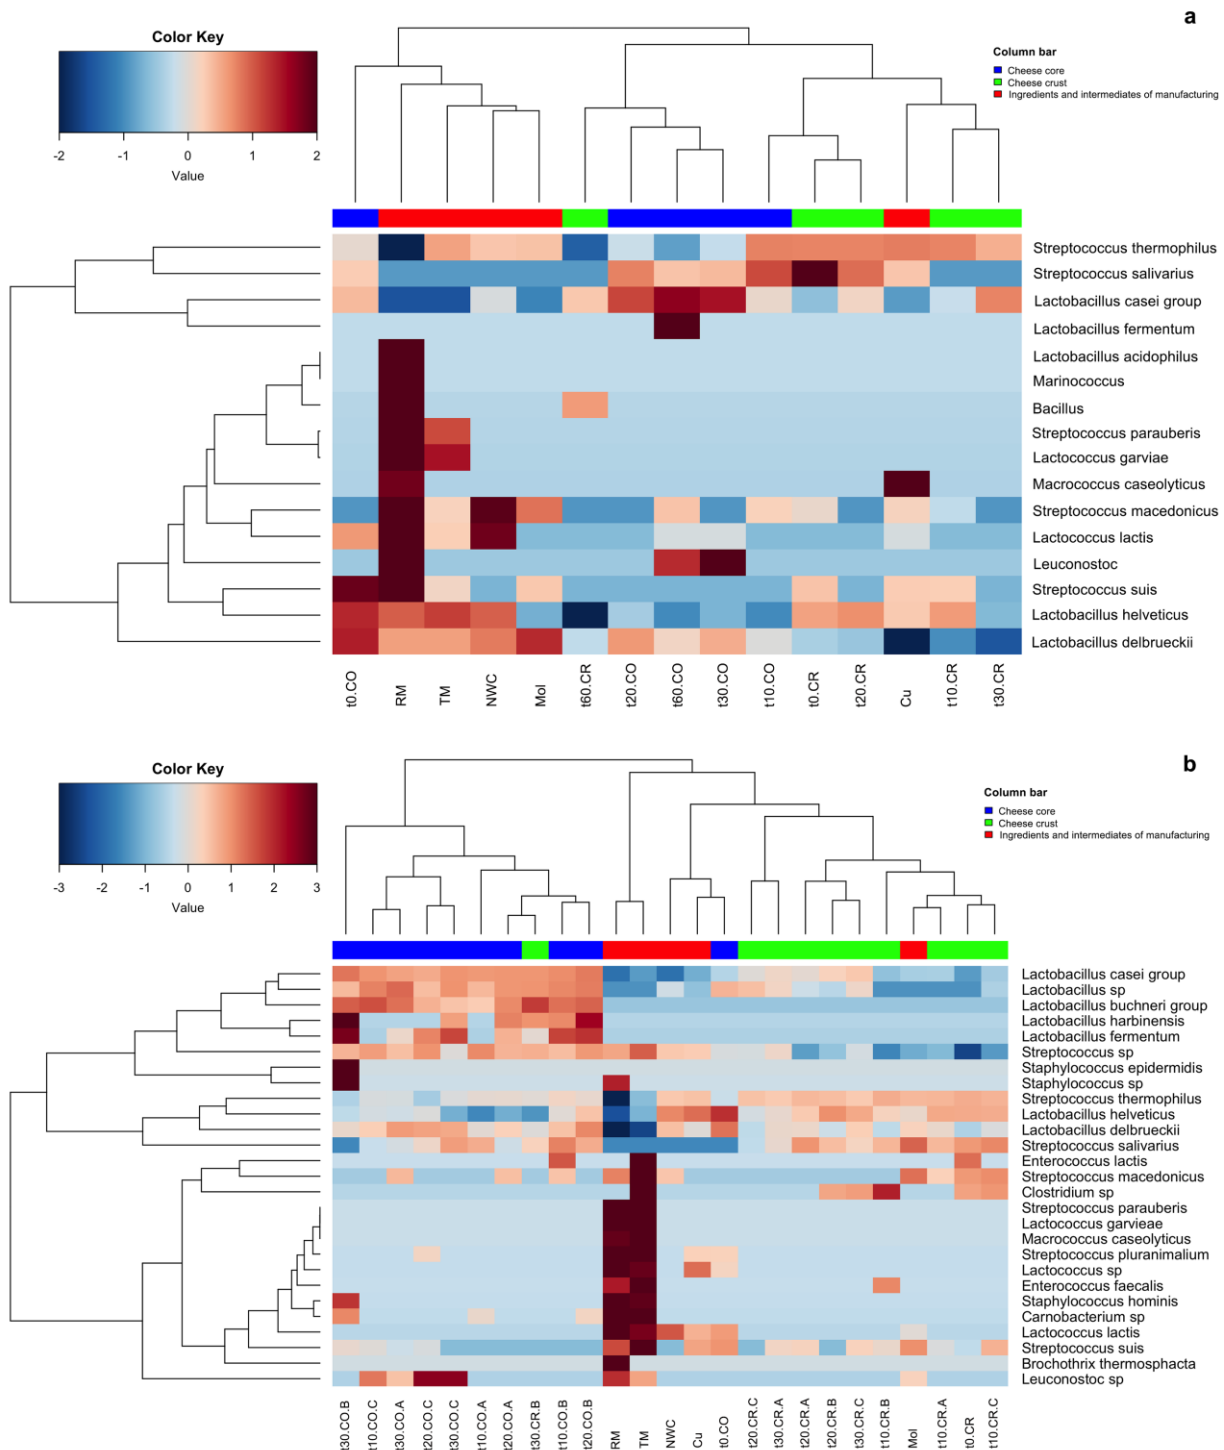

**Figure S2 – Gene expression in galactose catabolism pathways.** Leloir and tagatose 6P pathways with related expression data in the samples of cheese core and crust analyzed in the second experiment. In the sample IDs, the first part indicates the time of ripening (from t0, cheese after brining and drying, to 30 days of ripening); CO, core or CR, crust; A, ripening at standard conditions; B, higher temperature. Only samples from the second experiment are shown.

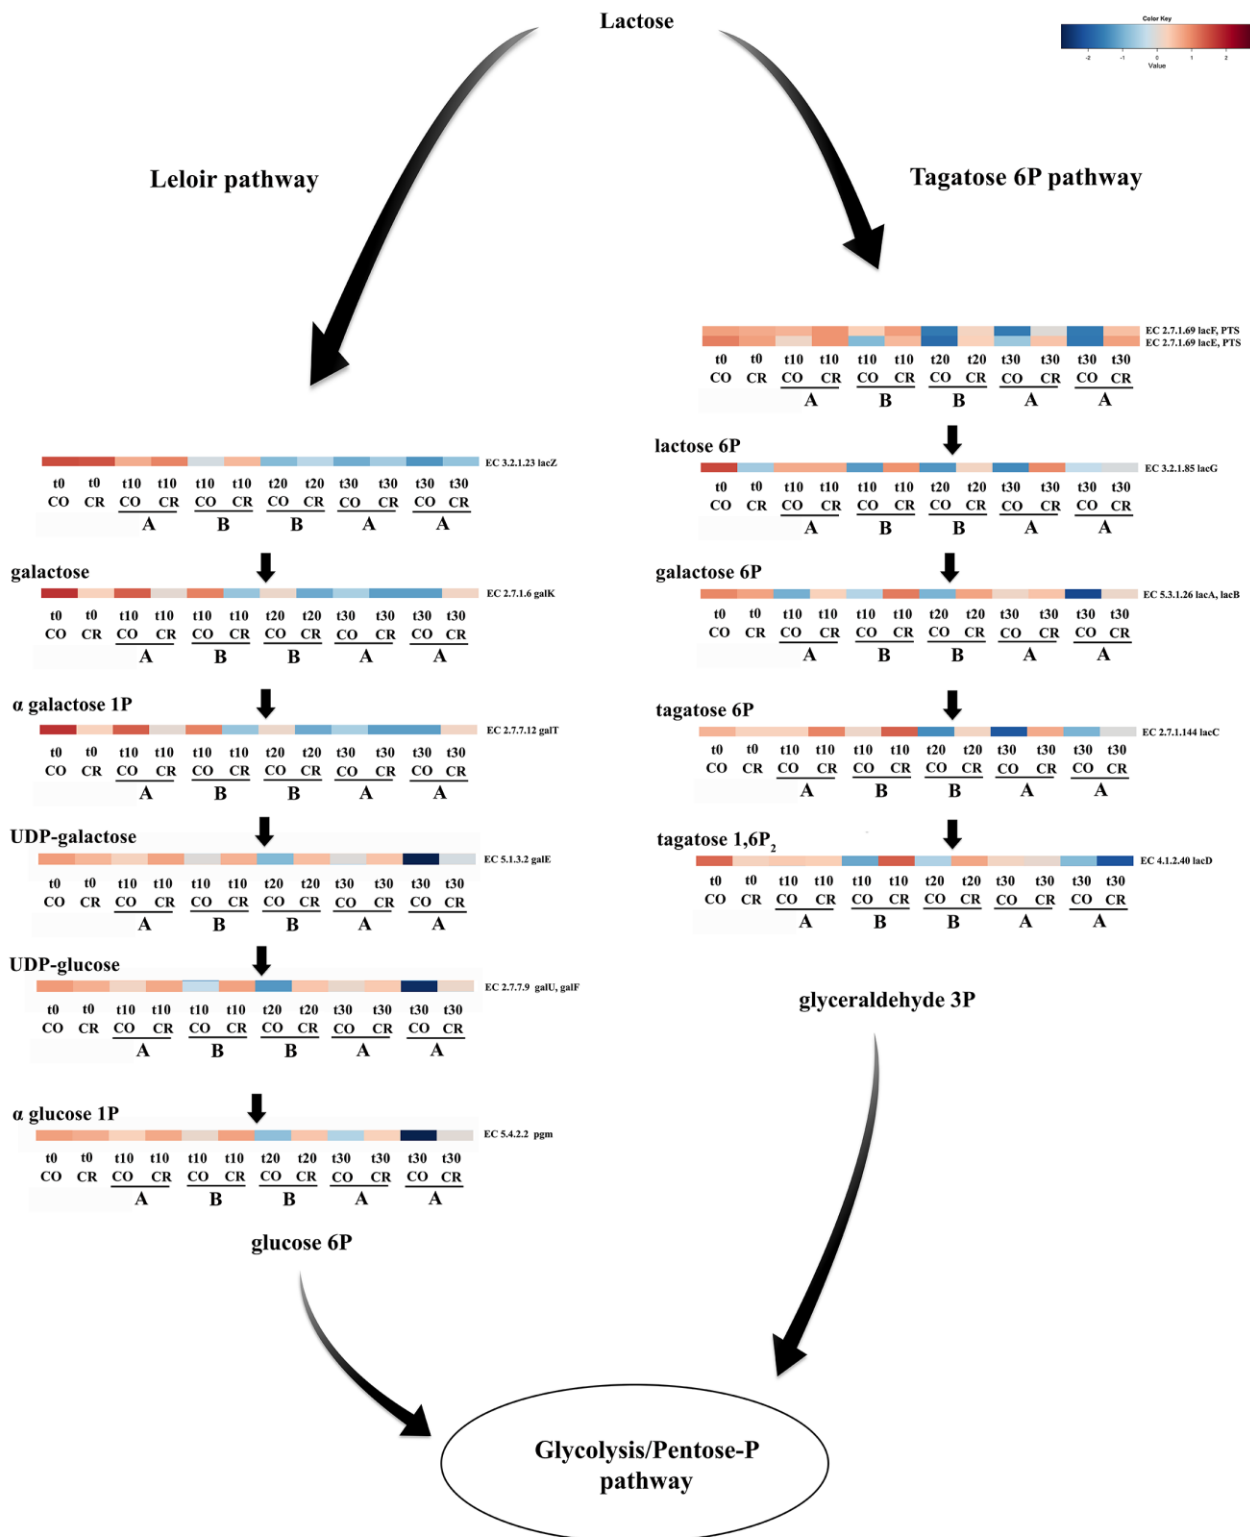

**Figure S3 - Gene expression in pyruvate catabolism pathways.** Acetoin and lactate production from piruvate, with related gene expression data in the samples of cheese core and crust analyzed in the second experiment. Dashed line indicates chemical reaction. Only samples from the second experiment are shown. In the sample IDs, the first part indicates the time of ripening (from t0, cheese after brining and drying, to 30 days of ripening); CO, core or CR, crust; A, ripening at standard conditions; B, higher temperature.

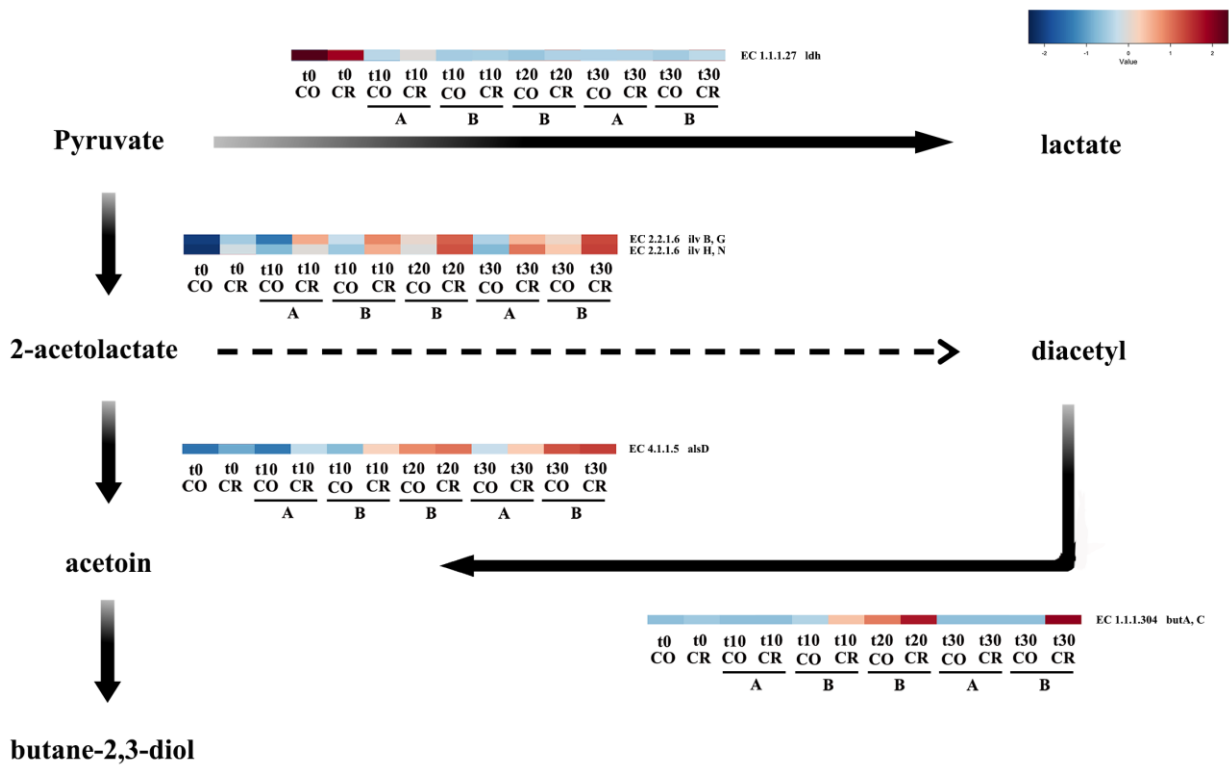

**Figure S4 – Higher temperature increases proteolysis levels.** LC/MS analysis of the pH 4.6 soluble nitrogen fraction from Caciocavallo cheese core at 30 days of ripening. A (dashed line), cheese ripened at standard conditions; B (continuous line), cheese ripened at higher temperature.

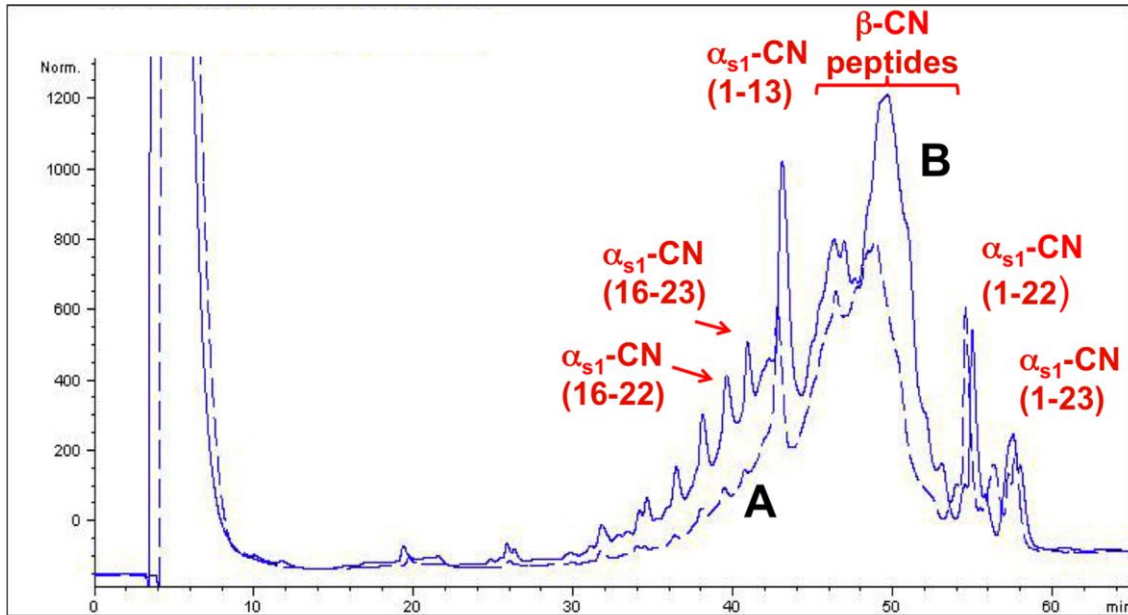

**Table S3.** Viable counts of presumptive lactobacilli and streptococci in the samples analyzed in the second experiment carried out in this study.

| Sample          | Log CFU/g $\pm$ SD      |                           |                        |                        |
|-----------------|-------------------------|---------------------------|------------------------|------------------------|
|                 | Mesophilic lactobacilli | Thermophilic lactobacilli | Mesophilic cocci       | Thermophilic cocci     |
|                 | <i>MRS agar</i> (30°C)  | <i>MRS agar</i> (42°C)    | <i>M17 agar</i> (30°C) | <i>M17 agar</i> (42°C) |
| <b>RM</b>       | 5.17 $\pm$ 0.32         | 5.30 $\pm$ 0.43           | 5.86 $\pm$ 0.22        | 5.26 $\pm$ 0.35        |
| <b>TM</b>       | 4.87 $\pm$ 0.96         | 5.33 $\pm$ 0.38           | 6.11 $\pm$ 0.36        | 4.61 $\pm$ 0.22        |
| <b>NWC</b>      | 5.61 $\pm$ 0.42         | 6.65 $\pm$ 0.62           | 7.30 $\pm$ 0.46        | 5.76 $\pm$ 0.36        |
| <b>Cu</b>       | 5.48 $\pm$ 0.12         | 6.81 $\pm$ 0.23           | 7.30 $\pm$ 0.22        | 7.06 $\pm$ 0.75        |
| <b>Mol</b>      | 5.26 $\pm$ 0.22         | 5.08 $\pm$ 0.35           | 7.48 $\pm$ 0.15        | 7.48 $\pm$ 0.90        |
| <b>t0.CO</b>    | 5.56 $\pm$ 0.24         | 5.48 $\pm$ 0.41           | 7.18 $\pm$ 0.16        | 7.44 $\pm$ 1.16        |
| <b>t0.CR</b>    | 4.27 $\pm$ 0.62         | 5.74 $\pm$ 0.31           | 7.17 $\pm$ 0.78        | 7.44 $\pm$ 0.35        |
| <b>t10.CO.A</b> | 6.05 $\pm$ 0.29         | 5.44 $\pm$ 1.30           | 7.19 $\pm$ 0.63        | 6.22 $\pm$ 0.26        |
| <b>t10.CR.A</b> | 6.57 $\pm$ 0.45         | 5.27 $\pm$ 0.28           | 7.14 $\pm$ 0.28        | 5.25 $\pm$ 0.39        |
| <b>t10.CO.B</b> | 6.91 $\pm$ 0.17         | 6.58 $\pm$ 0.55           | 7.14 $\pm$ 0.22        | 6.45 $\pm$ 0.73        |
| <b>t10.CR.B</b> | 6.63 $\pm$ 0.15         | 4.36 $\pm$ 0.31           | 7.48 $\pm$ 0.26        | 5.31 $\pm$ 0.64        |
| <b>t10.CO.C</b> | 6.7 $\pm$ 0.36          | 4.68 $\pm$ 0.36           | 6.84 $\pm$ 0.32        | 5.65 $\pm$ 0.45        |
| <b>t10.CR.C</b> | 5.26 $\pm$ 0.22         | 4.53 $\pm$ 0.25           | 7.50 $\pm$ 0.48        | 5.32 $\pm$ 0.15        |
| <b>t20.CO.A</b> | 6.61 $\pm$ 0.13         | 5.84 $\pm$ 0.60           | 7.58 $\pm$ 0.84        | 5.83 $\pm$ 0.32        |
| <b>t20.CR.A</b> | 5.66 $\pm$ 0.57         | 4.20 $\pm$ 0.21           | 7.44 $\pm$ 0.37        | 6.33 $\pm$ 0.69        |
| <b>t20.CO.B</b> | 8.22 $\pm$ 0.11         | 6.49 $\pm$ 0.81           | 7.42 $\pm$ 0.18        | 6.45 $\pm$ 0.21        |
| <b>t20.CR.B</b> | 7.32 $\pm$ 0.22         | 4.15 $\pm$ 0.07           | 7.34 $\pm$ 0.25        | 6.37 $\pm$ 0.77        |
| <b>t20.CO.C</b> | 8.01 $\pm$ 0.52         | 5.69 $\pm$ 0.24           | 7.48 $\pm$ 0.26        | 5.55 $\pm$ 0.95        |
| <b>t20.CR.C</b> | 5.21 $\pm$ 0.30         | 5.35 $\pm$ 0.22           | 7.71 $\pm$ 0.96        | 5.54 $\pm$ 0.86        |
| <b>t30.CO.A</b> | 7.34 $\pm$ 0.25         | 5.16 $\pm$ 0.98           | 7.15 $\pm$ 0.65        | 5.46 $\pm$ 1.01        |
| <b>t30.CR.A</b> | 7.60 $\pm$ 0.23         | 5.05 $\pm$ 0.93           | 6.58 $\pm$ 0.36        | 6.30 $\pm$ 0.61        |
| <b>t30.CO.B</b> | 8.87 $\pm$ 0.29         | 4.81 $\pm$ 0.30           | 6.40 $\pm$ 0.28        | 5.40 $\pm$ 0.32        |
| <b>t30.CR.B</b> | 7.82 $\pm$ 0.75         | 3.33 $\pm$ 0.28           | 6.91 $\pm$ 0.95        | 3.61 $\pm$ 0.89        |
| <b>t30.CO.C</b> | 6.71 $\pm$ 0.26         | 4.72 $\pm$ 1.36           | 7.30 $\pm$ 1.20        | 4.40 $\pm$ 0.77        |
| <b>t30.CR.C</b> | 4.66 $\pm$ 0.33         | 5.35 $\pm$ 0.22           | 7.38 $\pm$ 0.39        | 4.29 $\pm$ 0.29        |

Values are reported as mean  $\pm$  standard deviation (SD) of three determinations.

**Table S4.** KEGG genes differentially expressed\* between cheese core samples ripened in standard condition and at higher temperature.

| KEGG genes                                                                                                                                                    | log <sub>2</sub> Fold Change | Adjusted P value |
|---------------------------------------------------------------------------------------------------------------------------------------------------------------|------------------------------|------------------|
| Environmentalinformationprocessing;Membranetransport;Ctransporters[PATH:ko02010];aapQ.bztB;generalL-aminoacidtransportsystempermeaseprotein                   | -5.79445058                  | 0.021004259      |
| Environmentalinformationprocessing;Membranetransport;Ctransporters[PATH:ko02010];ABC.FEV.S;ironcomplextransportsystemssubstrate-bindingprotein                | -5.825832424                 | 0.000379778      |
| Environmentalinformationprocessing;Membranetransport;Ctransporters[PATH:ko02010];ABC.GLN1.A;putativeglutaminetransportsystemATP-bindingprotein[EC:3.6.3.-]    | 0.827662713                  | 0.033036164      |
| Environmentalinformationprocessing;Membranetransport;Ctransporters[PATH:ko02010];ABC.VB12.S1.btuF;vitaminB12transportsystemssubstrate-bindingprotein          | -6.041019046                 | 0.02302363       |
| Environmentalinformationprocessing;Membranetransport;Ctransporters[PATH:ko02010];afuC.fbpC;iron(III)transportsystemATP-bindingprotein[EC:3.6.3.30]            | -5.042539965                 | 0.020748409      |
| Environmentalinformationprocessing;Membranetransport;Ctransporters[PATH:ko02010];araF;L-arabinosetransportsystemssubstrate-bindingprotein                     | -4.699202506                 | 0.043755579      |
| Environmentalinformationprocessing;Membranetransport;Ctransporters[PATH:ko02010];artM;argininetransportsystempermeaseprotein                                  | -5.162185444                 | 0.04356273       |
| Environmentalinformationprocessing;Membranetransport;Ctransporters[PATH:ko02010];bioY;biotintransportsystemssubstrate-specificcomponent                       | -1.557141374                 | 0.017244007      |
| Environmentalinformationprocessing;Membranetransport;Ctransporters[PATH:ko02010];dppB;dipeptidetransportsystempermeaseprotein                                 | -6.360916658                 | 3.08E-05         |
| Environmentalinformationprocessing;Membranetransport;Ctransporters[PATH:ko02010];dppD;dipeptidetransportsystemATP-bindingprotein                              | -5.020346936                 | 0.014271914      |
| Environmentalinformationprocessing;Membranetransport;Ctransporters[PATH:ko02010];gspL;generalsecretionpathwayproteinL                                         | -5.162975173                 | 0.044283932      |
| Environmentalinformationprocessing;Membranetransport;Ctransporters[PATH:ko02010];livM;branched-chainaminoacidtransportsystempermeaseprotein                   | -5.761707722                 | 0.000730056      |
| Environmentalinformationprocessing;Membranetransport;Ctransporters[PATH:ko02010];malE;maltose/maltodextrintransportsystemssubstrate-bindingprotein            | -4.394973416                 | 0.018152474      |
| Environmentalinformationprocessing;Membranetransport;Ctransporters[PATH:ko02010];malF;maltose/maltodextrintransportsystempermeaseprotein                      | -4.078495417                 | 0.042930947      |
| Environmentalinformationprocessing;Membranetransport;Ctransporters[PATH:ko02010];malG;maltose/maltodextrintransportsystempermeaseprotein                      | -3.617921368                 | 0.037642814      |
| Environmentalinformationprocessing;Membranetransport;Ctransporters[PATH:ko02010];malK.mtlK.thuK;multiplesugartransportsystemATP-bindingprotein[EC:3.6.3.-]    | -4.686140514                 | 0.019589753      |
| Environmentalinformationprocessing;Membranetransport;Ctransporters[PATH:ko02010];mglA;methyl-galactosidetransportsystemATP-bindingprotein[EC:3.6.3.17]        | -5.520371977                 | 0.040303703      |
| Environmentalinformationprocessing;Membranetransport;Ctransporters[PATH:ko02010];mglB;methyl-galactosidetransportsystemssubstrate-bindingprotein              | -5.802875091                 | 0.029813011      |
| Environmentalinformationprocessing;Membranetransport;Ctransporters[PATH:ko02010];msbA;ATP-bindingcassette.subfamilyB.bacterialMsbA[EC:3.6.3.-]                | -6.223001057                 | 0.005758234      |
| Environmentalinformationprocessing;Membranetransport;Ctransporters[PATH:ko02010];msmX.msmK.malK.sugC.ggtA.msiK;multiplesugartransportsystemATP-bindingprotein | -5.08078914                  | 0.000571588      |
| Environmentalinformationprocessing;Membranetransport;Ctransporters[PATH:ko02010];nodI;lipooligosaccharidetransportsystemATP-bindingprotein                    | -5.508787084                 | 0.002031792      |
| Environmentalinformationprocessing;Membranetransport;Ctransporters[PATH:ko02010];nodJ;lipooligosaccharidetransportsystempermeaseprotein                       | -4.923850342                 | 0.008424869      |

|                                                                                                                                                                      |              |             |
|----------------------------------------------------------------------------------------------------------------------------------------------------------------------|--------------|-------------|
| Environmentalinformationprocessing;Membranetransport;Ctransporters[PATH:ko02010];opuBD;osmoprotectanttransportssystempermeaseprotein                                 | -3.826399874 | 0.012048496 |
| Environmentalinformationprocessing;Membranetransport;Ctransporters[PATH:ko02010];opuC;osmoprotectanttransportssystemsubstrate-bindingprotein                         | -3.905138751 | 0.010739859 |
| Environmentalinformationprocessing;Membranetransport;Ctransporters[PATH:ko02010];phnC;phosphonatetransportssystemATP-bindingprotein[EC:3.6.3.28]                     | -4.855635021 | 0.000308086 |
| Environmentalinformationprocessing;Membranetransport;Ctransporters[PATH:ko02010];phnD;phosphonatetransportssystemsubstrate-bindingprotein                            | -5.147908585 | 3.13E-05    |
| Environmentalinformationprocessing;Membranetransport;Ctransporters[PATH:ko02010];phnE;phosphonatetransportssystempermeaseprotein                                     | -4.682026418 | 1.46E-05    |
| Environmentalinformationprocessing;Membranetransport;Ctransporters[PATH:ko02010];proV;glycinebetaine/prolinetransportssystemATP-bindingprotein[EC:3.6.3.32]          | -4.342908887 | 7.99E-06    |
| Environmentalinformationprocessing;Membranetransport;Ctransporters[PATH:ko02010];proW;glycinebetaine/prolinetransportssystempermeaseprotein                          | -4.533502532 | 2.35E-05    |
| Environmentalinformationprocessing;Membranetransport;Ctransporters[PATH:ko02010];proX;glycinebetaine/prolinetransportssystemsubstrate-bindingprotein                 | -4.50135696  | 2.04E-05    |
| Environmentalinformationprocessing;Membranetransport;Ctransporters[PATH:ko02010];pstB;phosphatetransportssystemATP-bindingprotein[EC:3.6.3.27]                       | 0.767093067  | 0.02975298  |
| Environmentalinformationprocessing;Membranetransport;Ctransporters[PATH:ko02010];PTS-Aga-EIIA.agaF;PTSsystem.N-acetylgalactosamine-specificIIAcomponent[EC:2.7.1.69] | -4.846802103 | 3.93E-05    |
| Environmentalinformationprocessing;Membranetransport;Ctransporters[PATH:ko02010];PTS-Bgl-EIIB.bglF;PTSsystem.beta-glucosides-specificIIBcomponent[EC:2.7.1.69]       | -4.046032474 | 9.44E-05    |
| Environmentalinformationprocessing;Membranetransport;Ctransporters[PATH:ko02010];PTS-Cel-EIIA.celC;PTSsystem.cellobiose-specificIIAcomponent[EC:2.7.1.69]            | -5.152633964 | 7.50E-07    |
| Environmentalinformationprocessing;Membranetransport;Ctransporters[PATH:ko02010];PTS-Cel-EIIB.celA;PTSsystem.cellobiose-specificIIBcomponent[EC:2.7.1.69]            | -4.698040454 | 5.05E-06    |
| Environmentalinformationprocessing;Membranetransport;Ctransporters[PATH:ko02010];PTS-Cel-EIIC.celB;PTSsystem.cellobiose-specificIICcomponent                         | -2.463007798 | 0.00032332  |
| Environmentalinformationprocessing;Membranetransport;Ctransporters[PATH:ko02010];PTS-EI.PTSI.ptsI;phosphotransferasesystem.enzymeI.PtsI[EC:2.7.3.9]                  | -6.120948801 | 3.02E-05    |
| Environmentalinformationprocessing;Membranetransport;Ctransporters[PATH:ko02010];PTS-Fru-EIIA.fruB;PTSsystem.fructose-specificIIAcomponent[EC:2.7.1.69]              | -5.587499802 | 0.00039653  |
| Environmentalinformationprocessing;Membranetransport;Ctransporters[PATH:ko02010];PTS-Fru-EIIB.fruA;PTSsystem.fructose-specificIIBcomponent[EC:2.7.1.69]              | -5.588803896 | 0.00039653  |
| Environmentalinformationprocessing;Membranetransport;Ctransporters[PATH:ko02010];PTS-Fru-EIIC.fruA;PTSsystem.fructose-specificIICcomponent                           | -5.588803891 | 0.00039653  |
| Environmentalinformationprocessing;Membranetransport;Ctransporters[PATH:ko02010];PTS-Gat-EIIC.gatC;PTSsystem.galactitol-specificIICcomponent                         | -3.263125977 | 0.018152474 |
| Environmentalinformationprocessing;Membranetransport;Ctransporters[PATH:ko02010];PTS-Man-EIID.manZ;PTSsystem.mannose-specificIIDcomponent                            | 1.688426934  | 0.029533322 |
| Environmentalinformationprocessing;Membranetransport;Ctransporters[PATH:ko02010];PTS-Ula-EIIA.ulaC.sgaA;PTSsystem.ascorbate-specificIIAcomponent[EC:2.7.1.69]        | -5.441430331 | 1.37E-05    |
| Environmentalinformationprocessing;Membranetransport;Ctransporters[PATH:ko02010];PTS-Ula-EIIB.ulaB.sgaB;PTSsystem.ascorbate-specificIIBcomponent[EC:2.7.1.69]        | -4.012856339 | 0.000231184 |
| Environmentalinformationprocessing;Membranetransport;Ctransporters[PATH:ko02010];PTS-Ula-EIIC.ulaA.sgaT;PTSsystem.ascorbate-specificIICcomponent                     | -5.228916806 | 5.96E-06    |



|                                                                                                                                                                    |              |             |
|--------------------------------------------------------------------------------------------------------------------------------------------------------------------|--------------|-------------|
| Environmentalinformationprocessing;Membranetransport;Ctransporters[PATH:ko02010];rbsA;ribosetransportsystemATP-bindingprotein[EC:3.6.3.17]                         | -4.812403961 | 9.48E-05    |
| Environmentalinformationprocessing;Membranetransport;Ctransporters[PATH:ko02010];rbsB;ribosetransportsystemssubstrate-bindingprotein                               | -5.604951479 | 2.42E-07    |
| Environmentalinformationprocessing;Membranetransport;Ctransporters[PATH:ko02010];rbsC;ribosetransportsystempermeaseprotein                                         | -5.017029039 | 1.30E-05    |
| Environmentalinformationprocessing;Membranetransport;Ctransporters[PATH:ko02010];rbsD;D-ribosepyranase[EC:5.-.-.-]                                                 | -4.680373806 | 0.000234784 |
| Environmentalinformationprocessing;Membranetransport;Ctransporters[PATH:ko02010];secE;preproteintranslocasesubunitSecE                                             | 1.14660634   | 0.012808524 |
| Environmentalinformationprocessing;Membranetransport;Ctransporters[PATH:ko02010];secF;preproteintranslocasesubunitSecF                                             | -4.676083612 | 0.032725985 |
| Environmentalinformationprocessing;Membranetransport;Ctransporters[PATH:ko02010];tagG;teichoicacidtransportsystempermeaseprotein                                   | -5.653678072 | 3.55E-07    |
| Environmentalinformationprocessing;Membranetransport;Ctransporters[PATH:ko02010];tagH;teichoicacidtransportsystemATP-bindingprotein[EC:3.6.3.40]                   | -4.624431029 | 1.55E-05    |
| Environmentalinformationprocessing;Membranetransport;Ctransporters[PATH:ko02010];ugpA;sn-glycerol3-phosphatetransportsystempermeaseprotein                         | -5.240890087 | 2.53E-06    |
| Environmentalinformationprocessing;Membranetransport;Ctransporters[PATH:ko02010];ugpB;sn-glycerol3-phosphatetransportsystemssubstrate-bindingprotein               | -4.806639566 | 3.71E-07    |
| Environmentalinformationprocessing;Membranetransport;Ctransporters[PATH:ko02010];ugpC;sn-glycerol3-phosphatetransportsystemATP-bindingprotein[EC:3.6.3.20]         | -5.28324773  | 5.02E-05    |
| Environmentalinformationprocessing;Membranetransport;Ctransporters[PATH:ko02010];ugpE;sn-glycerol3-phosphatetransportsystempermeaseprotein                         | -4.922403666 | 1.17E-05    |
| Environmentalinformationprocessing;Membranetransport;Ctransporters[PATH:ko02010];virD4.lvhD4;typeIVsecretionsystemproteinVirD4                                     | -5.371159934 | 0.007319264 |
| Environmentalinformationprocessing;Membranetransport;Ctransporters[PATH:ko02010];xylG;D-xylosetransportsystemATP-bindingprotein[EC:3.6.3.17]                       | -5.134973505 | 0.02302363  |
| Environmentalinformationprocessing;Membranetransport;Ctransporters[PATH:ko02010];yojI;putativeATP-bindingcassettetransporter                                       | -5.794042408 | 0.022225319 |
| Environmentalinformationprocessing;Signaltransduction;HIF-1signalingpathway[PATH:ko04066];ENO.eno;enolase[EC:4.2.1.11]                                             | -5.950546634 | 6.12E-05    |
| Environmentalinformationprocessing;Signaltransduction;HIF-1signalingpathway[PATH:ko04066];GAPDH.gapA;glyceraldehyde3-phosphatedehydrogenase[EC:1.2.1.12]           | -5.458656315 | 0.000134338 |
| Environmentalinformationprocessing;Signaltransduction;PI3K-Aktsignalingpathway[PATH:ko04151];htpG.HSP90A;molecularchaperoneHtpG                                    | -5.070633139 | 0.037642814 |
| Environmentalinformationprocessing;Signaltransduction;Two-componentsystem[PATH:ko02020];agrA;two-componentsystem.AgrAfamily.responseregulatorAgrA                  | -3.436225515 | 0.000243456 |
| Environmentalinformationprocessing;Signaltransduction;Two-componentsystem[PATH:ko02020];agrC;two-componentsystem.AgrAfamily.sensorhistidinekinaseAgrC[EC:2.7.13.-] | -3.668420447 | 2.98E-05    |
| Environmentalinformationprocessing;Signaltransduction;Two-componentsystem[PATH:ko02020];atoE;short-chainfattyacidtransporter                                       | -5.163257353 | 0.043141763 |
| Environmentalinformationprocessing;Signaltransduction;Two-componentsystem[PATH:ko02020];cheR;chemotaxisproteinmethyltransferaseCheR[EC:2.1.1.80]                   | -6.032709365 | 0.016092491 |
| Environmentalinformationprocessing;Signaltransduction;Two-componentsystem[PATH:ko02020];ciaH;two-componentsystem.OmpRfamily.sensorhistidinekinaseCiaH[EC:2.7.13.3] | -5.148019687 | 7.83E-05    |
| Environmentalinformationprocessing;Signaltransduction;Two-componentsystem[PATH:ko02020];ciaR;two-componentsystem.OmpRfamily.responseregulatorCiaR                  | -3.678644298 | 3.62E-06    |
| Environmentalinformationprocessing;Signaltransduction;Two-componentsystem[PATH:ko02020];citC;[citrate(pro-3S)-lyase]ligase[EC:6.2.1.22]                            | -6.306858006 | 2.32E-08    |

|                                                                                                                                                                                                         |              |             |
|---------------------------------------------------------------------------------------------------------------------------------------------------------------------------------------------------------|--------------|-------------|
| Environmental information processing; Signal transduction; Two-component system [PATH:ko02020]; citD; citrate lyase subunit gamma (acyl carrier protein)                                                | -5.161523661 | 7.19E-05    |
| Environmental information processing; Signal transduction; Two-component system [PATH:ko02020]; citE; citrate lyase subunit beta/citryl-CoA lyase [EC:4.1.3.34]                                         | -5.705675918 | 2.75E-07    |
| Environmental information processing; Signal transduction; Two-component system [PATH:ko02020]; citF; citrate lyase subunit alpha/citrate CoA-transferase [EC:2.8.3.10]                                 | -6.662554821 | 9.13E-08    |
| Environmental information processing; Signal transduction; Two-component system [PATH:ko02020]; citXG; holo-ACPsynthase/triphosphoribosyl-dephospho-CoA synthase [EC:2.7.7.612.4.2.52]                  | -6.569294057 | 2.23E-08    |
| Environmental information processing; Signal transduction; Two-component system [PATH:ko02020]; cusA, silA; Cu(I)/Ag(I) efflux system membrane protein CusA/SilA                                        | -5.136698074 | 0.024592108 |
| Environmental information processing; Signal transduction; Two-component system [PATH:ko02020]; cydA; cytochrome d ubiquinol oxidase subunit I [EC:1.10.3.-]                                            | -5.064875327 | 1.51E-05    |
| Environmental information processing; Signal transduction; Two-component system [PATH:ko02020]; cydB; cytochrome d ubiquinol oxidase subunit II [EC:1.10.3.-]                                           | -5.137486528 | 1.48E-06    |
| Environmental information processing; Signal transduction; Two-component system [PATH:ko02020]; degP, htrA; serine protease Do [EC:3.4.21.107]                                                          | -6.579035273 | 1.53E-05    |
| Environmental information processing; Signal transduction; Two-component system [PATH:ko02020]; E2.3.1.9.atoB; acetyl-CoA acetyltransferase [EC:2.3.1.9]                                                | -3.373422428 | 0.00346328  |
| Environmental information processing; Signal transduction; Two-component system [PATH:ko02020]; frdA; fumarate reductase flavoprotein subunit [EC:1.3.5.4]                                              | -3.39479139  | 0.012913123 |
| Environmental information processing; Signal transduction; Two-component system [PATH:ko02020]; kdpA; K <sup>+</sup> -transporting ATPase ATPase A chain [EC:3.6.3.12]                                  | -7.220993578 | 0.004572006 |
| Environmental information processing; Signal transduction; Two-component system [PATH:ko02020]; lrgA; holin-like protein                                                                                | -4.837480365 | 0.000430229 |
| Environmental information processing; Signal transduction; Two-component system [PATH:ko02020]; lrgB; holin-like protein LrgB                                                                           | -6.39764061  | 0.000312268 |
| Environmental information processing; Signal transduction; Two-component system [PATH:ko02020]; malR; two-component system. CitB family. response regulator MalR                                        | -5.823963576 | 0.001678448 |
| Environmental information processing; Signal transduction; Two-component system [PATH:ko02020]; mcp; methyl-accepting chemotaxis protein                                                                | -4.13974575  | 0.043106084 |
| Environmental information processing; Signal transduction; Two-component system [PATH:ko02020]; mdtC; RND superfamily multidrug transport protein MdtC                                                  | -12.23880014 | 0.004523313 |
| Environmental information processing; Signal transduction; Two-component system [PATH:ko02020]; narX; two-component system. NarL family. nitrate/nitrite sensor histidine kinase NarX [EC:2.7.13.3]     | -11.80991106 | 0.016700344 |
| Environmental information processing; Signal transduction; Two-component system [PATH:ko02020]; phoB1, phoP; two-component system. OmpR family. alkaline phosphatase synthesis response regulator PhoP  | -6.000304319 | 2.31E-07    |
| Environmental information processing; Signal transduction; Two-component system [PATH:ko02020]; phoR; two-component system. OmpR family. phosphate regulator sensor histidine kinase PhoR [EC:2.7.13.3] | -5.97650818  | 2.36E-08    |
| Environmental information processing; Signal transduction; Two-component system [PATH:ko02020]; rstB; two-component system. OmpR family. sensor histidine kinase RstB [EC:2.7.13.3]                     | -8.54976537  | 0.005903541 |
| Environmental information processing; Signal transduction; Two-component system [PATH:ko02020]; trg; methyl-accepting chemotaxis protein III. ribose and galactose sensor receptor                      | -13.0990089  | 0.001572765 |

|                                                                                                                                                                                                    |              |             |
|----------------------------------------------------------------------------------------------------------------------------------------------------------------------------------------------------|--------------|-------------|
| Environmental information processing; Signal transduction; Two-component system [PATH:ko02020]; uhpC; MFSt transporter.OPA family. sugar phosphate sensor protein UhpC                             | -11.76854005 | 0.002995451 |
| Environmental information processing; Signal transduction; Two-component system [PATH:ko02020]; uhpT; MFSt transporter.OPA family. hexose phosphate transport protein UhpT                         | -13.30306937 | 0.001164129 |
| Environmental information processing; Signal transduction; Two-component system [PATH:ko02020]; vraR; two-component system. NarL family. vancomycin resistance associated responder regulator VraR | -8.025730609 | 0.01063941  |
| Environmental information processing; Signal transduction; Two-component system [PATH:ko02020]; yufL.malK; two-component system. CitB family. sensor histidine kinase MalK [EC:2.7.13.3]           | -5.484163521 | 0.048249327 |
| Genetic information and processing Transcription; Aminoacyl-tRNA biosynthesis [PATH:ko00970]; EARS.gltX; glutamyl-tRNA synthetase [EC:6.1.1.17]                                                    | -8.769486459 | 0.039283267 |
| Genetic information and processing Transcription; Aminoacyl-tRNA biosynthesis [PATH:ko00970]; gltX; nondiscriminating glutamyl-tRNA synthetase [EC:6.1.1.24]                                       | -1.073337721 | 0.047440494 |
| Genetic information and processing Transcription; Aminoacyl-tRNA biosynthesis [PATH:ko00970]; glyQ; glycyl-tRNA synthetase alpha chain [EC:6.1.1.14]                                               | 0.973594969  | 0.011586317 |
| Genetic information and processing Transcription; Aminoacyl-tRNA biosynthesis [PATH:ko00970]; glyS; glycyl-tRNA synthetase beta chain [EC:6.1.1.14]                                                | -6.116192416 | 8.78E-05    |
| Genetic information and processing Transcription; Aminoacyl-tRNA biosynthesis [PATH:ko00970]; MTFMT.fmt; methionyl-tRNA formyltransferase [EC:2.1.2.9]                                             | 0.89200961   | 0.002995451 |
| Genetic information and processing Transcription; Aminoacyl-tRNA biosynthesis [PATH:ko00970]; QARS.glnS; glutamyl-tRNA synthetase [EC:6.1.1.18]                                                    | -11.75388851 | 0.001912743 |
| Genetic information and processing Transcription; Aminoacyl-tRNA biosynthesis [PATH:ko00970]; RARS.argS; arginyl-tRNA synthetase [EC:6.1.1.19]                                                     | 0.727250117  | 0.004349097 |
| Genetic information and processing Transcription; Aminoacyl-tRNA biosynthesis [PATH:ko00970]; WARS.trpS; tryptophanyl-tRNA synthetase [EC:6.1.1.2]                                                 | -1.687480796 | 0.00540414  |
| Genetic information and processing Transcription; Aminoacyl-tRNA biosynthesis [PATH:ko00970]; YARS.tyrS; tyrosyl-tRNA synthetase [EC:6.1.1.1]                                                      | -3.021644096 | 0.005746486 |
| Genetic Information Processing; Folding, sorting and degradation; RNA degradation [PATH:ko03018]; dnaK; molecular chaperone DnaK                                                                   | -8.078495426 | 2.34E-08    |
| Genetic Information Processing; Folding, sorting and degradation; RNA degradation [PATH:ko03018]; ENO.eno; enolase [EC:4.2.1.11]                                                                   | -5.951624563 | 6.12E-05    |
| Genetic Information Processing; Folding, sorting and degradation; RNA degradation [PATH:ko03018]; groEL.HSPD1; chaperonin GroEL                                                                    | -9.178187903 | 1.46E-09    |
| Genetic Information Processing; Folding, sorting and degradation; RNA degradation [PATH:ko03018]; ppk; polyphosphate kinase [EC:2.7.4.1]                                                           | -5.057087872 | 2.54E-05    |
| Genetic Information Processing; Folding, sorting and degradation; RNA degradation [PATH:ko03018]; recQ; ATP-dependent DNA helicase RecQ [EC:3.6.4.12]                                              | -6.427476407 | 1.42E-08    |
| Genetic Information Processing; Folding, sorting and degradation; RNA degradation [PATH:ko03018]; rhlB; ATP-dependent RNA helicase RhlB [EC:3.6.4.13]                                              | -12.23457804 | 0.00346328  |
| Genetic Information Processing; Folding, sorting and degradation; RNA degradation [PATH:ko03018]; rho; Transcription; termination factor Rho                                                       | -11.8085478  | 0.015753168 |
| Genetic Information Processing; Folding, sorting and degradation; RNA degradation [PATH:ko03018]; rnj; ribonuclease J [EC:3.1.-.-]                                                                 | 0.836349493  | 0.011983039 |
| Genetic Information Processing; Folding, sorting and degradation; Sulfur relay system [PATH:ko04122]; tusE.dsrC; tRNA2-thiouridine synthesizing protein E [EC:2.8.1.-]                             | -12.24908257 | 0.007708466 |
| Genetic Information Processing; Replication and Repair; Base excision repair [PATH:ko03410]; UNG.UDG; uracil-DNA glycosylase [EC:3.2.2.27]                                                         | -2.156528146 | 0.002100338 |
| Genetic Information Processing; Replication and Repair; DNA replication [PATH:ko03030]; DPO3D1.holA; DNA polymerase III subunit delta [EC:2.7.7.7]                                                 | -2.057134442 | 0.001769558 |

|                                                                                                                                                            |              |             |
|------------------------------------------------------------------------------------------------------------------------------------------------------------|--------------|-------------|
| GeneticInformationProcessing;ReplicationandRepair;DNAreplication[PATH:ko03030];DPO3E.dnaQ;DNApolymeraseIIIsubunitepsilon[EC:2.7.7.7]                       | -2.281934658 | 0.014968485 |
| GeneticInformationProcessing;ReplicationandRepair;DNAreplication[PATH:ko03030];E3.1.26.4A.RNASEH1.mhA;ribonucleaseHI[EC:3.1.26.4]                          | -6.887346204 | 2.76E-07    |
| GeneticInformationProcessing;ReplicationandRepair;Homologousrecombination[PATH:ko03440];DPO3D1.holA;DNApolymeraseIIIsubunitdelta[EC:2.7.7.7]               | -2.057134442 | 0.001769558 |
| GeneticInformationProcessing;ReplicationandRepair;Homologousrecombination[PATH:ko03440];DPO3E.dnaQ;DNApolymeraseIIIsubunitepsilon[EC:2.7.7.7]              | -2.281934658 | 0.014968485 |
| GeneticInformationProcessing;ReplicationandRepair;Homologousrecombination[PATH:ko03440];recA;recombinationproteinRecA                                      | 0.836567563  | 0.0271357   |
| GeneticInformationProcessing;ReplicationandRepair;Homologousrecombination[PATH:ko03440];recB;exodeoxyribonucleaseVbetasubunit[EC:3.1.11.5]                 | -11.77951562 | 0.004389403 |
| GeneticInformationProcessing;ReplicationandRepair;Homologousrecombination[PATH:ko03440];recC;exodeoxyribonucleaseVgammasubunit[EC:3.1.11.5]                | -13.29246399 | 0.000592897 |
| GeneticInformationProcessing;ReplicationandRepair;Homologousrecombination[PATH:ko03440];recF;DNAReplicationandRepair;proteinRecF                           | -1.245840594 | 0.034583942 |
| GeneticInformationProcessing;ReplicationandRepair;Homologousrecombination[PATH:ko03440];recO;DNArepairproteinRecO(recombinationproteinO)                   | -3.194746372 | 0.000124049 |
| GeneticInformationProcessing;ReplicationandRepair;Homologousrecombination[PATH:ko03440];recR;recombinationproteinRecR                                      | -2.826461128 | 0.000868497 |
| GeneticInformationProcessing;ReplicationandRepair;Homologousrecombination[PATH:ko03440];ruvB;hollidayjunctionDNAhelicaseRuvB[EC:3.6.4.12]                  | 1.152675189  | 0.004963488 |
| GeneticInformationProcessing;ReplicationandRepair;Mismatchrepair[PATH:ko03430];dam;DNAadeninemethylase[EC:2.1.1.72]                                        | -5.547933664 | 0.001180211 |
| GeneticInformationProcessing;ReplicationandRepair;Mismatchrepair[PATH:ko03430];DPO3D1.holA;DNApolymeraseIIsubunitdelta[EC:2.7.7.7]                         | -2.057134442 | 0.001769558 |
| GeneticInformationProcessing;ReplicationandRepair;Mismatchrepair[PATH:ko03430];DPO3E.dnaQ;DNApolymeraseIIIsubunitepsilon[EC:2.7.7.7]                       | -2.281934658 | 0.014968485 |
| GeneticInformationProcessing;ReplicationandRepair;Mismatchrepair[PATH:ko03430];uvrD.pcrA;DNAhelicaseII/ATP-dependentDNAhelicasePcrA[EC:3.6.4.12]           | -2.393805795 | 0.023107112 |
| GeneticInformationProcessing;ReplicationandRepair;Nucleotideexcisionrepair[PATH:ko03420];uvrD.pcrA;DNAhelicaseII/ATP-dependentDNAhelicasePcrA[EC:3.6.4.12] | -2.393805795 | 0.023107112 |
| GeneticInformationProcessing;Transcription;Ribosome[PATH:ko03010];RP-L20.MRPL20.rplT;largesubunitribosomalproteinL20                                       | -2.496163215 | 0.007765704 |
| GeneticInformationProcessing;Transcription;Ribosome[PATH:ko03010];RP-L24.MRPL24.rplX;largesubunitribosomalproteinL24                                       | 1.468966868  | 0.005713358 |
| GeneticInformationProcessing;Transcription;Ribosome[PATH:ko03010];RP-L27.MRPL27.rpmA;largesubunitribosomalproteinL27                                       | 1.156896883  | 0.040207839 |
| GeneticInformationProcessing;Transcription;Ribosome[PATH:ko03010];RP-L28.MRPL28.rpmB;largesubunitribosomalproteinL28                                       | -2.253513018 | 0.012913123 |
| GeneticInformationProcessing;Transcription;Ribosome[PATH:ko03010];RP-L34.MRPL34.rpmH;largesubunitribosomalproteinL34                                       | -4.33611587  | 0.00057019  |
| GeneticInformationProcessing;Transcription;Ribosome[PATH:ko03010];RP-L35.MRPL35.rpmI;largesubunitribosomalproteinL35                                       | -1.924366964 | 0.043979192 |
| GeneticInformationProcessing;Transcription;Ribosome[PATH:ko03010];RP-L36.MRPL36.rpmJ;largesubunitribosomalproteinL36                                       | -2.800870899 | 0.00874987  |
| GeneticInformationProcessing;Transcription;Ribosome[PATH:ko03010];RP-S10.MRPS10.rpsJ;smallsubunitribosomalproteinS10                                       | -2.954335511 | 6.24E-05    |
| GeneticInformationProcessing;Transcription;Ribosome[PATH:ko03010];RP-S13.rpsM;smallsubunitribosomalproteinS13                                              | -1.519798236 | 0.033036164 |
| GeneticInformationProcessing;Transcription;Ribosome[PATH:ko03010];RP-S18.MRPS18.rpsR;smallsubunitribosomalproteinS18                                       | -2.63168196  | 0.003201241 |
| GeneticInformationProcessing;Transcription;Ribosome[PATH:ko03010];RP-S20.rpsT;smallsubunitribosomalproteinS20                                              | 1.226072852  | 0.020069631 |

|                                                                                                                                                                                                |              |             |
|------------------------------------------------------------------------------------------------------------------------------------------------------------------------------------------------|--------------|-------------|
| GeneticInformationProcessing;Transcription;Ribosome[PATH:ko03010];RP-S3.rpsC;smallsubunitribosomalproteinS3                                                                                    | 1.272642324  | 0.007708466 |
| GeneticInformationProcessing;Transcription;Ribosome[PATH:ko03010];RP-S4.rpsD;smallsubunitribosomalproteinS4                                                                                    | -1.822719232 | 0.016700344 |
| GeneticInformationProcessing;Transcription;Ribosome[PATH:ko03010];RP-S6.MRPS6.rpsF;smallsubunitribosomalproteinS6                                                                              | -2.771933346 | 0.00346328  |
| GeneticInformationProcessing;Transcription;RNAPolymerase[PATH:ko03020];rpoZ;DNA-directedRNAPolymerasesubunitomega[EC:2.7.7.6]                                                                  | 1.140001556  | 0.003577006 |
| Metabolism;Aminoacidmetabolism;Alanine.aspartateandglutamatemetabolism[PATH:ko00250];ald;alaninedehydrogenase[EC:1.4.1.1]                                                                      | -5.521648089 | 0.009264107 |
| Metabolism;Aminoacidmetabolism;Alanine.aspartateandglutamatemetabolism[PATH:ko00250];argG.ASS1;argininosuccinatesynthase[EC:6.3.4.5]                                                           | -2.488905339 | 0.001164129 |
| Metabolism;Aminoacidmetabolism;Alanine.aspartateandglutamatemetabolism[PATH:ko00250];argH.ASL;argininosuccinatelase[EC:4.3.2.1]                                                                | -3.714692095 | 1.59E-05    |
| Metabolism;Aminoacidmetabolism;Alanine.aspartateandglutamatemetabolism[PATH:ko00250];aspA;aspartateammonia-lyase[EC:4.3.1.1]                                                                   | -6.313900145 | 2.95E-06    |
| Metabolism;Aminoacidmetabolism;Alanine.aspartateandglutamatemetabolism[PATH:ko00250];carA.CPA1;carbamoyl-phosphatesynthasesmallsubunit[EC:6.3.5.5]                                             | -6.395428566 | 6.52E-05    |
| Metabolism;Aminoacidmetabolism;Alanine.aspartateandglutamatemetabolism[PATH:ko00250];E5.1.1.13;aspartateracemase[EC:5.1.1.13]                                                                  | -4.942524921 | 0.012913123 |
| Metabolism;Aminoacidmetabolism;Alanine.aspartateandglutamatemetabolism[PATH:ko00250];gabD;succinate-semialdehydedehydrogenase/glutarate-semialdehydedehydrogenase[EC:1.2.1.161.2.1.791.2.1.20] | -4.549986885 | 1.37E-05    |
| Metabolism;Aminoacidmetabolism;Alanine.aspartateandglutamatemetabolism[PATH:ko00250];gltB;glutamatesynthase(NADPH/NADH)largechain[EC:1.4.1.131.4.1.14]                                         | -7.841446025 | 0.000132326 |
| Metabolism;Aminoacidmetabolism;Alanine.aspartateandglutamatemetabolism[PATH:ko00250];gltD;glutamatesynthase(NADPH/NADH)smallchain[EC:1.4.1.131.4.1.14]                                         | -12.19765424 | 0.00100271  |
| Metabolism;Aminoacidmetabolism;Alanine.aspartateandglutamatemetabolism[PATH:ko00250];purB.ADSL;adenylosuccinatelase[EC:4.3.2.2]                                                                | 1.408979944  | 0.000660017 |
| Metabolism;Aminoacidmetabolism;Alanine.aspartateandglutamatemetabolism[PATH:ko00250];putA;prolinedehydrogenase/delta1-pyrroline-5-carboxylatedehydrogenase[EC:1.5.5.21.2.1.88]                 | -13.47998144 | 0.000831604 |
| Metabolism;Aminoacidmetabolism;Alanine.aspartateandglutamatemetabolism[PATH:ko00250];puuE;4-aminobutyrateaminotransferase[EC:2.6.1.19]                                                         | -5.839008597 | 1.17E-05    |
| Metabolism;Aminoacidmetabolism;Alanine.aspartateandglutamatemetabolism[PATH:ko00250];pyrB.PYR2;aspartatecarbamoyltransferasecatalyticsubunit[EC:2.1.3.2]                                       | 0.766457577  | 0.047424644 |
| Metabolism;Aminoacidmetabolism;Arginineandprolinemetabolism[PATH:ko00330];arcC;carbamatekinase[EC:2.7.2.2]                                                                                     | -11.15287326 | 0.003472935 |
| Metabolism;Aminoacidmetabolism;Arginineandprolinemetabolism[PATH:ko00330];argC;N-acetyl-gamma-glutamyl-phosphatereductase[EC:1.2.1.38]                                                         | -3.656685122 | 0.004196998 |
| Metabolism;Aminoacidmetabolism;Arginineandprolinemetabolism[PATH:ko00330];argD;acetylornithine/N-succinyldiaminopimelateaminotransferase[EC:2.6.1.112.6.1.17]                                  | -11.79756423 | 0.009303631 |
| Metabolism;Aminoacidmetabolism;Arginineandprolinemetabolism[PATH:ko00330];argG.ASS1;argininosuccinatesynthase[EC:6.3.4.5]                                                                      | -2.488905339 | 0.001164129 |
| Metabolism;Aminoacidmetabolism;Arginineandprolinemetabolism[PATH:ko00330];argH.ASL;argininosuccinatelase[EC:4.3.2.1]                                                                           | -3.714692095 | 1.59E-05    |
| Metabolism;Aminoacidmetabolism;Arginineandprolinemetabolism[PATH:ko00330];astC;succinylornithineaminotransferase[EC:2.6.1.81]                                                                  | -12.25415839 | 0.010072111 |
| Metabolism;Aminoacidmetabolism;Arginineandprolinemetabolism[PATH:ko00330];codA;cytosinedeaminase[EC:3.5.4.1]                                                                                   | -3.331975975 | 0.02302363  |
| Metabolism;Aminoacidmetabolism;Arginineandprolinemetabolism[PATH:ko00330];E1.5.1.2.proC;pyrroline-5-carboxylatereductase[EC:1.5.1.2]                                                           | -1.183816916 | 0.024547842 |
| Metabolism;Aminoacidmetabolism;Arginineandprolinemetabolism[PATH:ko00330];E2.3.1.57.speG;diamineN-acetyltransferase[EC:2.3.1.57]                                                               | -6.028212858 | 2.42E-07    |
| Metabolism;Aminoacidmetabolism;Arginineandprolinemetabolism[PATH:ko00330];E3.5.1.4.amiE;amidase[EC:3.5.1.4]                                                                                    | -9.159795129 | 0.012495682 |
| Metabolism;Aminoacidmetabolism;Arginineandprolinemetabolism[PATH:ko00330];E3.5.3.6.arcA;argininedeiminase[EC:3.5.3.6]                                                                          | -7.950039654 | 0.000119513 |

|                                                                                                                                                                     |              |             |
|---------------------------------------------------------------------------------------------------------------------------------------------------------------------|--------------|-------------|
| Metabolism;Aminoacidmetabolism;Arginineandprolinemetabolism[PATH:ko00330];E4.1.1.17.ODC1.speC.speF;ornithinedecarboxylase[EC:4.1.1.17]                              | -9.436250667 | 0.002995451 |
| Metabolism;Aminoacidmetabolism;Arginineandprolinemetabolism[PATH:ko00330];OTC.argF.argI;ornithinecarbamoyltransferase[EC:2.1.3.3]                                   | -2.288340744 | 0.002121995 |
| Metabolism;Aminoacidmetabolism;Arginineandprolinemetabolism[PATH:ko00330];prp;aminobutyraldehydedehydrogenase[EC:1.2.1.19]                                          | -11.81146043 | 0.018385998 |
| Metabolism;Aminoacidmetabolism;Arginineandprolinemetabolism[PATH:ko00330];putA;prolinedehydrogenase/delta1-pyrroline-5-carboxylatedehydrogenase[EC:1.5.5.21.2.1.88] | -13.47998144 | 0.000831604 |
| Metabolism;Aminoacidmetabolism;Cysteineandmethioninemetabolism[PATH:ko00270];E1.1.1.3;homoserinedehydrogenase[EC:1.1.1.3]                                           | -1.457338016 | 0.02429635  |
| Metabolism;Aminoacidmetabolism;Cysteineandmethioninemetabolism[PATH:ko00270];LDH.lhd;L-lactatedehydrogenase[EC:1.1.1.27]                                            | 1.073131866  | 0.038702186 |
| Metabolism;Aminoacidmetabolism;Cysteineandmethioninemetabolism[PATH:ko00270];lysC;aspartatekinase[EC:2.7.2.4]                                                       | -2.470426967 | 0.000868497 |
| Metabolism;Aminoacidmetabolism;Cysteineandmethioninemetabolism[PATH:ko00270];metC;cystathioninebeta-lyase[EC:4.4.1.8]                                               | -5.996518004 | 0.000275868 |
| Metabolism;Aminoacidmetabolism;Cysteineandmethioninemetabolism[PATH:ko00270];mmuM;homocysteineS-methyltransferase[EC:2.1.1.10]                                      | -2.741641883 | 0.000767427 |
| Metabolism;Aminoacidmetabolism;Cysteineandmethioninemetabolism[PATH:ko00270];thrA;bifunctionalasparginase/homoserinedehydrogenase1[EC:2.7.2.41.1.1.3]               | -13.32943573 | 0.014525754 |
| Metabolism;Aminoacidmetabolism;Glycine.serineandthreoninemetabolism[PATH:ko00260];DLD.lpd.pdhD;dihydrolipoamidatedehydrogenase[EC:1.8.1.4]                          | -6.375720181 | 2.61E-05    |
| Metabolism;Aminoacidmetabolism;Glycine.serineandthreoninemetabolism[PATH:ko00260];E1.1.1.3;homoserinedehydrogenase[EC:1.1.1.3]                                      | -1.457338016 | 0.02429635  |
| Metabolism;Aminoacidmetabolism;Glycine.serineandthreoninemetabolism[PATH:ko00260];gcvH.GCSH;glycinecleavagesystemHprotein                                           | -7.572877698 | 0.003467562 |
| Metabolism;Aminoacidmetabolism;Glycine.serineandthreoninemetabolism[PATH:ko00260];gcvT.AMT;aminomethyltransferase[EC:2.1.2.10]                                      | -12.21984444 | 0.002190529 |
| Metabolism;Aminoacidmetabolism;Glycine.serineandthreoninemetabolism[PATH:ko00260];GLDC.gcvP;glycinedehydrogenase[EC:1.4.4.2]                                        | -8.292996831 | 0.024593612 |
| Metabolism;Aminoacidmetabolism;Glycine.serineandthreoninemetabolism[PATH:ko00260];glyA.SHMT;glycinehydroxymethyltransferase[EC:2.1.2.1]                             | 1.57364268   | 6.61E-07    |
| Metabolism;Aminoacidmetabolism;Glycine.serineandthreoninemetabolism[PATH:ko00260];lysC;aspartatekinase[EC:2.7.2.4]                                                  | -2.470426967 | 0.000868497 |
| Metabolism;Aminoacidmetabolism;Glycine.serineandthreoninemetabolism[PATH:ko00260];serA.PHGDH;D-3-phosphoglyceratedehydrogenase[EC:1.1.1.95]                         | -3.36727392  | 5.99E-05    |
| Metabolism;Aminoacidmetabolism;Glycine.serineandthreoninemetabolism[PATH:ko00260];serC.PSAT1;phosphoserineaminotransferase[EC:2.6.1.52]                             | -2.871256379 | 0.000521046 |
| Metabolism;Aminoacidmetabolism;Glycine.serineandthreoninemetabolism[PATH:ko00260];tdh;threonine3-dehydrogenase[EC:1.1.1.103]                                        | -10.01944238 | 0.005129919 |
| Metabolism;Aminoacidmetabolism;Glycine.serineandthreoninemetabolism[PATH:ko00260];thrA;bifunctionalasparginase/homoserinedehydrogenase1[EC:2.7.2.41.1.1.3]          | -13.32943573 | 0.014525754 |
| Metabolism;Aminoacidmetabolism;Glycine.serineandthreoninemetabolism[PATH:ko00260];thrB1;homoserinekinase[EC:2.7.1.39]                                               | -1.925287818 | 0.00346328  |
| Metabolism;Aminoacidmetabolism;Histidinemetabolism[PATH:ko00340];E3.1.3.15B;histidinol-phosphatase(PHPfamily)[EC:3.1.3.15]                                          | -7.431575909 | 1.14E-08    |
| Metabolism;Aminoacidmetabolism;Histidinemetabolism[PATH:ko00340];hisA;phosphoribosylformimino-5-aminoimidazolecarboxamideribotideisomerase[EC:5.3.1.16]             | -1.487524168 | 0.046606821 |
| Metabolism;Aminoacidmetabolism;Histidinemetabolism[PATH:ko00340];hisB;imidazoleglycerol-phosphatedehydratase[EC:4.2.1.19]                                           | -2.975566053 | 0.000500234 |
| Metabolism;Aminoacidmetabolism;Histidinemetabolism[PATH:ko00340];hisC;histidinol-phosphateaminotransferase[EC:2.6.1.9]                                              | -4.325886491 | 1.99E-06    |
| Metabolism;Aminoacidmetabolism;Histidinemetabolism[PATH:ko00340];hisD;histidinoldehydrogenase[EC:1.1.1.23]                                                          | -2.518577829 | 0.001771241 |
| Metabolism;Aminoacidmetabolism;Histidinemetabolism[PATH:ko00340];hisE;phosphoribosyl-ATPpyrophosphohydrolase[EC:3.6.1.31]                                           | -2.744707468 | 0.001947491 |
| Metabolism;Aminoacidmetabolism;Histidinemetabolism[PATH:ko00340];hisF;cyclase[EC:4.1.3.-]                                                                           | -2.060923175 | 0.010567335 |

|                                                                                                                                                                                    |              |             |
|------------------------------------------------------------------------------------------------------------------------------------------------------------------------------------|--------------|-------------|
| Metabolism;Aminoacidmetabolism;Histidinemetabolism[PATH:ko00340];hisH;glutamineamidotransferase[EC:2.4.2.-]                                                                        | -2.214467993 | 0.004442549 |
| Metabolism;Aminoacidmetabolism;Histidinemetabolism[PATH:ko00340];hisI;phosphoribosyl-AMPcyclohydrolase[EC:3.5.4.19]                                                                | -2.184568523 | 0.008514636 |
| Metabolism;Aminoacidmetabolism;Lysinebiosynthesis[PATH:ko00300];argD;acetylornithine/N-succinyl-diaminopimelateaminotransferase[EC:2.6.1.112.6.1.17]                               | -11.79756423 | 0.009303631 |
| Metabolism;Aminoacidmetabolism;Lysinebiosynthesis[PATH:ko00300];dapA;4-hydroxy-tetrahydrodipicolinatesynthase[EC:4.3.3.7]                                                          | -1.322063751 | 0.038521461 |
| Metabolism;Aminoacidmetabolism;Lysinebiosynthesis[PATH:ko00300];dapB;4-hydroxy-tetrahydrodipicolinatereductase[EC:1.17.1.8]                                                        | 1.3854821    | 2.54E-05    |
| Metabolism;Aminoacidmetabolism;Lysinebiosynthesis[PATH:ko00300];dapC;N-succinyl-diaminopimelateaminotransferase[EC:2.6.1.17]                                                       | -11.141225   | 0.001653568 |
| Metabolism;Aminoacidmetabolism;Lysinebiosynthesis[PATH:ko00300];E1.1.1.3;homoserinedehydrogenase[EC:1.1.1.3]                                                                       | -1.457338016 | 0.02429635  |
| Metabolism;Aminoacidmetabolism;Lysinebiosynthesis[PATH:ko00300];lysC;aspartatekinase[EC:2.7.2.4]                                                                                   | -2.470426967 | 0.000868497 |
| Metabolism;Aminoacidmetabolism;Lysinebiosynthesis[PATH:ko00300];murE;UDP-N-acetylmuramoyl-L-alanyl-D-glutamate--2.6-diaminopimelateligase[EC:6.3.2.13]                             | -1.319193837 | 0.035849171 |
| Metabolism;Aminoacidmetabolism;Lysinebiosynthesis[PATH:ko00300];patA;aminotransferase[EC:2.6.1.-]                                                                                  | -3.048929303 | 3.84E-05    |
| Metabolism;Aminoacidmetabolism;Lysinebiosynthesis[PATH:ko00300];thrA;bifunctional aspartokinase/homoserinedehydrogenase1[EC:2.7.2.41.1.1.3]                                        | -13.32943573 | 0.014525754 |
| Metabolism;Aminoacidmetabolism;Lysinedegradation[PATH:ko00310];E2.3.1.9.atbB;acetyl-CoA:acetyltransferase[EC:2.3.1.9]                                                              | -3.373422428 | 0.00346328  |
| Metabolism;Aminoacidmetabolism;Lysinedegradation[PATH:ko00310];E4.1.1.18.ldcC.cadA;lysinedecarboxylase[EC:4.1.1.18]                                                                | -11.79107023 | 0.007257142 |
| Metabolism;Aminoacidmetabolism;Lysinedegradation[PATH:ko00310];fadJ;3-hydroxyacyl-CoA dehydrogenase/enoyl-CoA hydratase/3-hydroxybutyryl-CoA epimerase[EC:1.1.1.354.2.1.175.1.2.3] | -12.25582329 | 0.010739859 |
| Metabolism;Aminoacidmetabolism;Lysinedegradation[PATH:ko00310];gabD;succinate-semialdehydedehydrogenase/glutarate-semialdehydedehydrogenase[EC:1.2.1.161.2.1.791.2.1.20]           | -4.549986885 | 1.37E-05    |
| Metabolism;Aminoacidmetabolism;Phenylalanine.tyrosineandtryptophanbiosynthesis[PATH:ko00400];aroA;3-phosphoshikimate 1-carboxyvinyltransferase[EC:2.5.1.19]                        | 1.24780215   | 0.005802781 |
| Metabolism;Aminoacidmetabolism;Phenylalanine.tyrosineandtryptophanbiosynthesis[PATH:ko00400];ARO2.aroA;3-deoxy-7-phosphoheptulonatesynthase[EC:2.5.1.54]                           | -5.965682707 | 3.03E-05    |
| Metabolism;Aminoacidmetabolism;Phenylalanine.tyrosineandtryptophanbiosynthesis[PATH:ko00400];aroB;3-dehydroquinatesynthase[EC:4.2.3.4]                                             | 0.925983145  | 0.048249327 |
| Metabolism;Aminoacidmetabolism;Phenylalanine.tyrosineandtryptophanbiosynthesis[PATH:ko00400];E2.7.1.71.aroK.aroL;shikimatekinase[EC:2.7.1.71]                                      | 1.050467488  | 0.021690776 |
| Metabolism;Aminoacidmetabolism;Phenylalanine.tyrosineandtryptophanbiosynthesis[PATH:ko00400];hisC;histidinol-phosphateaminotransferase[EC:2.6.1.9]                                 | -4.325886491 | 1.99E-06    |
| Metabolism;Aminoacidmetabolism;Phenylalanine.tyrosineandtryptophanbiosynthesis[PATH:ko00400];trpC;indole-3-glycerolphosphatesynthase[EC:4.1.1.48]                                  | -4.542391636 | 0.000331713 |
| Metabolism;Aminoacidmetabolism;Phenylalanine.tyrosineandtryptophanbiosynthesis[PATH:ko00400];trpF;phosphoribosylanthranilateisomerase[EC:5.3.1.24]                                 | 0.705447491  | 0.034342378 |
| Metabolism;Aminoacidmetabolism;Phenylalaninemetabolism[PATH:ko00360];E3.5.1.4.amiE;amidase[EC:3.5.1.4]                                                                             | -9.159795129 | 0.012495682 |
| Metabolism;Aminoacidmetabolism;Phenylalaninemetabolism[PATH:ko00360];hcaD;3-phenylpropionate/trans-cinnamatedioxygenaseferredoxinreductasesubunit[EC:1.18.1.3]                     | -11.80808924 | 0.015307575 |
| Metabolism;Aminoacidmetabolism;Phenylalaninemetabolism[PATH:ko00360];hisC;histidinol-phosphateaminotransferase[EC:2.6.1.9]                                                         | -4.325886491 | 1.99E-06    |
| Metabolism;Aminoacidmetabolism;Phenylalaninemetabolism[PATH:ko00360];katG;catalase-peroxidase[EC:1.11.1.21]                                                                        | -11.79536398 | 0.007765704 |
| Metabolism;Aminoacidmetabolism;Phenylalaninemetabolism[PATH:ko00360];paaJ;acetyl-CoA:acetyltransferase[EC:2.3.1.-]                                                                 | -11.80808924 | 0.015307575 |

|                                                                                                                                                                                                      |              |             |
|------------------------------------------------------------------------------------------------------------------------------------------------------------------------------------------------------|--------------|-------------|
| Metabolism;Aminoacidmetabolism;Tryptophanmetabolism[PATH:ko00380];E2.3.1.9.atob;acetyl-CoAC-acetyltransferase[EC:2.3.1.9]                                                                            | -3.373422428 | 0.00346328  |
| Metabolism;Aminoacidmetabolism;Tryptophanmetabolism[PATH:ko00380];E3.5.1.4.amiE;amidase[EC:3.5.1.4]                                                                                                  | -9.159795129 | 0.012495682 |
| Metabolism;Aminoacidmetabolism;Tryptophanmetabolism[PATH:ko00380];fadJ;3-hydroxyacyl-CoAdehydrogenase/enoyl-CoAhydratase/3-hydroxybutyryl-CoAepimerase[EC:1.1.1.354.2.1.175.1.2.3]                   | -12.25582329 | 0.010739859 |
| Metabolism;Aminoacidmetabolism;Tryptophanmetabolism[PATH:ko00380];katG;catalase-peroxidase[EC:1.11.1.21]                                                                                             | -11.79536398 | 0.007765704 |
| Metabolism;Aminoacidmetabolism;Tyrosinemetabolism[PATH:ko00350];adhE;acetaldehydedehydrogenase/alcoholdehydrogenase[EC:1.2.1.10.1.1.1.1]                                                             | -2.237328876 | 0.038521461 |
| Metabolism;Aminoacidmetabolism;Tyrosinemetabolism[PATH:ko00350];adhP;alcoholdehydrogenase.propanol-preferring[EC:1.1.1.1]                                                                            | -3.523029673 | 2.61E-05    |
| Metabolism;Aminoacidmetabolism;Tyrosinemetabolism[PATH:ko00350];gabD;succinate-semialdehydedehydrogenase/glutarate-semialdehydedehydrogenase[EC:1.2.1.161.2.1.791.2.1.20]                            | -4.549986885 | 1.37E-05    |
| Metabolism;Aminoacidmetabolism;Tyrosinemetabolism[PATH:ko00350];hisC;histidinol-phosphateaminotransferase[EC:2.6.1.9]                                                                                | -4.325886491 | 1.99E-06    |
| Metabolism;Aminoacidmetabolism;Valine.leucineandisoleucinebiosynthesis[PATH:ko00290];E2.6.1.42.ilvE;branched-chainaminoacidaminotransferase[EC:2.6.1.42]                                             | -2.752257097 | 0.000346456 |
| Metabolism;Aminoacidmetabolism;Valine.leucineandisoleucinebiosynthesis[PATH:ko00290];leuB;3-isopropylmalatedehydrogenase[EC:1.1.1.85]                                                                | -1.446471659 | 0.024792564 |
| Metabolism;Aminoacidmetabolism;Valine.leucineandisoleucinebiosynthesis[PATH:ko00290];leuD;3-isopropylmalate/(R)-2-methylmalatedehydratasesmallsubunit[EC:4.2.1.334.2.1.35]                           | -2.749564252 | 0.000118783 |
| Metabolism;Aminoacidmetabolism;Valine.leucineandisoleucinedegradation[PATH:ko00280];DLD.lpd.pdhD;dihydroliipoamidatedehydrogenase[EC:1.8.1.4]                                                        | -6.375717808 | 2.61E-05    |
| Metabolism;Aminoacidmetabolism;Valine.leucineandisoleucinedegradation[PATH:ko00280];E2.3.1.9.atob;acetyl-CoAC-acetyltransferase[EC:2.3.1.9]                                                          | -3.373422428 | 0.00346328  |
| Metabolism;Aminoacidmetabolism;Valine.leucineandisoleucinedegradation[PATH:ko00280];E2.6.1.42.ilvE;branched-chainaminoacidaminotransferase[EC:2.6.1.42]                                              | -8.117069891 | 1.09E-07    |
| Metabolism;Aminoacidmetabolism;Valine.leucineandisoleucinedegradation[PATH:ko00280];E6.4.1.4B;3-methylcrotonyl-CoACarboxylasebetasubunit[EC:6.4.1.4]                                                 | -11.79536398 | 0.007765704 |
| Metabolism;Aminoacidmetabolism;Valine.leucineandisoleucinedegradation[PATH:ko00280];fadJ;3-hydroxyacyl-CoAdehydrogenase/enoyl-CoAhydratase/3-hydroxybutyryl-CoAepimerase[EC:1.1.1.354.2.1.175.1.2.3] | -12.25582329 | 0.010739859 |
| Metabolism;Biosynthesisofothersecondarymetabolites;Carbapenembiosynthesis[PATH:ko00332];proA;glutamate-5-semialdehydedehydrogenase[EC:1.2.1.41]                                                      | -6.929452986 | 8.78E-05    |
| Metabolism;Biosynthesisofothersecondarymetabolites;Flavoneandflavonolbiosynthesis[PATH:ko00944];uidA.GUSB;beta-glucuronidase[EC:3.2.1.31]                                                            | -11.78042809 | 0.003902356 |
| Metabolism;Biosynthesisofothersecondarymetabolites;Novobiocinbiosynthesis[PATH:ko00401];hisC;histidinol-phosphateaminotransferase[EC:2.6.1.9]                                                        | -4.325886491 | 1.99E-06    |
| Metabolism;Biosynthesisofothersecondarymetabolites;Phenylpropanoidbiosynthesis[PATH:ko00940];bgIX;beta-glucosidase[EC:3.2.1.21]                                                                      | -11.77203009 | 0.003118189 |
| Metabolism;Biosynthesisofothersecondarymetabolites;Phenylpropanoidbiosynthesis[PATH:ko00940];katG;catalase-peroxidase[EC:1.11.1.21]                                                                  | -11.79536398 | 0.007765704 |
| Metabolism;Biosynthesisofothersecondarymetabolites;Streptomycinbiosynthesis[PATH:ko00521];E4.2.1.46.rfbB.rfbG;dTDP-glucose4.6-dehydratase[EC:4.2.1.46]                                               | 1.072919012  | 0.035526824 |
| Metabolism;Biosynthesisofothersecondarymetabolites;Tropane.piperidineandpyridinealkaloidbiosynthesis[PATH:ko00960];E4.1.1.18.ldcC.cadA;lysinedecarboxylase[EC:4.1.1.18]                              | -11.79107023 | 0.007257142 |
| Metabolism;Biosynthesisofothersecondarymetabolites;Tropane.piperidineandpyridinealkaloidbiosynthesis[PATH:ko00960];hisC;histidinol-phosphateaminotransferase[EC:2.6.1.9]                             | -4.325886491 | 1.99E-06    |



|                                                                                                                                                                                                                                                    |              |             |
|----------------------------------------------------------------------------------------------------------------------------------------------------------------------------------------------------------------------------------------------------|--------------|-------------|
| Metabolism;Carbohydratemetabolism;Aminosugarandnucleotidesugarm etabolism[PATH:ko00520];arnA.pmrI;UDP-4-amino-4-deoxy-L-arabinoseformyltransferase/UDP-glucuronicaciddehydrogenase(UDP-4-keto-hexauronicaciddecarboxylating)[EC:2.1.2.131.1.1.305] | -9.206051617 | 0.024593612 |
| Metabolism;Carbohydratemetabolism;Aminosugarandnucleotidesugarm etabolism[PATH:ko00520];arnC.pmrF;undecaprenyl-phosphate4-deoxy-4-formamido-L-arabinosetransferase[EC:2.4.2.53]                                                                    | -12.59923004 | 0.00766499  |
| Metabolism;Carbohydratemetabolism;Aminosugarandnucleotidesugarm etabolism[PATH:ko00520];glmU;bifunctionalUDP-N-acetylglucosaminepyrophosphorylase/Glucosamine-1-phosphateN-acetyltransferase[EC:2.7.7.232.3.1.157]                                 | -1.289772237 | 0.042564457 |
| Metabolism;Carbohydratemetabolism;Aminosugarandnucleotidesugarm etabolism[PATH:ko00520];PTS-Man-EIID.manZ;PTSsystem.mannose-specificIIDcomponent                                                                                                   | 1.689056976  | 0.029533322 |
| Metabolism;Carbohydratemetabolism;Aminosugarandnucleotidesugarm etabolism[PATH:ko00520];UGDH.ugd;UDPglucose6-dehydrogenase[EC:1.1.1.22]                                                                                                            | -10.06115434 | 0.000112561 |
| Metabolism;Carbohydratemetabolism;Aminosugarandnucleotidesugarm etabolism[PATH:ko00520];UGP2.galU.galF;UTP--glucose-1-phosphateuridylyltransferase[EC:2.7.7.9]                                                                                     | 0.713947129  | 0.032725985 |
| Metabolism;Carbohydratemetabolism;Aminosugarandnucleotidesugarm etabolism[PATH:ko00520];wbpO;UDP-N-acetyl-D-galactosaminidehydrogenase[EC:1.1.1.-]                                                                                                 | -12.24908257 | 0.007708466 |
| Metabolism;Carbohydratemetabolism;Aminosugarandnucleotidesugarm etabolism[PATH:ko00520];wecB;UDP-N-acetylglucosamine2-epimerase(non-hydrolysing)[EC:5.1.3.14]                                                                                      | -5.899726023 | 0.006457012 |
| Metabolism;Carbohydratemetabolism;Aminosugarandnucleotidesugarm etabolism[PATH:ko00520];xynB;xylan1.4-beta-xylosidase[EC:3.2.1.37]                                                                                                                 | -6.215045099 | 1.45E-06    |
| Metabolism;Carbohydratemetabolism;Citratecycle(TCAcycle)[PATH:ko00020];aceE;pyruvatedehydrogenaseE1component[EC:1.2.4.1]                                                                                                                           | -11.79245895 | 0.00766499  |
| Metabolism;Carbohydratemetabolism;Citratecycle(TCAcycle)[PATH:ko00020];DLd.lpd.pdhD;dihydroliipoamididehydrogenase[EC:1.8.1.4]                                                                                                                     | -6.375720181 | 2.61E-05    |
| Metabolism;Carbohydratemetabolism;Citratecycle(TCAcycle)[PATH:ko00020];E4.2.1.2B.fumC;fumaratehydratase.classII[EC:4.2.1.2]                                                                                                                        | -3.270061347 | 0.027939722 |
| Metabolism;Carbohydratemetabolism;Citratecycle(TCAcycle)[PATH:ko00020];frdA;fumaratereductaseflavoproteinsubunit[EC:1.3.5.4]                                                                                                                       | -3.39479139  | 0.012913123 |
| Metabolism;Carbohydratemetabolism;Citratecycle(TCAcycle)[PATH:ko00020];IDH1.IDH2.icd;isocitratedehydrogenase[EC:1.1.1.42]                                                                                                                          | -2.763414464 | 0.038521461 |
| Metabolism;Carbohydratemetabolism;Citratecycle(TCAcycle)[PATH:ko00020];sdhB;succinatedehydrogenaseiron-sulfursubunit[EC:1.3.5.1]                                                                                                                   | -9.543035019 | 0.016387029 |
| Metabolism;Carbohydratemetabolism;Fructoseandmannosemetabolism[PATH:ko00051];FBA.fbaA;fructose-bisphosphatealdolase.classII[EC:4.1.2.13]                                                                                                           | -6.482770493 | 1.53E-05    |
| Metabolism;Carbohydratemetabolism;Fructoseandmannosemetabolism[PATH:ko00051];FBP.fbp;fructose-1.6-bisphosphataseI[EC:3.1.3.11]                                                                                                                     | -11.79608401 | 0.008749896 |
| Metabolism;Carbohydratemetabolism;Fructoseandmannosemetabolism[PATH:ko00051];fruK;1-phosphofructokinase[EC:2.7.1.56]                                                                                                                               | 1.272668773  | 0.001504431 |
| Metabolism;Carbohydratemetabolism;Fructoseandmannosemetabolism[PATH:ko00051];fucA;L-fuculose-phosphatealdolase[EC:4.1.2.17]                                                                                                                        | -12.24908257 | 0.007708466 |
| Metabolism;Carbohydratemetabolism;Fructoseandmannosemetabolism[PATH:ko00051];fucI;L-fucoseisomerase[EC:5.3.1.25]                                                                                                                                   | -11.79719596 | 0.007765704 |
| Metabolism;Carbohydratemetabolism;Fructoseandmannosemetabolism[PATH:ko00051];PTS-Fru-EIIA.fruB;PTSsystem.fructose-specificIIAcomponent[EC:2.7.1.69]                                                                                                | -5.590205876 | 0.000401184 |
| Metabolism;Carbohydratemetabolism;Fructoseandmannosemetabolism[PATH:ko00051];PTS-Fru-EIIB.fruA;PTSsystem.fructose-specificIIBcomponent[EC:2.7.1.69]                                                                                                | -5.59151029  | 0.000401184 |
| Metabolism;Carbohydratemetabolism;Fructoseandmannosemetabolism[PATH:ko00051];PTS-Fru-EIIC.fruA;PTSsystem.fructose-specificIICcomponent                                                                                                             | -5.591510284 | 0.000401184 |
| Metabolism;Carbohydratemetabolism;Fructoseandmannosemetabolism[PATH:ko00051];PTS-Man-EIID.manZ;PTSsystem.mannose-specificIIDcomponent                                                                                                              | 1.689056976  | 0.029533322 |
| Metabolism;Carbohydratemetabolism;Fructoseandmannosemetabolism[PATH:ko00051];PTS-Mtl-EIIB.mtlA;PTSsystem.mannitol-specificIIBcomponent[EC:2.7.1.69]                                                                                                | -11.12095281 | 0.001653568 |

|                                                                                                                                                         |              |             |
|---------------------------------------------------------------------------------------------------------------------------------------------------------|--------------|-------------|
| Metabolism;Carbohydratemetabolism;Fructoseandmannosemetabolism[PATH:ko00051];PTS-Mtl-EIIC.mtlA;PTSsystem.mannitol-specificIICcomponent                  | -11.12095281 | 0.001653568 |
| Metabolism;Carbohydratemetabolism;Fructoseandmannosemetabolism[PATH:ko00051];rhaD;rhamnulose-1-phosphatealdolase[EC:4.1.2.19]                           | -9.817164929 | 0.011904792 |
| Metabolism;Carbohydratemetabolism;Fructoseandmannosemetabolism[PATH:ko00051];rhmA;2-dehydro-3-deoxy-L-rhamnonatealdolase[EC:4.1.2.53]                   | -11.80991106 | 0.016700344 |
| Metabolism;Carbohydratemetabolism;Fructoseandmannosemetabolism[PATH:ko00051];xylA;xylloseisomerase[EC:5.3.1.5]                                          | -6.406312281 | 9.13E-08    |
| Metabolism;Carbohydratemetabolism;Galactosemetabolism[PATH:ko00052];bgaB.lacA;beta-galactosidase[EC:3.2.1.23]                                           | -10.58581923 | 2.42E-07    |
| Metabolism;Carbohydratemetabolism;Galactosemetabolism[PATH:ko00052];E3.2.1.10;oligo-1.6-glucosidase[EC:3.2.1.10]                                        | -5.480195436 | 2.42E-07    |
| Metabolism;Carbohydratemetabolism;Galactosemetabolism[PATH:ko00052];E3.2.1.22B.galA.rafA;alpha-galactosidase[EC:3.2.1.22]                               | -5.507313066 | 2.05E-05    |
| Metabolism;Carbohydratemetabolism;Galactosemetabolism[PATH:ko00052];ebgA;evolvedbeta-galactosidasesubunitalpha[EC:3.2.1.23]                             | -7.749288161 | 0.015307292 |
| Metabolism;Carbohydratemetabolism;Galactosemetabolism[PATH:ko00052];glf;UDP-galactopyranosemutase[EC:5.4.99.9]                                          | -1.683382157 | 0.00882928  |
| Metabolism;Carbohydratemetabolism;Galactosemetabolism[PATH:ko00052];lacC;tagatose6-phosphatekinase[EC:2.7.1.144]                                        | -3.600257432 | 0.041405281 |
| Metabolism;Carbohydratemetabolism;Galactosemetabolism[PATH:ko00052];lacZ;beta-galactosidase[EC:3.2.1.23]                                                | -5.671584301 | 3.48E-05    |
| Metabolism;Carbohydratemetabolism;Galactosemetabolism[PATH:ko00052];malZ;alpha-glucosidase[EC:3.2.1.20]                                                 | -9.006626157 | 2.85E-07    |
| Metabolism;Carbohydratemetabolism;Galactosemetabolism[PATH:ko00052];melA;alpha-galactosidase[EC:3.2.1.22]                                               | -12.25454019 | 0.010249226 |
| Metabolism;Carbohydratemetabolism;Galactosemetabolism[PATH:ko00052];PTS-Aga-EIIA.agaF;PTSsystem.N-acetylgalactosamine-specificIIAcomponent[EC:2.7.1.69] | -6.128638867 | 1.43E-06    |
| Metabolism;Carbohydratemetabolism;Galactosemetabolism[PATH:ko00052];PTS-Gat-EIIA.gatA;PTSsystem.galactitol-specificIIAcomponent[EC:2.7.1.69]            | -3.296106652 | 0.048719099 |
| Metabolism;Carbohydratemetabolism;Galactosemetabolism[PATH:ko00052];PTS-Gat-EIIC.gatC;PTSsystem.galactitol-specificIICcomponent                         | -3.771901762 | 0.005986024 |
| Metabolism;Carbohydratemetabolism;Galactosemetabolism[PATH:ko00052];PTS-Ula-EIIA.ulaC.sgaA;PTSsystem.ascorbate-specificIIAcomponent[EC:2.7.1.69]        | -9.175545735 | 2.62E-07    |
| Metabolism;Carbohydratemetabolism;Galactosemetabolism[PATH:ko00052];PTS-Ula-EIIB.ulaB.sgaB;PTSsystem.ascorbate-specificIIBcomponent[EC:2.7.1.69]        | -4.517957613 | 0.000103131 |
| Metabolism;Carbohydratemetabolism;Galactosemetabolism[PATH:ko00052];PTS-Ula-EIIC.ulaA.sgaT;PTSsystem.ascorbate-specificIICcomponent                     | -5.798272313 | 1.36E-06    |
| Metabolism;Carbohydratemetabolism;Galactosemetabolism[PATH:ko00052];UGDH.ugd;UDPglucose6-dehydrogenase[EC:1.1.1.22]                                     | -10.06115434 | 0.000112561 |
| Metabolism;Carbohydratemetabolism;Galactosemetabolism[PATH:ko00052];UGP2.galU.galF;UTP--glucose-1-phosphateuridylyltransferase[EC:2.7.7.9]              | 0.713947129  | 0.032725985 |
| Metabolism;Carbohydratemetabolism;Galactosemetabolism[PATH:ko00052];ulaG;L-ascorbate6-phosphatelactonase[EC:3.1.1.-]                                    | -6.489220836 | 4.17E-07    |
| Metabolism;Carbohydratemetabolism;Glycolysis/Gluconeogenesis[PATH:ko00010];aceE;pyruvatedehydrogenaseE1component[EC:1.2.4.1]                            | -11.79245895 | 0.00766499  |
| Metabolism;Carbohydratemetabolism;Glycolysis/Gluconeogenesis[PATH:ko00010];adhE;acetaldehydedehydrogenase/alcoholdehydrogenase[EC:1.2.1.101.1.1.1]      | -2.237328876 | 0.038521461 |
| Metabolism;Carbohydratemetabolism;Glycolysis/Gluconeogenesis[PATH:ko00010];adhP;alcoholdehydrogenase.propanol-preferring[EC:1.1.1.1]                    | -3.523029673 | 2.61E-05    |
| Metabolism;Carbohydratemetabolism;Glycolysis/Gluconeogenesis[PATH:ko00010];DLD.lpd.pdhD;dihydrolipoamidedehydrogenase[EC:1.8.1.4]                       | -6.375720181 | 2.61E-05    |
| Metabolism;Carbohydratemetabolism;Glycolysis/Gluconeogenesis[PATH:ko00010];E3.2.1.86B.bglA;6-phospho-beta-glucosidase[EC:3.2.1.86]                      | -1.560020113 | 0.012785221 |
| Metabolism;Carbohydratemetabolism;Glycolysis/Gluconeogenesis[PATH:ko00010];ENO.eno;enolase[EC:4.2.1.11]                                                 | -5.951624563 | 6.12E-05    |

|                                                                                                                                                                                                          |              |             |
|----------------------------------------------------------------------------------------------------------------------------------------------------------------------------------------------------------|--------------|-------------|
| Metabolism;Carbohydratemetabolism;Glycolysis/Gluconeogenesis[PATH:ko00010];FBA.fbaA;fructose-bisphosphatealdolase.classII[EC:4.1.2.13]                                                                   | -6.482770493 | 1.53E-05    |
| Metabolism;Carbohydratemetabolism;Glycolysis/Gluconeogenesis[PATH:ko00010];FBP.fbp;fructose-1.6-bisphosphataseI[EC:3.1.3.11]                                                                             | -11.79608401 | 0.008749896 |
| Metabolism;Carbohydratemetabolism;Glycolysis/Gluconeogenesis[PATH:ko00010];GAPDH.gapA;glyceraldehyde3-phosphatedehydrogenase[EC:1.2.1.12]                                                                | -5.46010237  | 0.000134338 |
| Metabolism;Carbohydratemetabolism;Glycolysis/Gluconeogenesis[PATH:ko00010];LDH.ldh;L-lactatedehydrogenase[EC:1.1.1.27]                                                                                   | 1.073131866  | 0.038702186 |
| Metabolism;Carbohydratemetabolism;Glycolysis/Gluconeogenesis[PATH:ko00010];PTS-Arb-EIIB.glvB;PTSsystem.arbutin-likeIIBcomponent[EC:2.7.1.69]                                                             | -6.651053486 | 0.011057468 |
| Metabolism;Carbohydratemetabolism;Glycolysis/Gluconeogenesis[PATH:ko00010];PTS-Arb-EIIC.glvC;PTSsystem.arbutin-likeIICcomponent                                                                          | -6.651053486 | 0.011057468 |
| Metabolism;Carbohydratemetabolism;Glyoxylateanddicarboxylatemetabolism[PATH:ko00630];accB.bccP;acetyl-CoAcarboxylasebiotincarboxylcarrierprotein                                                         | 0.846959361  | 0.049618655 |
| Metabolism;Carbohydratemetabolism;Glyoxylateanddicarboxylatemetabolism[PATH:ko00630];adhE;acetaldehydedehydrogenase/alcoholdehydrogenase[EC:1.2.1.101.1.1.1]                                             | -2.237328876 | 0.038521461 |
| Metabolism;Carbohydratemetabolism;Glyoxylateanddicarboxylatemetabolism[PATH:ko00630];aldA;lactaldehydedehydrogenase/glycolaldehydedehydrogenase[EC:1.2.1.221.2.1.21]                                     | -9.591392669 | 0.000124308 |
| Metabolism;Carbohydratemetabolism;Glyoxylateanddicarboxylatemetabolism[PATH:ko00630];butA.budC;meso-butanedioldehydrogenase/(S,S)-butanedioldehydrogenase/diacetylreductase[EC:1.1.1.-1.1.1.761.1.1.304] | -3.717248269 | 2.80E-05    |
| Metabolism;Carbohydratemetabolism;Glyoxylateanddicarboxylatemetabolism[PATH:ko00630];E2.3.1.54.pflD;formateC-acetyltransferase[EC:2.3.1.54]                                                              | -5.45284466  | 0.002584061 |
| Metabolism;Carbohydratemetabolism;Glyoxylateanddicarboxylatemetabolism[PATH:ko00630];E2.3.1.9.atoB;acetyl-CoA-acetyltransferase[EC:2.3.1.9]                                                              | -3.373422428 | 0.00346328  |
| Metabolism;Carbohydratemetabolism;Glyoxylateanddicarboxylatemetabolism[PATH:ko00630];E4.1.1.5.aldS;acetolactatedecarboxylase[EC:4.1.1.5]                                                                 | 0.973137017  | 0.001422087 |
| Metabolism;Carbohydratemetabolism;Glyoxylateanddicarboxylatemetabolism[PATH:ko00630];E5.3.1.22.gip;hydroxypyruvateisomerase[EC:5.3.1.22]                                                                 | -8.01390043  | 0.024792564 |
| Metabolism;Carbohydratemetabolism;Glyoxylateanddicarboxylatemetabolism[PATH:ko00630];fadJ;3-hydroxyacyl-CoAdehydrogenase/enoyl-CoAhydratase/3-hydroxybutyryl-CoAepimerase[EC:1.1.1.354.2.1.175.1.2.3]    | -12.25582329 | 0.010739859 |
| Metabolism;Carbohydratemetabolism;Glyoxylateanddicarboxylatemetabolism[PATH:ko00630];fdoG.fdfH;formatedehydrogenasemajorsubunit[EC:1.2.1.2]                                                              | -6.762554455 | 0.004407149 |
| Metabolism;Carbohydratemetabolism;Glyoxylateanddicarboxylatemetabolism[PATH:ko00630];frdA;fumaratereductaseflavoproteinsubunit[EC:1.3.5.4]                                                               | -3.39479139  | 0.012913123 |
| Metabolism;Carbohydratemetabolism;Glyoxylateanddicarboxylatemetabolism[PATH:ko00630];gabD;succinate-semialdehydedehydrogenase/glutarate-semialdehydedehydrogenase[EC:1.2.1.161.2.1.791.2.1.20]           | -4.549986885 | 1.37E-05    |
| Metabolism;Carbohydratemetabolism;Glyoxylateanddicarboxylatemetabolism[PATH:ko00630];gcvH.GCSH;glycinecleavagesystemHprotein                                                                             | -7.572877698 | 0.003467562 |
| Metabolism;Carbohydratemetabolism;Glyoxylateanddicarboxylatemetabolism[PATH:ko00630];glcD;glycolateoxidase[EC:1.1.3.15]                                                                                  | -8.769486459 | 0.039283267 |
| Metabolism;Carbohydratemetabolism;Glyoxylateanddicarboxylatemetabolism[PATH:ko00630];gldA;glyceroldehydrogenase[EC:1.1.1.6]                                                                              | -5.911646545 | 2.42E-07    |
| Metabolism;Carbohydratemetabolism;Glyoxylateanddicarboxylatemetabolism[PATH:ko00630];glyA.SHMT;glycinehydroxymethyltransferase[EC:2.1.2.1]                                                               | 1.57364268   | 6.61E-07    |
| Metabolism;Carbohydratemetabolism;Glyoxylateanddicarboxylatemetabolism[PATH:ko00630];LDH.ldh;L-lactatedehydrogenase[EC:1.1.1.27]                                                                         | 1.073131866  | 0.038702186 |

|                                                                                                                                                                            |              |             |
|----------------------------------------------------------------------------------------------------------------------------------------------------------------------------|--------------|-------------|
| Metabolism;Carbohydratemetabolism;Glyoxylateanddicarboxylatemetabolism[PATH:ko00630];leuB;3-isopropylmalatedehydrogenase[EC:1.1.1.85]                                      | -1.446471659 | 0.024792564 |
| Metabolism;Carbohydratemetabolism;Glyoxylateanddicarboxylatemetabolism[PATH:ko00630];leuD;3-isopropylmalate/(R)-2-methylmalatedehydratasesmallsubunit[EC:4.2.1.334.2.1.35] | -2.749564252 | 0.000118783 |
| Metabolism;Carbohydratemetabolism;Glyoxylateanddicarboxylatemetabolism[PATH:ko00630];puuE;4-aminobutyrateaminotransferase[EC:2.6.1.19]                                     | -5.839008597 | 1.17E-05    |
| Metabolism;Carbohydratemetabolism;Glyoxylateanddicarboxylatemetabolism[PATH:ko00630];sdhB;succinatedehydrogenaseiron-sulfursubunit[EC:1.3.5.1]                             | -9.543035019 | 0.016387029 |
| Metabolism;Carbohydratemetabolism;Pentoseandglucuronateinterconversions[PATH:ko00040];araA;L-arabinoseisomerase[EC:5.3.1.4]                                                | -5.847898782 | 4.20E-06    |
| Metabolism;Carbohydratemetabolism;Pentoseandglucuronateinterconversions[PATH:ko00040];araD;L-ribulose-5-phosphate4-epimerase[EC:5.1.3.4]                                   | -5.477300859 | 1.23E-07    |
| Metabolism;Carbohydratemetabolism;Pentoseandglucuronateinterconversions[PATH:ko00040];kduD;2-deoxy-D-gluconate3-dehydrogenase[EC:1.1.1.125]                                | -5.405432446 | 1.51E-05    |
| Metabolism;Carbohydratemetabolism;Pentoseandglucuronateinterconversions[PATH:ko00040];rhaD;rhamnulose-1-phosphatealdolase[EC:4.1.2.19]                                     | -9.817164929 | 0.011904792 |
| Metabolism;Carbohydratemetabolism;Pentoseandglucuronateinterconversions[PATH:ko00040];sgbH;3-dehydro-L-gulonate-6-phosphatedecarboxylase[EC:4.1.1.85]                      | -5.457570519 | 4.37E-05    |
| Metabolism;Carbohydratemetabolism;Pentoseandglucuronateinterconversions[PATH:ko00040];sgbU;hexulose-6-phosphateisomerase[EC:5.-.-.-]                                       | -4.509274122 | 4.02E-05    |
| Metabolism;Carbohydratemetabolism;Pentoseandglucuronateinterconversions[PATH:ko00040];UGDH.ugd;UDPglucose6-dehydrogenase[EC:1.1.1.22]                                      | -10.06115434 | 0.000112561 |
| Metabolism;Carbohydratemetabolism;Pentoseandglucuronateinterconversions[PATH:ko00040];UGP2.galU.galF;UTP--glucose-1-phosphateuridylyltransferase[EC:2.7.7.9]               | 0.713947129  | 0.032725985 |
| Metabolism;Carbohydratemetabolism;Pentoseandglucuronateinterconversions[PATH:ko00040];uidA.GUSB;beta-glucuronidase[EC:3.2.1.31]                                            | -11.78042809 | 0.003902356 |
| Metabolism;Carbohydratemetabolism;Pentoseandglucuronateinterconversions[PATH:ko00040];xylA;xyloseisomerase[EC:5.3.1.5]                                                     | -6.406312281 | 9.13E-08    |
| Metabolism;Carbohydratemetabolism;Pentoseandglucuronateinterconversions[PATH:ko00040];xylB.XYLB;xylulokinase[EC:2.7.1.17]                                                  | -7.128084003 | 1.81E-09    |
| Metabolism;Carbohydratemetabolism;Pentosephosphatepathway[PATH:ko00030];E2.2.1.2.talA.talB;transaldolase[EC:2.2.1.2]                                                       | -11.76644974 | 0.002995451 |
| Metabolism;Carbohydratemetabolism;Pentosephosphatepathway[PATH:ko00030];E2.7.1.12.gntK.idnK;gluconokinase[EC:2.7.1.12]                                                     | -5.702007645 | 4.30E-05    |
| Metabolism;Carbohydratemetabolism;Pentosephosphatepathway[PATH:ko00030];E4.1.2.9.phosphoketolase[EC:4.1.2.9]                                                               | -4.035204468 | 0.000344147 |
| Metabolism;Carbohydratemetabolism;Pentosephosphatepathway[PATH:ko00030];FBA.fbaA;fructose-bisphosphatealdolase.classII[EC:4.1.2.13]                                        | -6.482770493 | 1.53E-05    |
| Metabolism;Carbohydratemetabolism;Pentosephosphatepathway[PATH:ko00030];FBP.fbp;fructose-1.6-bisphosphataseI[EC:3.1.3.11]                                                  | -11.79608401 | 0.008749896 |
| Metabolism;Carbohydratemetabolism;Pentosephosphatepathway[PATH:ko00030];G6PD.zwf;glucose-6-phosphate1-dehydrogenase[EC:1.1.1.49]                                           | -4.965135325 | 4.77E-07    |
| Metabolism;Carbohydratemetabolism;Pentosephosphatepathway[PATH:ko00030];kdgK;2-dehydro-3-deoxygluconokinase[EC:2.7.1.45]                                                   | -6.233354308 | 7.70E-08    |
| Metabolism;Carbohydratemetabolism;Pentosephosphatepathway[PATH:ko00030];PGD.gnd;6-phosphogluconatedehydrogenase[EC:1.1.1.44]                                               | -4.864027831 | 2.76E-07    |
| Metabolism;Carbohydratemetabolism;Pentosephosphatepathway[PATH:ko00030];pgl;6-phosphogluconolactonase[EC:3.1.1.31]                                                         | -6.034832737 | 6.61E-07    |
| Metabolism;Carbohydratemetabolism;Pentosephosphatepathway[PATH:ko00030];rbsK.RBKS;ribokinase[EC:2.7.1.15]                                                                  | -5.105090944 | 7.53E-07    |
| Metabolism;Carbohydratemetabolism;Pyruvatemetabolism[PATH:ko00620];accB.bccP;acetyl-CoAcarboxylasebiotincarboxylcarrierprotein                                             | 0.846959361  | 0.049618655 |
| Metabolism;Carbohydratemetabolism;Pyruvatemetabolism[PATH:ko00620];aceE;pyruvatedehydrogenaseE1component[EC:1.2.4.1]                                                       | -11.79245895 | 0.00766499  |
| Metabolism;Carbohydratemetabolism;Pyruvatemetabolism[PATH:ko00620];acyP;acylphosphatase[EC:3.6.1.7]                                                                        | -2.916448414 | 0.002995451 |

|                                                                                                                                                    |              |             |
|----------------------------------------------------------------------------------------------------------------------------------------------------|--------------|-------------|
| Metabolism;Carbohydratemetabolism;Pyruvatemetabolism[PATH:ko00620];adhE;acetaldehydedehydrogenase/alcoholdehydrogenase[EC:1.2.1.101.1.1.1]         | -2.237328876 | 0.038521461 |
| Metabolism;Carbohydratemetabolism;Pyruvatemetabolism[PATH:ko00620];aldA;lactaldehydedehydrogenase/glycolaldehydedehydrogenase[EC:1.2.1.221.2.1.21] | -9.591392669 | 0.000124308 |
| Metabolism;Carbohydratemetabolism;Pyruvatemetabolism[PATH:ko00620];DLD.lpd.pdhD;dihydrolipoamidedehydrogenase[EC:1.8.1.4]                          | -6.375720181 | 2.61E-05    |
| Metabolism;Carbohydratemetabolism;Pyruvatemetabolism[PATH:ko00620];dld;D-lactatedehydrogenase[EC:1.1.1.28]                                         | -5.496561247 | 3.05E-05    |
| Metabolism;Carbohydratemetabolism;Pyruvatemetabolism[PATH:ko00620];E1.2.3.3.poxL;pyruvateoxidase[EC:1.2.3.3]                                       | -3.748915635 | 5.00E-05    |
| Metabolism;Carbohydratemetabolism;Pyruvatemetabolism[PATH:ko00620];E2.3.1.54.pflD;formateC-acetyltransferase[EC:2.3.1.54]                          | -5.45284466  | 0.002584061 |
| Metabolism;Carbohydratemetabolism;Pyruvatemetabolism[PATH:ko00620];E2.3.1.9.atoB;acetyl-CoAC-acetyltransferase[EC:2.3.1.9]                         | -3.373422428 | 0.00346328  |
| Metabolism;Carbohydratemetabolism;Pyruvatemetabolism[PATH:ko00620];E4.2.1.2B.fumC;fumaratehydratase.classII[EC:4.2.1.2]                            | -3.270061347 | 0.027939722 |
| Metabolism;Carbohydratemetabolism;Pyruvatemetabolism[PATH:ko00620];frdA;fumaratereductaseflavoproteinsubunit[EC:1.3.5.4]                           | -3.39479139  | 0.012913123 |
| Metabolism;Carbohydratemetabolism;Pyruvatemetabolism[PATH:ko00620];LDH.ldh;L-lactatedehydrogenase[EC:1.1.1.27]                                     | 1.073131866  | 0.038702186 |
| Metabolism;Carbohydratemetabolism;Pyruvatemetabolism[PATH:ko00620];ldhA;D-lactatedehydrogenase[EC:1.1.1.28]                                        | -4.97732117  | 3.71E-07    |
| Metabolism;Carbohydratemetabolism;Pyruvatemetabolism[PATH:ko00620];ppdK;pyruvate.orthophosphatedikinase[EC:2.7.9.1]                                | -9.358232779 | 0.000641867 |
| Metabolism;Carbohydratemetabolism;Pyruvatemetabolism[PATH:ko00620];pps.ppsA;pyruvate.waterdikinase[EC:2.7.9.2]                                     | -3.962193451 | 0.029219419 |
| Metabolism;Carbohydratemetabolism;Starchandsucrosemetabolism[PATH:ko00500];bcsA;cellulosesynthase(UDP-forming)[EC:2.4.1.12]                        | -4.859827727 | 0.003902356 |
| Metabolism;Carbohydratemetabolism;Starchandsucrosemetabolism[PATH:ko00500];bgIX;beta-galucosidase[EC:3.2.1.21]                                     | -11.77203009 | 0.003118189 |
| Metabolism;Carbohydratemetabolism;Starchandsucrosemetabolism[PATH:ko00500];E2.4.1.1.glgP.PYG;starchphosphorylase[EC:2.4.1.1]                       | -6.048917334 | 0.001103521 |
| Metabolism;Carbohydratemetabolism;Starchandsucrosemetabolism[PATH:ko00500];E2.4.1.7;sucrosephosphorylase[EC:2.4.1.7]                               | -6.528183172 | 1.48E-07    |
| Metabolism;Carbohydratemetabolism;Starchandsucrosemetabolism[PATH:ko00500];E2.4.1.8.mapA;maltosephosphorylase[EC:2.4.1.8]                          | -5.503252856 | 6.90E-07    |
| Metabolism;Carbohydratemetabolism;Starchandsucrosemetabolism[PATH:ko00500];E3.2.1.10;oligo-1.6-galucosidase[EC:3.2.1.10]                           | -5.480195436 | 2.42E-07    |
| Metabolism;Carbohydratemetabolism;Starchandsucrosemetabolism[PATH:ko00500];E3.2.1.122.glvA;maltose-6'-phosphategalucosidase[EC:3.2.1.122]          | -7.062080919 | 0.002705541 |
| Metabolism;Carbohydratemetabolism;Starchandsucrosemetabolism[PATH:ko00500];E3.2.1.28.treA.treF;alpha.alpha-trehalase[EC:3.2.1.28]                  | -13.30306937 | 0.001164129 |
| Metabolism;Carbohydratemetabolism;Starchandsucrosemetabolism[PATH:ko00500];malQ;4-alpha-galucanotransferase[EC:2.4.1.25]                           | -6.694938881 | 0.003049744 |
| Metabolism;Carbohydratemetabolism;Starchandsucrosemetabolism[PATH:ko00500];malZ;alpha-galucosidase[EC:3.2.1.20]                                    | -9.006626157 | 2.85E-07    |
| Metabolism;Carbohydratemetabolism;Starchandsucrosemetabolism[PATH:ko00500];otsA;trehalose6-phosphatesynthase[EC:2.4.1.15]                          | -12.2522972  | 0.009026929 |
| Metabolism;Carbohydratemetabolism;Starchandsucrosemetabolism[PATH:ko00500];pgmB;beta-phosphogalucumutase[EC:5.4.2.6]                               | -7.691695791 | 0.003902356 |
| Metabolism;Carbohydratemetabolism;Starchandsucrosemetabolism[PATH:ko00500];treC;trehalose-6-phosphatehydrolase[EC:3.2.1.93]                        | -3.017443165 | 0.038521461 |
| Metabolism;Carbohydratemetabolism;Starchandsucrosemetabolism[PATH:ko00500];treX.glgX;galucogenoperonprotein[EC:3.2.1.-]                            | -12.24041236 | 0.003851629 |
| Metabolism;Carbohydratemetabolism;Starchandsucrosemetabolism[PATH:ko00500];UGDH.ugd;UDPgalucose6-dehydrogenase[EC:1.1.1.22]                        | -10.06115434 | 0.000112561 |
| Metabolism;Carbohydratemetabolism;Starchandsucrosemetabolism[PATH:ko00500];UGP2.galU.galF;UTP--galucose-1-phosphateuridylyltransferase[EC:2.7.7.9] | 0.713947129  | 0.032725985 |
| Metabolism;Carbohydratemetabolism;Starchandsucrosemetabolism[PATH:ko00500];uidA.GUSB;beta-galucuronidase[EC:3.2.1.31]                              | -11.78042809 | 0.003902356 |
| Metabolism;Carbohydratemetabolism;Starchandsucrosemetabolism[PATH:ko00500];xynB;xylan1.4-beta-xylosidase[EC:3.2.1.37]                              | -6.215045099 | 1.45E-06    |

|                                                                                                                                                                              |              |             |
|------------------------------------------------------------------------------------------------------------------------------------------------------------------------------|--------------|-------------|
| Metabolism;Energy metabolism;Nitrogen metabolism[PATH:ko00910];arcC;carbamatekinase[EC:2.7.2.2]                                                                              | -11.15287326 | 0.003472935 |
| Metabolism;Energy metabolism;Nitrogen metabolism[PATH:ko00910];cynT.can;carbonicanhydrase[EC:4.2.1.1]                                                                        | 2.451903192  | 0.016049109 |
| Metabolism;Energy metabolism;Nitrogen metabolism[PATH:ko00910];glutB;glutamatesynthase(NADPH/NADH)largechain[EC:1.4.1.131.4.1.14]                                            | -7.841446025 | 0.000132326 |
| Metabolism;Energy metabolism;Nitrogen metabolism[PATH:ko00910];glutD;glutamatesynthase(NADPH/NADH)smallchain[EC:1.4.1.131.4.1.14]                                            | -12.19765424 | 0.00100271  |
| Metabolism;Energy metabolism;Nitrogen metabolism[PATH:ko00910];ncd2.npd;nitronatemonooxygenase[EC:1.13.12.16]                                                                | -10.33978025 | 0.042908627 |
| Metabolism;Energy metabolism;Nitrogen metabolism[PATH:ko00910];nirB;nitritereductase(NADH)largesubunit[EC:1.7.1.15]                                                          | -11.78042809 | 0.003902356 |
| Metabolism;Energy metabolism;Nitrogen metabolism[PATH:ko00910];NRT.narK.nrtP.nasA;MFS transporter.NNPfamily.nitrate/nitritetransporter                                       | -12.87188337 | 0.003472935 |
| Metabolism;Energy metabolism;Oxidative phosphorylation[PATH:ko00190];ATPF0A.atpB;F-typeH+-transportingATPasesubunita                                                         | -1.529677463 | 0.023044057 |
| Metabolism;Energy metabolism;Oxidative phosphorylation[PATH:ko00190];ATPF0B.atpF;F-typeH+-transportingATPasesubunitb                                                         | 1.185859681  | 0.043106084 |
| Metabolism;Energy metabolism;Oxidative phosphorylation[PATH:ko00190];ATPF1B.atpD;F-typeH+-transportingATPasesubunitbeta[EC:3.6.3.14]                                         | -7.079413701 | 1.13E-05    |
| Metabolism;Energy metabolism;Oxidative phosphorylation[PATH:ko00190];ATPF1D.atpH;F-typeH+-transportingATPasesubunitdelta                                                     | 1.004732623  | 0.022656255 |
| Metabolism;Energy metabolism;Oxidative phosphorylation[PATH:ko00190];ATPF1G.atpG;F-typeH+-transportingATPasesubunitgamma                                                     | -5.858814818 | 0.000372819 |
| Metabolism;Energy metabolism;Oxidative phosphorylation[PATH:ko00190];coxA;cytochromeoxidasesubunitI[EC:1.9.3.1]                                                              | -11.80991106 | 0.016700344 |
| Metabolism;Energy metabolism;Oxidative phosphorylation[PATH:ko00190];cydA;cytochromedubiquinoloxidasesubunitI[EC:1.10.3.-]                                                   | -5.329192263 | 1.17E-05    |
| Metabolism;Energy metabolism;Oxidative phosphorylation[PATH:ko00190];cydB;cytochromedubiquinoloxidasesubunitII[EC:1.10.3.-]                                                  | -6.06163902  | 1.23E-07    |
| Metabolism;Energy metabolism;Oxidative phosphorylation[PATH:ko00190];cyoB;cytochromeubiquinoloxidasesubunitI[EC:1.10.3.-]                                                    | -9.486563045 | 0.006880452 |
| Metabolism;Energy metabolism;Oxidative phosphorylation[PATH:ko00190];frdA;fumaratereductaseflavoproteinsubunit[EC:1.3.5.4]                                                   | -3.39479139  | 0.012913123 |
| Metabolism;Energy metabolism;Oxidative phosphorylation[PATH:ko00190];ndh;NADHdehydrogenase[EC:1.6.99.3]                                                                      | -4.997215855 | 5.99E-05    |
| Metabolism;Energy metabolism;Oxidative phosphorylation[PATH:ko00190];nuoA;NADH-quinoneoxidoreductasesubunitA[EC:1.6.5.3]                                                     | -8.619570321 | 0.026503529 |
| Metabolism;Energy metabolism;Oxidative phosphorylation[PATH:ko00190];nuoG;NADH-quinoneoxidoreductasesubunitG[EC:1.6.5.3]                                                     | -9.154070597 | 0.011532103 |
| Metabolism;Energy metabolism;Oxidative phosphorylation[PATH:ko00190];nuoI;NADH-quinoneoxidoreductasesubunitI[EC:1.6.5.3]                                                     | -8.619570321 | 0.026503529 |
| Metabolism;Energy metabolism;Oxidative phosphorylation[PATH:ko00190];nuoM;NADH-quinoneoxidoreductasesubunitM[EC:1.6.5.3]                                                     | -11.79536398 | 0.007765704 |
| Metabolism;Energy metabolism;Oxidative phosphorylation[PATH:ko00190];ppk;polyphosphatekinase[EC:2.7.4.1]                                                                     | -5.057087872 | 2.54E-05    |
| Metabolism;Energy metabolism;Oxidative phosphorylation[PATH:ko00190];sdhB;succinatedehydrogenaseiron-sulfursubunit[EC:1.3.5.1]                                               | -9.543035019 | 0.016387029 |
| Metabolism;Glycanbiosynthesisandmetabolism;Glycosaminoglycandegradation[PATH:ko00531];uidA.GUSB;beta-glucuronidase[EC:3.2.1.31]                                              | -11.78042809 | 0.003902356 |
| Metabolism;Glycanbiosynthesisandmetabolism;Glycosphingolipidbiosynthesis-globoseries[PATH:ko00603];E3.2.1.22B.galA.rafA;alpha-galactosidase[EC:3.2.1.22]                     | -5.507313066 | 2.05E-05    |
| Metabolism;Glycanbiosynthesisandmetabolism;Glycosphingolipidbiosynthesis-globoseries[PATH:ko00603];melA;alpha-galactosidase[EC:3.2.1.22]                                     | -12.25454019 | 0.010249226 |
| Metabolism;Glycanbiosynthesisandmetabolism;Lipopolysaccharidebiosynthesis[PATH:ko00540];kdsA;2-dehydro-3-deoxyphosphooctonatealdolase(KDO8-Psynthase)[EC:2.5.1.55]           | -5.708904552 | 3.55E-07    |
| Metabolism;Glycanbiosynthesisandmetabolism;Lipopolysaccharidebiosynthesis[PATH:ko00540];lpxB;lipid-A-disaccharidesynthase[EC:2.4.1.182]                                      | -12.87221147 | 0.003552338 |
| Metabolism;Glycanbiosynthesisandmetabolism;Lipopolysaccharidebiosynthesis[PATH:ko00540];waaB.rfab;UDP-D-galactose:(glucosyl)LPSalpha-1.6-D-galactosyltransferase[EC:2.4.1.-] | -12.84017433 | 0.000658913 |

|                                                                                                                                                                                               |               |             |
|-----------------------------------------------------------------------------------------------------------------------------------------------------------------------------------------------|---------------|-------------|
| Metabolism;Glycanbiosynthesisandmetabolism;Lipopolysaccharidebiosynthesis[PATH:ko00540];waaL.rfal;O-antigenligase[EC:6.-.-.]                                                                  | -12.24990814  | 0.007909432 |
| Metabolism;Glycanbiosynthesisandmetabolism;Lipopolysaccharidebiosynthesisproteins[BR:ko01005];mrdA;penicillin-bindingprotein2                                                                 | -12.25582329  | 0.010739859 |
| Metabolism;Glycanbiosynthesisandmetabolism;Lipopolysaccharidebiosynthesisproteins[BR:ko01005];murE;UDP-N-acetylmuramoyl-L-alanyl-D-glutamate--2,6-diaminopimelateligase[EC:6.3.2.13]          | -1.319193837  | 0.035849171 |
| Metabolism;Glycanbiosynthesisandmetabolism;Lipopolysaccharidebiosynthesisproteins[BR:ko01005];pbpA;penicillin-bindingprotein1[EC:3.4.-.-.]                                                    | -13.09558937  | 0.001238169 |
| Metabolism;Glycanbiosynthesisandmetabolism;Lipopolysaccharidebiosynthesisproteins[BR:ko01005];pbpB;penicillin-bindingprotein2B                                                                | -5.410198846  | 3.05E-05    |
| Metabolism;Glycanbiosynthesisandmetabolism;Otherglycandegradation[PATH:ko00511];ebgA;evolvedbeta-galactosidasesubunitalpha[EC:3.2.1.23]                                                       | -7.749288161  | 0.015307292 |
| Metabolism;Glycanbiosynthesisandmetabolism;Otherglycandegradation[PATH:ko00511];lacZ;beta-galactosidase[EC:3.2.1.23]                                                                          | -5.671584301  | 3.48E-05    |
| Metabolism;Glycanbiosynthesisandmetabolism;Otherglycandegradation[PATH:ko00511];NEU1;sialidase-1[EC:3.2.1.18]                                                                                 | -8.737726906  | 0.025817995 |
| Metabolism;Lipidmetabolism;Arachidonicacidmetabolism[PATH:ko00590];E1.11.1.9;glutathioneperoxidase[EC:1.11.1.9]                                                                               | -5.514768616  | 3.08E-05    |
| Metabolism;Lipidmetabolism;Biosynthesisofunsaturatedfattyacids[PATH:ko01040];fadJ;3-hydroxyacyl-CoAdehydrogenase/enoyl-CoAhydratase/3-hydroxybutyryl-CoAepimerase[EC:1.1.1.354.2.1.175.1.2.3] | -12.25582329  | 0.010739859 |
| Metabolism;Lipidmetabolism;Fattyacidbiosynthesis[PATH:ko00061];ac cB.bccP;acetyl-CoAcarboxylasebiotincarboxylcarrierprotein                                                                   | 0.846959361   | 0.049618655 |
| Metabolism;Lipidmetabolism;Fattyacidbiosynthesis[PATH:ko00061];fabI;enoyl-[acyl-carrierprotein]reductaseI[EC:1.3.1.91.3.1.10]                                                                 | -4.200496577  | 0.026264115 |
| Metabolism;Lipidmetabolism;Fattyacidbiosynthesis[PATH:ko00061];fabG;3-oxoacyl-[acyl-carrierprotein]reductase[EC:1.1.1.100]                                                                    | -12.249148521 | 0.007708111 |
| Metabolism;Lipidmetabolism;Fattyacidbiosynthesis[PATH:ko00061];fabD;[acyl-carrier-protein]S-malonyltransferase[EC:2.3.1.39]                                                                   | -5.507314792  | 2.05E-05    |
| Metabolism;Lipidmetabolism;Fattyacidbiosynthesis[PATH:ko00061];fabB;3-oxoacyl-[acyl-carrier-protein]synthaseI[EC:2.3.1.41]                                                                    | -5.67158135   | 3.48E-05    |
| Metabolism;Lipidmetabolism;Fattyacidbiosynthesis[PATH:ko00061];fabH;3-oxoacyl-[acyl-carrier-protein]synthaseIII[EC:2.3.1.180]                                                                 | -12.25451469  | 0.010249151 |
| Metabolism;Lipidmetabolism;Fattyacidbiosynthesis[PATH:ko00061];fabA;3-hydroxyacyl-[acyl-carrierprotein]dehydratase/trans-2-decenoyl-                                                          | -12.24914542  | 0.007708597 |
| Metabolism;Lipidmetabolism;Fattyacidbiosynthesis[PATH:ko00061];fabK;enoyl-[acyl-carrierprotein]reductaseIII[EC:1.3.1.91]                                                                      | -23.48454267  | 0.000247784 |
| Metabolism;Lipidmetabolism;Fattyacidbiosynthesis[PATH:ko00061];M CH.medium-chainacyl-[acyl-carrier-protein]hydrolase[EC:3.1.2.21]                                                             | -8.737733964  | 0.025818789 |
| Metabolism;Lipidmetabolism;Fattyaciddegradation[PATH:ko00071];adhE;acetaldehydedehydrogenase/alcoholdehydrogenase[EC:1.2.1.101.1.1.1]                                                         | -7.78137147   | 3.62E-06    |
| Metabolism;Lipidmetabolism;Fattyaciddegradation[PATH:ko00071];adhP;alcoholdehydrogenase.propanol-preferring[EC:1.1.1.1]                                                                       | -3.523029673  | 2.61E-05    |
| Metabolism;Lipidmetabolism;Fattyaciddegradation[PATH:ko00071];E2.3.1.9.atob;acetyl-CoA-acetyltransferase[EC:2.3.1.9]                                                                          | -3.373422428  | 0.00346328  |
| Metabolism;Lipidmetabolism;Fattyaciddegradation[PATH:ko00071];fadJ;3-hydroxyacyl-CoAdehydrogenase/enoyl-CoAhydratase/3-hydroxybutyryl-CoAepimerase[EC:1.1.1.354.2.1.175.1.2.3]                | -12.25582329  | 0.010739859 |
| Metabolism;Lipidmetabolism;Fattyaciddegradation[PATH:ko00071];hcaD;3-phenylpropionate/trans-cinnamatedioxygenaseferredoxinreductasesubunit[EC:1.18.1.3]                                       | -11.80808924  | 0.015307575 |
| Metabolism;Lipidmetabolism;GlycerolLipidmetabolism;[PATH:ko00561];E3.2.1.22B.galA.rafA;alpha-galactosidase[EC:3.2.1.22]                                                                       | -5.507313066  | 2.05E-05    |
| Metabolism;Lipidmetabolism;GlycerolLipidmetabolism;[PATH:ko00561];gldA;glyceroldehydrogenase[EC:1.1.1.6]                                                                                      | -5.911646545  | 2.42E-07    |
| Metabolism;Lipidmetabolism;GlycerolLipidmetabolism;[PATH:ko00561];glpK.GK;glycerolkinase[EC:2.7.1.30]                                                                                         | -4.25237447   | 0.02262111  |

|                                                                                                                                                                                              |              |             |
|----------------------------------------------------------------------------------------------------------------------------------------------------------------------------------------------|--------------|-------------|
| Metabolism;Lipidmetabolism;GlyceroLipidmetabolism;[PATH:ko00561];melA;alpha-galactosidase[EC:3.2.1.22]                                                                                       | -12.25454019 | 0.010249226 |
| Metabolism;Lipidmetabolism;GlyceroLipidmetabolism;[PATH:ko00561];plsC;1-acyl-sn-glycerol-3-phosphateacyltransferase[EC:2.3.1.51]                                                             | -4.18632634  | 1.53E-05    |
| Metabolism;Lipidmetabolism;GlycerophosphoLipidmetabolism;[PATH:ko00564];E3.1.4.46.glpQ.ugpQ;glycerophosphoryldiesterphosphodiesterase[EC:3.1.4.46]                                           | -5.491990218 | 2.31E-07    |
| Metabolism;Lipidmetabolism;GlycerophosphoLipidmetabolism;[PATH:ko00564];glpA.glpD;glycerol-3-phosphatedehydrogenase[EC:1.1.5.3]                                                              | -11.17474535 | 0.015307575 |
| Metabolism;Lipidmetabolism;GlycerophosphoLipidmetabolism;[PATH:ko00564];plsC;1-acyl-sn-glycerol-3-phosphateacyltransferase[EC:2.3.1.51]                                                      | -4.18632634  | 1.53E-05    |
| Metabolism;Lipidmetabolism;GlycerophosphoLipidmetabolism;[PATH:ko00564];ybhO;putativecardiolipinsynthase[EC:2.7.8.-]                                                                         | -11.80991106 | 0.016700344 |
| Metabolism;Lipidmetabolism;Steroidhormonebiosynthesis[PATH:ko00140];E3.1.6.1.aslA;arylsulfatase[EC:3.1.6.1]                                                                                  | -12.24908257 | 0.007708466 |
| Metabolism;Metabolismofcofactorsandvitamins;Biotinmetabolism[PATH:ko00780];bioA;adenosylmethionine-8-amino-7-oxononanoateaminotransferase[EC:2.6.1.62]                                       | -8.238907281 | 0.019121562 |
| Metabolism;Metabolismofcofactorsandvitamins;Biotinmetabolism[PATH:ko00780];bioF;8-amino-7-oxononanoatesynthase[EC:2.3.1.47]                                                                  | -11.17670975 | 0.00346328  |
| Metabolism;Metabolismofcofactorsandvitamins;Biotinmetabolism[PATH:ko00780];birA;BirAfamilyTranscription;alregulator.biotinoperonrepressor/biotin-[acetyl-CoA-carboxylase]ligase[EC:6.3.4.15] | -1.906216563 | 0.003762574 |
| Metabolism;Metabolismofcofactorsandvitamins;Biotinmetabolism[PATH:ko00780];fabI;enoyl-[acyl-carrierprotein]reductaseI[EC:1.3.1.91.3.1.10]                                                    | -4.200496577 | 0.026264115 |
| Metabolism;Metabolismofcofactorsandvitamins;Lipoicacidmetabolism[PATH:ko00785];lplA;lipoate-proteinligaseA[EC:2.7.7.63]                                                                      | 0.662250911  | 0.042708858 |
| Metabolism;Metabolismofcofactorsandvitamins;Nicotinateandnicotinamide metabolism[PATH:ko00760];pncB.NAPRT1;nicotinatephosphoribosyltransferase[EC:6.3.4.21]                                  | -2.194474502 | 0.012065563 |
| Metabolism;Metabolismofcofactorsandvitamins;Nicotinateandnicotinamide metabolism[PATH:ko00760];pntA;NAD(P)transhydrogenasesubunitalpha[EC:1.6.1.2]                                           | -11.771402   | 0.003262402 |
| Metabolism;Metabolismofcofactorsandvitamins;Nicotinateandnicotinamide metabolism[PATH:ko00760];pntB;NAD(P)transhydrogenasesubunitbeta[EC:1.6.1.2]                                            | -7.584308884 | 0.001497268 |
| Metabolism;Metabolismofcofactorsandvitamins;Nicotinateandnicotinamide metabolism[PATH:ko00760];sthA.udhA;NAD(P)transhydrogenase[EC:1.6.1.1]                                                  | -8.72149831  | 0.020955328 |
| Metabolism;Metabolismofcofactorsandvitamins;Nicotinateandnicotinamide metabolism[PATH:ko00760];ushA;5'-nucleotidase/UDP-sugardiphosphatase[EC:3.1.3.53.6.1.45]                               | -11.14418291 | 0.003902356 |
| Metabolism;Metabolismofcofactorsandvitamins;Onecarbonpoolbyfolate[PATH:ko00670];E6.3.3.2;5-formyltetrahydrofolatecyclo-ligase[EC:6.3.3.2]                                                    | 4.351269696  | 2.73E-06    |
| Metabolism;Metabolismofcofactorsandvitamins;Onecarbonpoolbyfolate[PATH:ko00670];folD;methylenetetrahydrofolatedehydrogenase(NADP+)/methenyltetrahydrofolatecyclohydrolase[EC:1.5.1.53.5.4.9] | 1.161964243  | 1.48E-06    |
| Metabolism;Metabolismofcofactorsandvitamins;Onecarbonpoolbyfolate[PATH:ko00670];gvvT.AMT;aminomethyltransferase[EC:2.1.2.10]                                                                 | -12.21984444 | 0.002190529 |
| Metabolism;Metabolismofcofactorsandvitamins;Onecarbonpoolbyfolate[PATH:ko00670];glyA.SHMT;glycinehydroxymethyltransferase[EC:2.1.2.1]                                                        | 1.57364268   | 6.61E-07    |
| Metabolism;Metabolismofcofactorsandvitamins;Onecarbonpoolbyfolate[PATH:ko00670];metF.MTHFR;methylenetetrahydrofolatereductase(NADPH)[EC:1.5.1.20]                                            | -1.73540505  | 0.007781973 |
| Metabolism;Metabolismofcofactorsandvitamins;Onecarbonpoolbyfolate[PATH:ko00670];MTFMT.fmt;methionyl-tRNAformyltransferase[EC:2.1.2.9]                                                        | 0.89200961   | 0.002995451 |
| Metabolism;Metabolismofcofactorsandvitamins;PantothenateandCoAbiosynthesis[PATH:ko00770];acpS;holo-[acyl-carrierprotein]synthase[EC:2.7.8.7]                                                 | 1.797149853  | 3.02E-05    |
| Metabolism;Metabolismofcofactorsandvitamins;PantothenateandCoAbiosynthesis[PATH:ko00770];coaA;typeI pantothenatekinase[EC:2.7.1.33]                                                          | -3.183807136 | 0.000132326 |



|                                                                                                                                                                                                                   |              |             |
|-------------------------------------------------------------------------------------------------------------------------------------------------------------------------------------------------------------------|--------------|-------------|
| Metabolism;Metabolism of cofactors and vitamins;Pantothenate and CoA biosynthesis[PATH:ko00770];coaBC.dfp;phosphopantothenoyl cysteine decarboxylase/phosphopantothenate--cysteine ligase[EC:4.1.1.366.3.2.5]     | -4.62304432  | 0.000161726 |
| Metabolism;Metabolism of cofactors and vitamins;Pantothenate and CoA biosynthesis[PATH:ko00770];E2.6.1.42.ilvE;branched-chain amino acid aminotransferase[EC:2.6.1.42]                                            | -2.752257097 | 0.000346456 |
| Metabolism;Metabolism of cofactors and vitamins;Pantothenate and CoA biosynthesis[PATH:ko00770];LYS5.acpT;4'-phosphopantetheinyltransferase[EC:2.7.8.-]                                                           | -8.454479247 | 0.000571588 |
| Metabolism;Metabolism of cofactors and vitamins;Retinol metabolism[PATH:ko00830];adhP;alcohol dehydrogenase.propanol-preferring[EC:1.1.1.1]                                                                       | -3.523029673 | 2.61E-05    |
| Metabolism;Metabolism of cofactors and vitamins;Retinol metabolism[PATH:ko00830];cysG;uroporphyrin-III C-methyltransferase/precorrin-2 dehydrogenase/sirohydrochlorin ferrochelatase[EC:2.1.1.1071.3.1.764.9.1.4] | -12.25721895 | 0.011710324 |
| Metabolism;Metabolism of cofactors and vitamins;Retinol metabolism[PATH:ko00830];EARS.gltX;glutamyl-tRNA synthetase[EC:6.1.1.17]                                                                                  | -8.769486459 | 0.039283267 |
| Metabolism;Metabolism of cofactors and vitamins;Retinol metabolism[PATH:ko00830];uidA.GUSB;beta-glucuronidase[EC:3.2.1.31]                                                                                        | -11.78042809 | 0.003902356 |
| Metabolism;Metabolism of cofactors and vitamins;Riboflavin metabolism[PATH:ko00740];ribE.RIB5;riboflavin synthase[EC:2.5.1.9]                                                                                     | -11.16547026 | 0.010541687 |
| Metabolism;Metabolism of cofactors and vitamins;Thiamine metabolism[PATH:ko00730];dxs;1-deoxy-D-xylulose-5-phosphate synthase[EC:2.2.1.7]                                                                         | -6.229850367 | 0.019768035 |
| Metabolism;Metabolism of cofactors and vitamins;Thiamine metabolism[PATH:ko00730];tenA;thiaminase(Transcription;al activator TenA)[EC:3.5.99.2]                                                                   | -7.098204951 | 4.37E-08    |
| Metabolism;Metabolism of cofactors and vitamins;Thiamine metabolism[PATH:ko00730];thiD;hydroxymethylpyrimidine/phosphomethylpyrimidine kinase[EC:2.7.1.492.7.4.7]                                                 | -5.462044542 | 3.40E-07    |
| Metabolism;Metabolism of cofactors and vitamins;Thiamine metabolism[PATH:ko00730];thiE;thiamine-phosphate pyrophosphorylase[EC:2.5.1.3]                                                                           | -4.842846205 | 0.000680763 |
| Metabolism;Metabolism of cofactors and vitamins;Thiamine metabolism[PATH:ko00730];thiM;hydroxyethylthiazole kinase[EC:2.7.1.50]                                                                                   | -6.265058553 | 2.32E-07    |
| Metabolism;Metabolism of cofactors and vitamins;Ubiquinone and other terpenoid-quinone biosynthesis[PATH:ko00130];menA;1,4-dihydroxy-2-naphthoate octaprenyltransferase[EC:2.5.1.742.5.1.-]                       | -3.705492221 | 2.05E-05    |
| Metabolism;Metabolism of cofactors and vitamins;Ubiquinone and other terpenoid-quinone biosynthesis[PATH:ko00130];menB;naphthoate synthase[EC:4.1.3.36]                                                           | -5.662348449 | 2.85E-07    |
| Metabolism;Metabolism of cofactors and vitamins;Ubiquinone and other terpenoid-quinone biosynthesis[PATH:ko00130];menC;O-succinylbenzoate synthase[EC:4.2.1.113]                                                  | -6.150562841 | 5.96E-06    |
| Metabolism;Metabolism of cofactors and vitamins;Ubiquinone and other terpenoid-quinone biosynthesis[PATH:ko00130];menD;2-succinyl-5-enolpyruvyl-6-hydroxy-3-cyclohexene-1-carboxylate synthase[EC:2.2.1.9]        | -5.67901844  | 2.76E-07    |
| Metabolism;Metabolism of cofactors and vitamins;Ubiquinone and other terpenoid-quinone biosynthesis[PATH:ko00130];menE;O-succinylbenzoic acid--CoA ligase[EC:6.2.1.26]                                            | -5.130738797 | 2.75E-05    |
| Metabolism;Metabolism of cofactors and vitamins;Ubiquinone and other terpenoid-quinone biosynthesis[PATH:ko00130];menF;menaquinone-specific isochorismate synthase[EC:5.4.4.2]                                    | -6.584201842 | 2.31E-07    |
| Metabolism;Metabolism of cofactors and vitamins;Ubiquinone and other terpenoid-quinone biosynthesis[PATH:ko00130];menH;2-succinyl-6-hydroxy-2,4-cyclohexadiene-1-carboxylate synthase[EC:4.2.99.20]               | -8.457238479 | 2.32E-08    |
| Metabolism;Metabolism of cofactors and vitamins;Ubiquinone and other terpenoid-quinone biosynthesis[PATH:ko00130];ubiE;ubiquinone/menaquinone biosynthesis methyltransferase[EC:2.1.1.1632.1.1.201]               | -5.869040184 | 5.45E-06    |
| Metabolism;Metabolism of cofactors and vitamins;Vitamin B6 metabolism[PATH:ko00750];pdxK.pdxY;pyridoxine kinase[EC:2.7.1.35]                                                                                      | -1.729055447 | 0.00766499  |
| Metabolism;Metabolism of cofactors and vitamins;Vitamin B6 metabolism[PATH:ko00750];serC.PSAT1;phosphoserine aminotransferase[EC:2.6.1.52]                                                                        | -2.871256379 | 0.000521046 |

|                                                                                                                                                                                                                       |              |             |
|-----------------------------------------------------------------------------------------------------------------------------------------------------------------------------------------------------------------------|--------------|-------------|
| Metabolism;Metabolism of other amino acids;beta-Alaninemetabolism[PATH:ko00410];fadJ;3-hydroxyacyl-CoA dehydrogenase/enoyl-CoA hydratase/3-hydroxybutyryl-CoA epimerase[EC:1.1.1.354.2.1.175.1.2.3]                   | -12.25582329 | 0.010739859 |
| Metabolism;Metabolism of other amino acids;beta-Alaninemetabolism[PATH:ko00410];prp;aminobutyraldehyde dehydrogenase[EC:1.2.1.19]                                                                                     | -11.81146043 | 0.018385998 |
| Metabolism;Metabolism of other amino acids;beta-Alaninemetabolism[PATH:ko00410];puuE;4-aminobutyrate aminotransferase[EC:2.6.1.19]                                                                                    | -5.839008597 | 1.17E-05    |
| Metabolism;Metabolism of other amino acids;Cyanoamino acid metabolism[PATH:ko00460];bglX;beta-glucosidase[EC:3.2.1.21]                                                                                                | -11.77203009 | 0.003118189 |
| Metabolism;Metabolism of other amino acids;Cyanoamino acid metabolism[PATH:ko00460];glyA.SHMT;glycine hydroxymethyltransferase[EC:2.1.2.1]                                                                            | 1.57364268   | 6.61E-07    |
| Metabolism;Metabolism of other amino acids;Glutathione metabolism[PATH:ko00480];CARP_pepA;leucyl aminopeptidase[EC:3.4.11.1]                                                                                          | -5.161530567 | 0.000625531 |
| Metabolism;Metabolism of other amino acids;Glutathione metabolism[PATH:ko00480];E1.11.1.9;glutathione peroxidase[EC:1.11.1.9]                                                                                         | -5.514768616 | 3.08E-05    |
| Metabolism;Metabolism of other amino acids;Glutathione metabolism[PATH:ko00480];E4.1.1.17.ODC1.speC.speF;ornithine decarboxylase[EC:4.1.1.17]                                                                         | -9.436250667 | 0.002995451 |
| Metabolism;Metabolism of other amino acids;Glutathione metabolism[PATH:ko00480];G6PD.zwf;glucose-6-phosphate 1-dehydrogenase[EC:1.1.1.49]                                                                             | -4.965135325 | 4.77E-07    |
| Metabolism;Metabolism of other amino acids;Glutathione metabolism[PATH:ko00480];IDH1.IDH2.icd;isocitrate dehydrogenase[EC:1.1.1.42]                                                                                   | -2.763414464 | 0.038521461 |
| Metabolism;Metabolism of other amino acids;Glutathione metabolism[PATH:ko00480];pepB;PepB aminopeptidase[EC:3.4.11.23]                                                                                                | -5.706615237 | 0.000287658 |
| Metabolism;Metabolism of other amino acids;Glutathione metabolism[PATH:ko00480];pepD;dipeptidase D[EC:3.4.13.-]                                                                                                       | -7.596152366 | 0.000603532 |
| Metabolism;Metabolism of other amino acids;Glutathione metabolism[PATH:ko00480];pepN;aminopeptidase N[EC:3.4.11.2]                                                                                                    | -7.651072919 | 1.47E-06    |
| Metabolism;Metabolism of other amino acids;Glutathione metabolism[PATH:ko00480];PGD.gnd;6-phosphogluconate dehydrogenase[EC:1.1.1.44]                                                                                 | -4.864027831 | 2.76E-07    |
| Metabolism;Metabolism of other amino acids;Seleno compound metabolism[PATH:ko00450];metC;cystathionine beta-lyase[EC:4.4.1.8]                                                                                         | 1.143510255  | 0.007708466 |
| Metabolism;Metabolism of other amino acids;Taurine and hypotaurine metabolism[PATH:ko00430];ald;alanine dehydrogenase[EC:1.4.1.1]                                                                                     | -5.521648089 | 0.009264107 |
| Metabolism;Metabolism of terpenoids and polyketides;Biosynthesis of siderophore group nonribosomal peptides[PATH:ko01053];menF;menaquinone-specific isochorismate synthase[EC:5.4.4.2]                                | -6.584201842 | 2.31E-07    |
| Metabolism;Metabolism of terpenoids and polyketides;Biosynthesis of vancomycin group antibiotics[PATH:ko01055];E4.2.1.46.rfbB.rfgG;dTDP-glucose 4.6-dehydratase[EC:4.2.1.46]                                          | 1.072919012  | 0.035526824 |
| Metabolism;Metabolism of terpenoids and polyketides;Carotenoid biosynthesis[PATH:ko00906];crtB;phytoene synthase[EC:2.5.1.32]                                                                                         | -6.365725146 | 6.94E-05    |
| Metabolism;Metabolism of terpenoids and polyketides;Carotenoid biosynthesis[PATH:ko00906];crtN;4.4'-diapophytoenedesaturase[EC:1.3.8.2]                                                                               | -13.30782884 | 3.48E-05    |
| Metabolism;Metabolism of terpenoids and polyketides;Geraniol degradation[PATH:ko00281];fadJ;3-hydroxyacyl-CoA dehydrogenase/enoyl-CoA epimerase[EC:1.1.1.354.2.1.175.1.2.3]                                           | -12.25582329 | 0.010739859 |
| Metabolism;Metabolism of terpenoids and polyketides;Limonene and pinene degradation[PATH:ko00903];fadJ;3-hydroxyacyl-CoA dehydrogenase/enoyl-CoA hydratase/3-hydroxybutyryl-CoA epimerase[EC:1.1.1.354.2.1.175.1.2.3] | -12.25582329 | 0.010739859 |
| Metabolism;Metabolism of terpenoids and polyketides;Nonribosomal peptide structures[PATH:ko01054];E5.1.1.13;aspartate racemase[EC:5.1.1.13]                                                                           | -4.942524921 | 0.012913123 |
| Metabolism;Metabolism of terpenoids and polyketides;Polyketide sugar unit biosynthesis[PATH:ko00523];E4.2.1.46.rfbB.rfgG;dTDP-glucose 4.6-dehydratase[EC:4.2.1.46]                                                    | 1.072919012  | 0.035526824 |
| Metabolism;Metabolism of terpenoids and polyketides;Terpenoid backbone biosynthesis[PATH:ko00900];dxs;1-deoxy-D-xylulose-5-phosphate synthase[EC:2.2.1.7]                                                             | -6.229850367 | 0.019768035 |

|                                                                                                                                                                                    |              |             |
|------------------------------------------------------------------------------------------------------------------------------------------------------------------------------------|--------------|-------------|
| Metabolism;Metabolismofterpenoidsandpolyketides;Terpenoidbackbone biosynthesis[PATH:ko00900];E1.17.7.1.gcpE.ispG;(E)-4-hydroxy-3-methylbut-2-enyl-diphosphatesynthase[EC:1.17.7.1] | -11.16530237 | 0.001348297 |
| Metabolism;Metabolismofterpenoidsandpolyketides;Terpenoidbackbone biosynthesis[PATH:ko00900];E2.3.1.9.atoB;acetyl-CoA-acetyltransferase[EC:2.3.1.9]                                | -3.373422428 | 0.00346328  |
| Metabolism;Metabolismofterpenoidsandpolyketides;Terpenoidbackbone biosynthesis[PATH:ko00900];hepST;heptaprenyldiphosphatesynthase[EC:2.5.1.30]                                     | -5.468788894 | 7.53E-07    |
| Metabolism;Metabolismofterpenoidsandpolyketides;Terpenoidbackbone biosynthesis[PATH:ko00900];ispD;2-C-methyl-D-erythritol4-phosphatecytidyltransferase[EC:2.7.7.60]                | -11.77098915 | 0.00346328  |
| Metabolism;Metabolismofterpenoidsandpolyketides;Terpenoidbackbone biosynthesis[PATH:ko00900];MVD.mvaD;diphosphomevalonatedecarboxylase[EC:4.1.1.33]                                | 0.613401277  | 0.039704551 |
| Metabolism;Metabolismofterpenoidsandpolyketides;Tetracyclinebiosynthesis[PATH:ko00253];accB.bccP;acetyl-CoAcarboxylasebiotincarboxylcarrierprotein                                 | 0.846959361  | 0.049618655 |
| Metabolism;Metabolismofterpenoidsandpolyketides;Zeatinbiosynthesis[PATH:ko00908];miaA.TRIT1;tRNA dimethylallyltransferase[EC:2.5.1.75]                                             | -1.383946873 | 0.03049584  |
| Metabolism;Nucleotidemetabolism;Purinemetabolism[PATH:ko00230];ade;adeninedeaminase[EC:3.5.4.2]                                                                                    | -5.402962856 | 2.50E-05    |
| Metabolism;Nucleotidemetabolism;Purinemetabolism[PATH:ko00230];APRT.apr;adeninephosphoribosyltransferase[EC:2.4.2.7]                                                               | -1.931540789 | 0.010739859 |
| Metabolism;Nucleotidemetabolism;Purinemetabolism[PATH:ko00230];arcC;carbamatekinase[EC:2.7.2.2]                                                                                    | -11.15287326 | 0.003472935 |
| Metabolism;Nucleotidemetabolism;Purinemetabolism[PATH:ko00230];dgt;dGTPase[EC:3.1.5.1]                                                                                             | -12.184505   | 0.000642141 |
| Metabolism;Nucleotidemetabolism;Purinemetabolism[PATH:ko00230];DPO3D1.holA;DNAPolymeraseIIIsubunitdelta[EC:2.7.7.7]                                                                | -2.057134442 | 0.001769558 |
| Metabolism;Nucleotidemetabolism;Purinemetabolism[PATH:ko00230];DPO3E.dnaQ;DNAPolymeraseIIIsubunitepsilon[EC:2.7.7.7]                                                               | -2.281934658 | 0.014968485 |
| Metabolism;Nucleotidemetabolism;Purinemetabolism[PATH:ko00230];E1.17.4.1A.nrdA.nrdE;ribonucleoside-diphosphatereductasealphachain[EC:1.17.4.1]                                     | -1.864005504 | 0.016073075 |
| Metabolism;Nucleotidemetabolism;Purinemetabolism[PATH:ko00230];E1.17.4.1B.nrdB.nrdF;ribonucleoside-diphosphatereductasebetachain[EC:1.17.4.1]                                      | -1.671837133 | 0.016557857 |
| Metabolism;Nucleotidemetabolism;Purinemetabolism[PATH:ko00230];E1.7.1.7.guaC;GMPreductase[EC:1.7.1.7]                                                                              | -7.20639124  | 0.000767427 |
| Metabolism;Nucleotidemetabolism;Purinemetabolism[PATH:ko00230];nudF;ADP-ribosepyrophosphatase[EC:3.6.1.13]                                                                         | -1.93227125  | 0.009171493 |
| Metabolism;Nucleotidemetabolism;Purinemetabolism[PATH:ko00230];ppx-gppA;exopolyphosphatase/guanosine-5'-triphosphate.3'-diphosphatepyrophosphatase[EC:3.6.1.113.6.1.40]            | -5.507859918 | 7.70E-08    |
| Metabolism;Nucleotidemetabolism;Purinemetabolism[PATH:ko00230];purB.ADSL;adenylosuccinatelyase[EC:4.3.2.2]                                                                         | 1.408979944  | 0.000660017 |
| Metabolism;Nucleotidemetabolism;Purinemetabolism[PATH:ko00230];purD;phosphoribosylamine--glycine ligase[EC:6.3.4.13]                                                               | 0.959229612  | 4.69E-05    |
| Metabolism;Nucleotidemetabolism;Purinemetabolism[PATH:ko00230];purE;5-(carboxyamino)imidazole ribonucleotidemutase[EC:5.4.99.18]                                                   | 0.900720113  | 0.001873837 |
| Metabolism;Nucleotidemetabolism;Purinemetabolism[PATH:ko00230];purK;5-(carboxyamino)imidazole ribonucleotidesynthase[EC:6.3.4.18]                                                  | 0.747616177  | 0.00158021  |
| Metabolism;Nucleotidemetabolism;Purinemetabolism[PATH:ko00230];purL.PFAS;phosphoribosylformylglycinamidinesynthase[EC:6.3.5.3]                                                     | -5.800440217 | 0.000280125 |
| Metabolism;Nucleotidemetabolism;Purinemetabolism[PATH:ko00230];rpoZ;DNA-directedRNAPolymerasesubunitomega[EC:2.7.7.6]                                                              | 1.140001556  | 0.003577006 |
| Metabolism;Nucleotidemetabolism;Purinemetabolism[PATH:ko00230];ushA;5'-nucleotidase/UDP-sugardiphosphatase[EC:3.1.3.53.6.1.45]                                                     | -11.14418291 | 0.003902356 |
| Metabolism;Nucleotidemetabolism;Purinemetabolism[PATH:ko00230];ygeT.xdhB;xanthinedehydrogenaseFAD-binding subunit[EC:1.17.1.4]                                                     | -9.543035019 | 0.016387029 |
| Metabolism;Nucleotidemetabolism;Pyrimidinemetabolism[PATH:ko00240];codA;cytosinedeaminase[EC:3.5.4.1]                                                                              | -3.331975975 | 0.02302363  |
| Metabolism;Nucleotidemetabolism;Pyrimidinemetabolism[PATH:ko00240];DPO3D1.holA;DNAPolymeraseIIIsubunitdelta[EC:2.7.7.7]                                                            | -2.057134442 | 0.001769558 |

|                                                                                                                                                        |              |             |
|--------------------------------------------------------------------------------------------------------------------------------------------------------|--------------|-------------|
| Metabolism;Nucleotidemetabolism;Pyrimidinemetabolism[PATH:ko00240];DPO3E.dnaQ;DNAPolymeraseIIsubunitepsilon[EC:2.7.7.7]                                | -2.281934658 | 0.014968485 |
| Metabolism;Nucleotidemetabolism;Pyrimidinemetabolism[PATH:ko00240];E1.17.4.1A.nrdA.nrdE;ribonucleoside-diphosphatereductasealphachain[EC:1.17.4.1]     | -1.864005504 | 0.016073075 |
| Metabolism;Nucleotidemetabolism;Pyrimidinemetabolism[PATH:ko00240];E1.17.4.1B.nrdB.nrdF;ribonucleoside-diphosphatereductasebetachain[EC:1.17.4.1]      | -1.671837133 | 0.016557857 |
| Metabolism;Nucleotidemetabolism;Pyrimidinemetabolism[PATH:ko00240];E2.4.2.6;nucleosidedeoxyribosyltransferase[EC:2.4.2.6]                              | -5.649851152 | 2.54E-05    |
| Metabolism;Nucleotidemetabolism;Pyrimidinemetabolism[PATH:ko00240];pyrB.PYR2;aspartatecarbamoyltransferasecatalyticsubunit[EC:2.1.3.2]                 | 0.766457577  | 0.047424644 |
| Metabolism;Nucleotidemetabolism;Pyrimidinemetabolism[PATH:ko00240];pyrE;orotatephosphoribosyltransferase[EC:2.4.2.10]                                  | 1.328705156  | 0.002813251 |
| Metabolism;Nucleotidemetabolism;Pyrimidinemetabolism[PATH:ko00240];pyrR;pyrimidineoperonattenuationprotein/uracilphosphoribosyltransferase[EC:2.4.2.9] | -2.227924036 | 0.004861897 |
| Metabolism;Nucleotidemetabolism;Pyrimidinemetabolism[PATH:ko00240];rpoZ;DNA-directedRNAPolymerasesubunitomega[EC:2.7.7.6]                              | 1.140001556  | 0.003577006 |
| Metabolism;Nucleotidemetabolism;Pyrimidinemetabolism[PATH:ko00240];tdk.TK;thymidinekinase[EC:2.7.1.21]                                                 | -1.497942543 | 0.011295792 |
| Metabolism;Nucleotidemetabolism;Pyrimidinemetabolism[PATH:ko00240];tmk.DTYMK;dTMPkinase[EC:2.7.4.9]                                                    | -1.232727497 | 0.03859021  |
| Metabolism;Nucleotidemetabolism;Pyrimidinemetabolism[PATH:ko00240];udk.UCK;uridinekinase[EC:2.7.1.48]                                                  | -2.215277024 | 0.002602884 |
| Metabolism;Nucleotidemetabolism;Pyrimidinemetabolism[PATH:ko00240];udp.UPP;uridinephosphorylase[EC:2.4.2.3]                                            | -8.044482887 | 0.002872349 |
| Metabolism;Nucleotidemetabolism;Pyrimidinemetabolism[PATH:ko00240];upp.UPRT;uracilphosphoribosyltransferase[EC:2.4.2.9]                                | 1.001057449  | 0.014968485 |
| Metabolism;Nucleotidemetabolism;Pyrimidinemetabolism[PATH:ko00240];ushA;5'-nucleotidase/UDP-sugardiphosphatase[EC:3.1.3.53.6.1.45]                     | -11.14418291 | 0.003902356 |
| Metabolism;OverviewBiosynthesisofaminoacids[PATH:ko01230];argC;N-acetyl-gamma-glutamyl-phosphatereductase[EC:1.2.1.38]                                 | -3.656685122 | 0.004196998 |
| Metabolism;OverviewBiosynthesisofaminoacids[PATH:ko01230];argD;acetylornithine/N-succinyldiaminopimelateaminotransferase[EC:2.6.1.112.6.1.17]          | -11.79756423 | 0.009303631 |
| Metabolism;OverviewBiosynthesisofaminoacids[PATH:ko01230];argG.ASS1;argininosuccinatesynthase[EC:6.3.4.5]                                              | -2.488905339 | 0.001164129 |
| Metabolism;OverviewBiosynthesisofaminoacids[PATH:ko01230];argH.ASL;argininosuccinatelyase[EC:4.3.2.1]                                                  | -3.714692095 | 1.59E-05    |
| Metabolism;OverviewBiosynthesisofaminoacids[PATH:ko01230];aroA;3-phosphoshikimate1-carboxyvinyltransferase[EC:2.5.1.19]                                | 1.24780215   | 0.005802781 |
| Metabolism;OverviewBiosynthesisofaminoacids[PATH:ko01230];ARO A2.aroA;3-deoxy-7-phosphoheptulonatesynthase[EC:2.5.1.54]                                | -5.965682707 | 3.03E-05    |
| Metabolism;OverviewBiosynthesisofaminoacids[PATH:ko01230];aroB;3-dehydroquinatesynthase[EC:4.2.3.4]                                                    | 0.925983145  | 0.048249327 |
| Metabolism;OverviewBiosynthesisofaminoacids[PATH:ko01230];dapA;4-hydroxy-tetrahydrodipicolinatesynthase[EC:4.3.3.7]                                    | -1.322063751 | 0.038521461 |
| Metabolism;OverviewBiosynthesisofaminoacids[PATH:ko01230];dapB;4-hydroxy-tetrahydrodipicolinatereductase[EC:1.17.1.8]                                  | 1.3854821    | 2.54E-05    |
| Metabolism;OverviewBiosynthesisofaminoacids[PATH:ko01230];dapC;N-succinyldiaminopimelateaminotransferase[EC:2.6.1.17]                                  | -11.141225   | 0.001653568 |
| Metabolism;OverviewBiosynthesisofaminoacids[PATH:ko01230];E1.1.1.3;homoserinedehydrogenase[EC:1.1.1.3]                                                 | -1.457338016 | 0.02429635  |
| Metabolism;OverviewBiosynthesisofaminoacids[PATH:ko01230];E1.5.1.2.proC;pyrroline-5-carboxylatereductase[EC:1.5.1.2]                                   | -1.183816916 | 0.024547842 |
| Metabolism;OverviewBiosynthesisofaminoacids[PATH:ko01230];E2.2.1.2.talA.talB;transaldolase[EC:2.2.1.2]                                                 | -11.76644974 | 0.002995451 |
| Metabolism;OverviewBiosynthesisofaminoacids[PATH:ko01230];E2.6.1.42.ilvE;branched-chainaminoacidaminotransferase[EC:2.6.1.42]                          | -2.752257097 | 0.000346456 |
| Metabolism;OverviewBiosynthesisofaminoacids[PATH:ko01230];E2.7.1.71.aroK.aroL;shikimatekinase[EC:2.7.1.71]                                             | 1.050467488  | 0.021690776 |
| Metabolism;OverviewBiosynthesisofaminoacids[PATH:ko01230];E3.1.3.15B;histidinol-phosphatase(PHPfamily)[EC:3.1.3.15]                                    | -7.431575909 | 1.14E-08    |
| Metabolism;OverviewBiosynthesisofaminoacids[PATH:ko01230];ENO.eno;enolase[EC:4.2.1.11]                                                                 | -5.951624563 | 6.12E-05    |

|                                                                                                                                                  |              |             |
|--------------------------------------------------------------------------------------------------------------------------------------------------|--------------|-------------|
| Metabolism;OverviewBiosynthesisofaminoacids[PATH:ko01230];FBA.fbaA;fructose-bisphosphatealdolase.classII[EC:4.1.2.13]                            | -6.482770493 | 1.53E-05    |
| Metabolism;OverviewBiosynthesisofaminoacids[PATH:ko01230];GAPDH.gapA;glyceraldehyde3-phosphatedehydrogenase[EC:1.2.1.12]                         | -5.46010237  | 0.000134338 |
| Metabolism;OverviewBiosynthesisofaminoacids[PATH:ko01230];gltB;glutamatesynthase(NADPH/NADH)largechain[EC:1.4.1.131.4.1.14]                      | -7.841446025 | 0.000132326 |
| Metabolism;OverviewBiosynthesisofaminoacids[PATH:ko01230];gltD;glutamatesynthase(NADPH/NADH)smallchain[EC:1.4.1.131.4.1.14]                      | -12.19765424 | 0.00100271  |
| Metabolism;OverviewBiosynthesisofaminoacids[PATH:ko01230];glyA.SHMT;glycinehydroxymethyltransferase[EC:2.1.2.1]                                  | 1.57364268   | 6.61E-07    |
| Metabolism;OverviewBiosynthesisofaminoacids[PATH:ko01230];hisA;phosphoribosylformimino-5-aminoimidazolecarboxamideribotideisomerase[EC:5.3.1.16] | -1.487524168 | 0.046606821 |
| Metabolism;OverviewBiosynthesisofaminoacids[PATH:ko01230];hisB;imidazoleglycerol-phosphatedehydratase[EC:4.2.1.19]                               | -2.975566053 | 0.000500234 |
| Metabolism;OverviewBiosynthesisofaminoacids[PATH:ko01230];hisC;histidinol-phosphateaminotransferase[EC:2.6.1.9]                                  | -4.325886491 | 1.99E-06    |
| Metabolism;OverviewBiosynthesisofaminoacids[PATH:ko01230];hisD;histidinoldehydrogenase[EC:1.1.1.23]                                              | -2.518577829 | 0.001771241 |
| Metabolism;OverviewBiosynthesisofaminoacids[PATH:ko01230];hisE;phosphoribosyl-ATPpyrophosphohydrolase[EC:3.6.1.31]                               | -2.744707468 | 0.001947491 |
| Metabolism;OverviewBiosynthesisofaminoacids[PATH:ko01230];hisF;cyclase[EC:4.1.3.-]                                                               | -2.060923175 | 0.010567335 |
| Metabolism;OverviewBiosynthesisofaminoacids[PATH:ko01230];hisH;glutamineamidotransferase[EC:2.4.2.-]                                             | -2.214467993 | 0.004442549 |
| Metabolism;OverviewBiosynthesisofaminoacids[PATH:ko01230];hisI;phosphoribosyl-AMPcyclohydrolase[EC:3.5.4.19]                                     | -2.184568523 | 0.008514636 |
| Metabolism;OverviewBiosynthesisofaminoacids[PATH:ko01230];IDH1.IDH2.icd;isocitratehydrogenase[EC:1.1.1.42]                                       | -2.763414464 | 0.038521461 |
| Metabolism;OverviewBiosynthesisofaminoacids[PATH:ko01230];leuB;3-isopropylmalatedehydrogenase[EC:1.1.1.85]                                       | -1.446471659 | 0.024792564 |
| Metabolism;OverviewBiosynthesisofaminoacids[PATH:ko01230];leuD;3-isopropylmalate/(R)-2-methylmalatedehydratasesmallsubunit[EC:4.2.1.334.2.1.35]  | -2.749564252 | 0.000118783 |
| Metabolism;OverviewBiosynthesisofaminoacids[PATH:ko01230];lysC;aspartatekinase[EC:2.7.2.4]                                                       | -2.470426967 | 0.000868497 |
| Metabolism;OverviewBiosynthesisofaminoacids[PATH:ko01230];metC;cystathioninebeta-lyase[EC:4.4.1.8]                                               | 1.143510255  | 0.007708466 |
| Metabolism;OverviewBiosynthesisofaminoacids[PATH:ko01230];OTC.argF.argI;ornithinecarbamoyltransferase[EC:2.1.3.3]                                | -2.288340744 | 0.002121995 |
| Metabolism;OverviewBiosynthesisofaminoacids[PATH:ko01230];patA;aminotransferase[EC:2.6.1.-]                                                      | -3.048929303 | 3.84E-05    |
| Metabolism;OverviewBiosynthesisofaminoacids[PATH:ko01230];serA.PHGDH;D-3-phosphoglyceratedehydrogenase[EC:1.1.1.95]                              | -3.36727392  | 5.99E-05    |
| Metabolism;OverviewBiosynthesisofaminoacids[PATH:ko01230];serC.PSAT1;phosphoserineaminotransferase[EC:2.6.1.52]                                  | -2.871256379 | 0.000521046 |
| Metabolism;OverviewBiosynthesisofaminoacids[PATH:ko01230];thrA;bifunctionalaspertokinase/homoserinedehydrogenase1[EC:2.7.2.41.1.1.3]             | -13.32943573 | 0.014525754 |
| Metabolism;OverviewBiosynthesisofaminoacids[PATH:ko01230];thrB1;homoserinekinase[EC:2.7.1.39]                                                    | -1.925287818 | 0.00346328  |
| Metabolism;OverviewBiosynthesisofaminoacids[PATH:ko01230];trpC;indole-3-glycerolphosphatesynthase[EC:4.1.1.48]                                   | -4.542391636 | 0.000331713 |
| Metabolism;OverviewBiosynthesisofaminoacids[PATH:ko01230];trpF;p-hosphoribosylanthranilateisomerase[EC:5.3.1.24]                                 | 0.705447491  | 0.034342378 |
| Metabolism;OverviewCarbonmetabolism[PATH:ko01200];accB.bccP;acetyl-CoAcarboxylasebiotincarboxylcarrierprotein                                    | 0.846959361  | 0.049618655 |
| Metabolism;OverviewCarbonmetabolism[PATH:ko01200];aceE;pyruvatedehydrogenaseE1component[EC:1.2.4.1]                                              | -11.79245895 | 0.00766499  |
| Metabolism;OverviewCarbonmetabolism[PATH:ko01200];arcC;carbamatekinase[EC:2.7.2.2]                                                               | -11.15287326 | 0.003472935 |
| Metabolism;OverviewCarbonmetabolism[PATH:ko01200];DLD.lpd.pdhD;dihydrolipoamidedehydrogenase[EC:1.8.1.4]                                         | -6.375720181 | 2.61E-05    |
| Metabolism;OverviewCarbonmetabolism[PATH:ko01200];E2.2.1.2.talA.talB;transaldolase[EC:2.2.1.2]                                                   | -11.76644974 | 0.002995451 |
| Metabolism;OverviewCarbonmetabolism[PATH:ko01200];E2.3.1.9.atob;acetyl-CoA-acetyltransferase[EC:2.3.1.9]                                         | -3.373422428 | 0.00346328  |

|                                                                                                                                                                    |              |             |
|--------------------------------------------------------------------------------------------------------------------------------------------------------------------|--------------|-------------|
| Metabolism;OverviewCarbonmetabolism[PATH:ko01200];E2.7.1.12.gntK.idnK;gluconokinase[EC:2.7.1.12]                                                                   | -5.702007645 | 4.30E-05    |
| Metabolism;OverviewCarbonmetabolism[PATH:ko01200];E4.2.1.2B.fumC;fumaratehydratase.classII[EC:4.2.1.2]                                                             | -3.270061347 | 0.027939722 |
| Metabolism;OverviewCarbonmetabolism[PATH:ko01200];ENO.eno;enolase[EC:4.2.1.11]                                                                                     | -5.951624563 | 6.12E-05    |
| Metabolism;OverviewCarbonmetabolism[PATH:ko01200];fadJ;3-hydroxyacyl-CoAdehydrogenase/enoyl-CoAhydratase/3-hydroxybutyryl-CoAepimerase[EC:1.1.1.354.2.1.175.1.2.3] | -12.25582329 | 0.010739859 |
| Metabolism;OverviewCarbonmetabolism[PATH:ko01200];FBA.fbaA;fructose-bisphosphatealdolase.classII[EC:4.1.2.13]                                                      | -6.482770493 | 1.53E-05    |
| Metabolism;OverviewCarbonmetabolism[PATH:ko01200];FBP.fbp;fructose-1,6-bisphosphataseI[EC:3.1.3.11]                                                                | -11.79608401 | 0.008749896 |
| Metabolism;OverviewCarbonmetabolism[PATH:ko01200];fdoG.fdhH;formate dehydrogenase major subunit[EC:1.2.1.2]                                                        | -6.762554455 | 0.004407149 |
| Metabolism;OverviewCarbonmetabolism[PATH:ko01200];folD;methylenetetrahydrofolate dehydrogenase(NADP+)/methenyltetrahydrofolate cyclohydrolase[EC:1.5.1.53.5.4.9]   | 1.161964243  | 1.48E-06    |
| Metabolism;OverviewCarbonmetabolism[PATH:ko01200];frdA;fumarate reductase flavoprotein subunit[EC:1.3.5.4]                                                         | -3.39479139  | 0.012913123 |
| Metabolism;OverviewCarbonmetabolism[PATH:ko01200];G6PD.zwf;glucose-6-phosphate 1-dehydrogenase[EC:1.1.1.49]                                                        | -4.965135325 | 4.77E-07    |
| Metabolism;OverviewCarbonmetabolism[PATH:ko01200];GAPDH.gapA;glyceraldehyde 3-phosphate dehydrogenase[EC:1.2.1.12]                                                 | -5.46010237  | 0.000134338 |
| Metabolism;OverviewCarbonmetabolism[PATH:ko01200];gcvT.AMT;aminomethyltransferase[EC:2.1.2.10]                                                                     | -12.21984444 | 0.002190529 |
| Metabolism;OverviewCarbonmetabolism[PATH:ko01200];GLDC.gcvP;glycine dehydrogenase[EC:1.4.4.2]                                                                      | -8.292996831 | 0.024593612 |
| Metabolism;OverviewCarbonmetabolism[PATH:ko01200];glyA.SHMT;glycine hydroxymethyltransferase[EC:2.1.2.1]                                                           | 1.57364268   | 6.61E-07    |
| Metabolism;OverviewCarbonmetabolism[PATH:ko01200];IDH1.IDH2.icd;isocitrate dehydrogenase[EC:1.1.1.42]                                                              | -2.763414464 | 0.038521461 |
| Metabolism;OverviewCarbonmetabolism[PATH:ko01200];kdgK;2-dehydro-3-deoxygluconokinase[EC:2.7.1.45]                                                                 | -6.233354308 | 7.70E-08    |
| Metabolism;OverviewCarbonmetabolism[PATH:ko01200];metF.MTHFR;methylenetetrahydrofolate reductase(NADPH)[EC:1.5.1.20]                                               | -1.73540505  | 0.007781973 |
| Metabolism;OverviewCarbonmetabolism[PATH:ko01200];PGD.gnd;6-phosphogluconate dehydrogenase[EC:1.1.1.44]                                                            | -4.864027831 | 2.76E-07    |
| Metabolism;OverviewCarbonmetabolism[PATH:ko01200];pgl;6-phosphogluconolactonase[EC:3.1.1.31]                                                                       | -6.034832737 | 6.61E-07    |
| Metabolism;OverviewCarbonmetabolism[PATH:ko01200];ppdK;pyruvate orthophosphate dikinase[EC:2.7.9.1]                                                                | -9.358232779 | 0.000641867 |
| Metabolism;OverviewCarbonmetabolism[PATH:ko01200];pps.ppsA;pyruvate water dikinase[EC:2.7.9.2]                                                                     | -3.962193451 | 0.029219419 |
| Metabolism;OverviewCarbonmetabolism[PATH:ko01200];sdhB;succinate dehydrogenase iron-sulfur subunit[EC:1.3.5.1]                                                     | -9.543035019 | 0.016387029 |
| Metabolism;OverviewCarbonmetabolism[PATH:ko01200];serA.PHGDH;D-3-phosphoglycerate dehydrogenase[EC:1.1.1.95]                                                       | -3.36727392  | 5.99E-05    |
| Metabolism;OverviewCarbonmetabolism[PATH:ko01200];serC.PSAT1;phosphoserine aminotransferase[EC:2.6.1.52]                                                           | -2.871256379 | 0.000521046 |
| Metabolism;OverviewDegradation of aromatic compounds[PATH:ko01220];adhE;acetaldehyde dehydrogenase/alcohol dehydrogenase[EC:1.2.1.10.1.1.1.1]                      | -2.237328876 | 0.038521461 |
| Metabolism;OverviewDegradation of aromatic compounds[PATH:ko01220];adhP;alcohol dehydrogenase propanol-preferring[EC:1.1.1.1]                                      | -3.523029673 | 2.61E-05    |
| Metabolism;OverviewDegradation of aromatic compounds[PATH:ko01220];hcaD;3-phenylpropionate/trans-cinnamate dioxygenase ferredoxin reductase subunit[EC:1.18.1.3]   | -11.80808924 | 0.015307575 |
| Metabolism;OverviewDegradation of aromatic compounds[PATH:ko01220];pcaC;4-carboxy muconolactone decarboxylase[EC:4.1.1.44]                                         | -11.2802081  | 0.000379071 |
| Metabolism;OverviewFatty acid metabolism[PATH:ko01212];accB.bccP;acetyl-CoA carboxylase biotin carrier protein                                                     | 0.846959361  | 0.049618655 |
| Metabolism;OverviewFatty acid metabolism[PATH:ko01212];E2.3.1.9.at oB;acetyl-CoA acetyltransferase[EC:2.3.1.9]                                                     | -3.373422428 | 0.00346328  |
| Metabolism;OverviewFatty acid metabolism[PATH:ko01212];fabI;enoyl-acyl-carrier protein reductase I[EC:1.3.1.91.3.1.10]                                             | -4.200496577 | 0.026264115 |

|                                                                                                                                                                       |              |             |
|-----------------------------------------------------------------------------------------------------------------------------------------------------------------------|--------------|-------------|
| Metabolism;OverviewFattyacidmetabolism[PATH:ko01212];fadJ;3-hydroxyacyl-CoAdehydrogenase/enoyl-CoAhydratase/3-hydroxybutyryl-CoAepimerase[EC:1.1.1.354.2.1.175.1.2.3] | -12.25582329 | 0.010739859 |
| Metabolism;OverviewOxocarboxylicacidmetabolism[PATH:ko01210];argC;N-acetyl-gamma-glutamyl-phosphatereductase[EC:1.2.1.38]                                             | -3.656685122 | 0.004196998 |
| Metabolism;OverviewOxocarboxylicacidmetabolism[PATH:ko01210];argD;acetylornithine/N-succinyldiaminopimelateaminotransferase[EC:2.6.1.112.6.1.17]                      | -11.79756423 | 0.009303631 |
| Metabolism;OverviewOxocarboxylicacidmetabolism[PATH:ko01210];E2.6.1.42.ilvE;branched-chainaminoacidaminotransferase[EC:2.6.1.42]                                      | -2.752257097 | 0.000346456 |
| Metabolism;OverviewOxocarboxylicacidmetabolism[PATH:ko01210];IDH1.IDH2.icd;isocitratehydrogenase[EC:1.1.1.42]                                                         | -2.763414464 | 0.038521461 |
| Metabolism;OverviewOxocarboxylicacidmetabolism[PATH:ko01210];leuB;3-isopropylmalatedehydrogenase[EC:1.1.1.85]                                                         | -1.446471659 | 0.024792564 |
| Metabolism;OverviewOxocarboxylicacidmetabolism[PATH:ko01210];leuD;3-isopropylmalate/(R)-2-methylmalatedehydratasesmallsubunit[EC:4.2.1.334.2.1.35]                    | -2.749564252 | 0.000118783 |
| Metabolism;OverviewOxocarboxylicacidmetabolism[PATH:ko01210];lysC;aspartatekinase[EC:2.7.2.4]                                                                         | -2.470426967 | 0.000868497 |
| Organismalsystem;Cellmobility;Bacterialchemotaxis[PATH:ko02030];cheR;chemotaxisproteinmethyltransferaseCheR[EC:2.1.1.80]                                              | -13.11070865 | 0.003472935 |
| Organismalsystem;Cellmobility;Bacterialchemotaxis[PATH:ko02030];cheV;two-componentsystem.chemotaxisfamily.responseregulatorCheV                                       | -11.80327053 | 0.012048496 |
| Organismalsystem;Cellmobility;Bacterialchemotaxis[PATH:ko02030];malE;maltose/maltodextrintransportsystemsubstrate-bindingprotein                                      | -7.030153597 | 0.001616572 |
| Organismalsystem;Cellmobility;Bacterialchemotaxis[PATH:ko02030];mcp;methyl-acceptingchemotaxisprotein                                                                 | -4.13974575  | 0.043106084 |
| Organismalsystem;Cellmobility;Bacterialchemotaxis[PATH:ko02030];rbsB;ribosetransportsystemsubstrate-bindingprotein                                                    | -6.526422376 | 1.42E-08    |
| Organismalsystem;Cellmobility;Bacterialchemotaxis[PATH:ko02030];trg;methyl-acceptingchemotaxisproteinIII.riboseandgalactosesensorreceptor                             | -13.0990089  | 0.001572765 |

\*Negative fold changes indicate genes up-regulated in cheese ripened at higher temperature.

**Table S5.** Description of the samples analysed in the two experiments carried out in this study.

| <b>Sample ID</b>         | <b>Description</b>                                                            | <b>Ripening conditions</b> | <b>RNA-seq*</b> |
|--------------------------|-------------------------------------------------------------------------------|----------------------------|-----------------|
| <i>First experiment</i>  |                                                                               |                            |                 |
| <b>RM</b>                | Raw Milk                                                                      | NA                         | yes             |
| <b>TM</b>                | Thermized Milk                                                                | NA                         | yes             |
| <b>NWC</b>               | Natural Whey Culture                                                          | NA                         | yes             |
| <b>Cu</b>                | Curd before stretching                                                        | NA                         | yes             |
| <b>Mol</b>               | Cheese after molding                                                          | NA                         | yes             |
| <b>t0.CO</b>             | Cheese after brining and drying, before entering the ripening chamber - core  | NA                         | yes             |
| <b>t0.CR</b>             | Cheese after brining and drying, before entering the ripening chamber - crust | NA                         | yes             |
| <b>t10.CO</b>            | Ripened cheese at 10 days - core                                              | Standard                   | yes             |
| <b>t10.CR</b>            | Ripened cheese at 10 days - crust                                             | Standard                   | yes             |
| <b>t20.CO</b>            | Ripened cheese at 20 days - core                                              | Standard                   | yes             |
| <b>t20.CR</b>            | Ripened cheese at 20 days - crust                                             | Standard                   | yes             |
| <b>t30.CO</b>            | Ripened cheese at 30 days - core                                              | Standard                   | yes             |
| <b>t30.CR</b>            | Ripened cheese at 30 days - crust                                             | Standard                   | yes             |
| <b>t60.CO</b>            | Ripened cheese at 60 days - core                                              | Standard                   | yes             |
| <b>t60.CR</b>            | Ripened cheese at 60 days - crust                                             | Standard                   | yes             |
| <i>Second experiment</i> |                                                                               |                            |                 |
| <b>RM</b>                | Raw Milk                                                                      | NA                         | yes             |
| <b>TM</b>                | Thermized Milk                                                                | NA                         | yes             |
| <b>NWC</b>               | Natural Whey Culture                                                          | NA                         | yes             |



---

|                 |                                                                               |                    |     |
|-----------------|-------------------------------------------------------------------------------|--------------------|-----|
| <b>Cu</b>       | Curd before stretching                                                        | NA                 | yes |
| <b>Mol</b>      | Cheese after molding                                                          | NA                 | yes |
| <b>t0.CO</b>    | Cheese after brining and drying, before entering the ripening chamber - core  | NA                 | yes |
| <b>t0.CR</b>    | Cheese after brining and drying, before entering the ripening chamber - crust | NA                 | yes |
| <b>t10.CO.A</b> | Ripened cheese at 10 days - core                                              | Standard           | yes |
| <b>t10.CO.B</b> | Ripened cheese at 10 days - core                                              | Higher temperature | yes |
| <b>t10.CO.C</b> | Ripened cheese at 10 days - core                                              | Lower RH           | no  |
| <b>t10.CR.A</b> | Ripened cheese at 10 days - crust                                             | Standard           | yes |
| <b>t10.CR.B</b> | Ripened cheese at 10 days - crust                                             | Higher temperature | yes |
| <b>t10.CR.C</b> | Ripened cheese at 10 days - crust                                             | Lower RH           | no  |
| <b>t20.CO.A</b> | Ripened cheese at 20 days - core                                              | Standard           | no  |
| <b>t20.CO.B</b> | Ripened cheese at 20 days - core                                              | Higher temperature | yes |
| <b>t20.CO.C</b> | Ripened cheese at 20 days - core                                              | Lower RH           | no  |
| <b>t20.CR.A</b> | Ripened cheese at 20 days - crust                                             | Standard           | no  |
| <b>t20.CR.B</b> | Ripened cheese at 20 days - crust                                             | Higher temperature | yes |
| <b>t20.CR.C</b> | Ripened cheese at 20 days - crust                                             | Lower RH           | no  |
| <b>t30.CO.A</b> | Ripened cheese at 30 days - core                                              | Standard           | yes |
| <b>t30.CO.B</b> | Ripened cheese at 30 days - core                                              | Higher temperature | yes |
| <b>t30.CO.C</b> | Ripened cheese at 30 days - core                                              | Lower RH           | no  |
| <b>t30.CR.A</b> | Ripened cheese at 30 days - crust                                             | Standard           | yes |
| <b>t30.CR.B</b> | Ripened cheese at 60 days - crust                                             | Higher temperature | yes |
| <b>t30.CR.C</b> | Ripened cheese at 10 days - crust                                             | Lower RH           | no  |

---

NA: not applicable; Standard: ripening at 16°C and 75% RH. Higher temperature: ripening at 20°C and 75% RH. Lower RH: ripening at 16°C and 65% RH. \*16S rRNA sequencing was carried out for all the samples of both the experiments.

**Table S6.** Bacterial genomes included in the reference database used in this study.

| <b>Genomes</b>                                                               | <b>NCBI genome ID</b> |
|------------------------------------------------------------------------------|-----------------------|
| <b>downloaded from the NCBI RefSeq database</b>                              |                       |
| <i>Enterobacter aerogenes</i> KCTC 2190                                      | NC_015663.1           |
| <i>Enterobacter cloacae</i> EcWSU1                                           | NC_016514.1           |
| <i>Enterobacter cloacae</i> EcWSU1, plasmid pEcWSU1_A                        | NC_016515.1           |
| <i>Enterobacter cloacae</i> SCF1                                             | NC_014618.1           |
| <i>Enterobacter cloacae</i> subsp. <i>cloacae</i> ATCC 13047                 | NC_014121.1           |
| <i>Enterobacter cloacae</i> subsp. <i>cloacae</i> ATCC 13047, plasmid pECL_A | NC_014107.1           |
| <i>Enterobacter cloacae</i> subsp. <i>cloacae</i> ATCC 13047, plasmid pECL_B | NC_014108.1           |
| <i>Enterococcus faecalis</i> V583                                            | NC_004668.1           |
| <i>Enterococcus faecalis</i> V583, plasmid pTEF1                             | NC_004669.1           |
| <i>Enterococcus faecalis</i> V583, plasmid pTEF2                             | NC_004671.1           |
| <i>Enterococcus faecalis</i> V583, plasmid pTEF3                             | NC_004670.1           |
| <i>Erwinia amylovorans</i> CFBP1430                                          | NC_013961.1           |
| <i>Erwinia amylovorans</i> CFBP1430, plasmid pEA29                           | NC_013957.1           |
| <i>Erwinia billingiae</i> Eb661                                              | NC_014306.1           |
| <i>Erwinia billingiae</i> Eb661, plasmid pEB102                              | NC_014304.1           |
| <i>Erwinia billingiae</i> Eb661, plasmid pEB170                              | NC_014305.1           |
| <i>Erwinia pyrifoliae</i> Ep1/96                                             | NC_012214.1           |
| <i>Erwinia pyrifoliae</i> Ep1/96, plasmid pEP03                              | NC_013264.1           |
| <i>Erwinia pyrifoliae</i> Ep1/96, plasmid pEP05                              | NC_013265.1           |
| <i>Erwinia pyrifoliae</i> Ep1/96, plasmid pEP2.6                             | NC_013954.1           |
| <i>Erwinia pyrifoliae</i> Ep1/96, plasmid pEP36                              | NC_013263.1           |
| <i>Erwinia tasmaniensis</i> Et1/99                                           | NC_010694.1           |
| <i>Erwinia tasmaniensis</i> Et1/99, plasmid pET09                            | NC_010695.1           |
| <i>Erwinia tasmaniensis</i> Et1/99, plasmid pET35                            | NC_010696.1           |
| <i>Erwinia tasmaniensis</i> Et1/99, plasmid pET45                            | NC_010699.1           |
| <i>Erwinia tasmaniensis</i> Et1/99, plasmid pET46                            | NC_010693.1           |
| <i>Erwinia tasmaniensis</i> Et1/99, plasmid pET49                            | NC_010697.1           |
| <i>Escherichia coli</i> 536                                                  | NC_008253.1           |
| <i>Escherichia coli</i> ATCC 8739                                            | NC_010468.1           |
| <i>Escherichia coli</i> CF073                                                | NC_004431.1           |
| <i>Escherichia coli</i> K12 substr. DH10B                                    | NC_010473.1           |
| <i>Escherichia coli</i> K-12 substr. W3110                                   | NC_007779.1           |

---

|                                                             |             |
|-------------------------------------------------------------|-------------|
| <i>Escherichia coli</i> O157:H7                             | NC_002655.2 |
| <i>Lactobacillus acidophilus</i> 30SC                       | NC_015214.1 |
| <i>Lactobacillus acidophilus</i> 30SC, plasmid pRKC30SC1    | NC_015213.1 |
| <i>Lactobacillus acidophilus</i> 30SC, plasmid pRKC30SC2    | NC_015218.1 |
| <i>Lactobacillus acidophilus</i> La-14                      | NC_021181.2 |
| <i>Lactobacillus acidophilus</i> NCFM                       | NC_006814.3 |
| <i>Lactobacillus brevis</i> ATCC367                         | NC_008497.1 |
| <i>Lactobacillus brevis</i> ATCC367, plasmid 1              | NC_008498.1 |
| <i>Lactobacillus brevis</i> ATCC367, plasmid 2              | NC_008499.1 |
| <i>Lactobacillus brevis</i> KB290                           | NC_020819.1 |
| <i>Lactobacillus brevis</i> KB290, plasmid pKB290-1         | NC_020820.1 |
| <i>Lactobacillus brevis</i> KB290, plasmid pKB290-2         | NC_020821.1 |
| <i>Lactobacillus brevis</i> KB290, plasmid pKB290-3         | NC_020826.1 |
| <i>Lactobacillus brevis</i> KB290, plasmid pKB290-4         | NC_020822.1 |
| <i>Lactobacillus brevis</i> KB290, plasmid pKB290-5         | NC_020823.1 |
| <i>Lactobacillus brevis</i> KB290, plasmid pKB290-6         | NC_020827.1 |
| <i>Lactobacillus brevis</i> KB290, plasmid pKB290-7         | NC_020824.1 |
| <i>Lactobacillus brevis</i> KB290, plasmid pKB290-8         | NC_020828.1 |
| <i>Lactobacillus brevis</i> KB290, plasmid pKB290-9         | NC_020825.1 |
| <i>Lactobacillus buchneri</i> CD034                         | NC_018610.1 |
| <i>Lactobacillus buchneri</i> CD034, plasmid pCD034-1       | NC_016035.1 |
| <i>Lactobacillus buchneri</i> CD034, plasmid pCD034-2       | NC_016034.1 |
| <i>Lactobacillus buchneri</i> CD034, plasmid pCD034-3       | NC_018611.1 |
| <i>Lactobacillus buchneri</i> NRRL B-30929                  | NC_015428.1 |
| <i>Lactobacillus buchneri</i> NRRL B-30929, plasmid pLBUC01 | NC_015420.1 |
| <i>Lactobacillus buchneri</i> NRRL B-30929, plasmid pLBUC02 | NC_015429.1 |
| <i>Lactobacillus buchneri</i> NRRL B-30929, plasmid pLBUC03 | NC_015421.1 |
| <i>Lactobacillus casei</i> ATCC334                          | NC_008526.1 |
| <i>Lactobacillus casei</i> ATCC334, plasmid 1               | NC_008502.1 |
| <i>Lactobacillus casei</i> BD-II                            | NC_017474.1 |
| <i>Lactobacillus casei</i> BD-II, plasmid pBD-II            | NC_017476.1 |
| <i>Lactobacillus casei</i> BL23                             | NC_010999.1 |
| <i>Lactobacillus casei</i> LC2W                             | NC_017473.1 |
| <i>Lactobacillus casei</i> LC2W, plasmid pLC2W              | NC_017475.1 |
| <i>Lactobacillus casei</i> LOCK919                          | NC_021721.1 |

---

---

|                                                                                 |             |
|---------------------------------------------------------------------------------|-------------|
| <i>Lactobacillus casei</i> LOCK919, plasmid pLOCK919                            | NC_021722.1 |
| <i>Lactobacillus casei</i> str. Zhang                                           | NC_014334.1 |
| <i>Lactobacillus casei</i> str. Zhang, plasmid plca36                           | NC_011352.1 |
| <i>Lactobacillus casei</i> W56                                                  | NC_018641.1 |
| <i>Lactobacillus casei</i> W56, plasmid pW56                                    | NC_020057.1 |
| <i>Lactobacillus crispatus</i> ST1                                              | NC_014106.1 |
| <i>Lactobacillus delbrueckii</i> subsp. <i>bulgaricus</i> 2038                  | NC_017469.1 |
| <i>Lactobacillus delbrueckii</i> subsp. <i>bulgaricus</i> ATCC 11842            | NC_008054.1 |
| <i>Lactobacillus delbrueckii</i> subsp. <i>bulgaricus</i> ATCC BAA-365          | NC_008529.1 |
| <i>Lactobacillus delbrueckii</i> subsp. <i>bulgaricus</i> ND02                  | NC_014727.1 |
| <i>Lactobacillus delbrueckii</i> subsp. <i>bulgaricus</i> ND02, plasmid unnamed | NC_014728.1 |
| <i>Lactobacillus fermentum</i> CECT 5716                                        | NC_017465.1 |
| <i>Lactobacillus fermentum</i> F-6                                              | NC_021235.1 |
| <i>Lactobacillus fermentum</i> IFO 3956                                         | NC_010610.1 |
| <i>Lactobacillus gasseri</i> ATCC 33323                                         | NC_008530.1 |
| <i>Lactobacillus helveticus</i> CNRZ32                                          | NC_021744.1 |
| <i>Lactobacillus helveticus</i> DPC 4571                                        | NC_010080.1 |
| <i>Lactobacillus helveticus</i> H10                                             | NC_017467.1 |
| <i>Lactobacillus helveticus</i> H10, plasmid pH10                               | NC_017468.1 |
| <i>Lactobacillus helveticus</i> R0052                                           | NC_018528.1 |
| <i>Lactobacillus johnsonii</i> FI9785                                           | NC_012552.1 |
| <i>Lactobacillus johnsonii</i> DPC 6026                                         | NC_017477.1 |
| <i>Lactobacillus johnsonii</i> FI9785                                           | NC_013504.1 |
| <i>Lactobacillus johnsonii</i> FI9786, plasmid p9785L                           | NC_013505.1 |
| <i>Lactobacillus johnsonii</i> N6.2                                             | NC_022909.1 |
| <i>Lactobacillus johnsonii</i> NCC533                                           | NC_005362.1 |
| <i>Lactobacillus kefiranofaciens</i> ZW3                                        | NC_015602.1 |
| <i>Lactobacillus kefiranofaciens</i> ZW3, plasmid pWW1                          | NC_015598.1 |
| <i>Lactobacillus kefiranofaciens</i> ZW3, plasmid pWW2                          | NC_015603.1 |
| <i>Lactobacillus paracasei</i> subsp. <i>paracasei</i> 8700:2                   | NC_022112.1 |
| <i>Lactobacillus paracasei</i> subsp. <i>paracasei</i> 8700:2, plasmid 1        | NC_022114.1 |
| <i>Lactobacillus paracasei</i> subsp. <i>paracasei</i> 8700:2, plasmid 2        | NC_022123.1 |
| <i>Lactobacillus plantarum</i> 16                                               | NC_021514.1 |
| <i>Lactobacillus plantarum</i> 16, plasmid Lp16A                                | NC_021515.1 |
| <i>Lactobacillus plantarum</i> 16, plasmid Lp16B                                | NC_021525.1 |

---

---

|                                                                                |             |
|--------------------------------------------------------------------------------|-------------|
| <i>Lactobacillus plantarum</i> 16, plasmid Lp16C                               | NC_021516.1 |
| <i>Lactobacillus plantarum</i> 16, plasmid Lp16D                               | NC_021526.1 |
| <i>Lactobacillus plantarum</i> 16, plasmid Lp16E                               | NC_021517.1 |
| <i>Lactobacillus plantarum</i> 16, plasmid Lp16F                               | NC_021518.1 |
| <i>Lactobacillus plantarum</i> 16, plasmid Lp16G                               | NC_021527.1 |
| <i>Lactobacillus plantarum</i> 16, plasmid Lp16H                               | NC_021519.1 |
| <i>Lactobacillus plantarum</i> 16, plasmid Lp16I                               | NC_021528.1 |
| <i>Lactobacillus plantarum</i> 16, plasmid Lp16L                               | NC_021520.1 |
| <i>Lactobacillus plantarum</i> JDM1                                            | NC_012984.1 |
| <i>Lactobacillus plantarum</i> subsp. <i>plantarum</i> P-8                     | NC_021224.1 |
| <i>Lactobacillus plantarum</i> subsp. <i>plantarum</i> P-8, plasmid LBPP1      | NC_021233.1 |
| <i>Lactobacillus plantarum</i> subsp. <i>plantarum</i> P-8, plasmid LBPP2      | NC_021225.1 |
| <i>Lactobacillus plantarum</i> subsp. <i>plantarum</i> P-8, plasmid LBPP3      | NC_021226.1 |
| <i>Lactobacillus plantarum</i> subsp. <i>plantarum</i> P-8, plasmid LBPP4      | NC_021234.1 |
| <i>Lactobacillus plantarum</i> subsp. <i>plantarum</i> P-8, plasmid LBPP5      | NC_021227.1 |
| <i>Lactobacillus plantarum</i> subsp. <i>plantarum</i> P-8, plasmid LBPP6      | NC_021228.1 |
| <i>Lactobacillus plantarum</i> subsp. <i>plantarum</i> ST-III                  | NC_014554.1 |
| <i>Lactobacillus plantarum</i> subsp. <i>plantarum</i> ST-III, plasmid pST-III | NC_014558.2 |
| <i>Lactobacillus plantarum</i> WCFS1                                           | NC_004567.2 |
| <i>Lactobacillus plantarum</i> WCFS1, plasmid pWCFS101                         | NC_006375.1 |
| <i>Lactobacillus plantarum</i> WCFS1, plasmid pWCFS102                         | NC_006376.1 |
| <i>Lactobacillus plantarum</i> WCFS1, plasmid pWCFS103                         | NC_006377.1 |
| <i>Lactobacillus plantarum</i> ZJ316                                           | NC_020229.1 |
| <i>Lactobacillus plantarum</i> ZJ316, plasmid pLP-ZJ101                        | NC_021903.1 |
| <i>Lactobacillus plantarum</i> ZJ316, plasmid pLP-ZJ102                        | NC_021904.1 |
| <i>Lactobacillus plantarum</i> ZJ316, plasmid pLP-ZJ103                        | NC_021912.1 |
| <i>Lactobacillus reuteri</i> DSM20016                                          | NC_009513.1 |
| <i>Lactobacillus reuteri</i> I5007                                             | NC_021494.1 |
| <i>Lactobacillus reuteri</i> I5007, plasmid pLRI01                             | NC_021503.1 |
| <i>Lactobacillus reuteri</i> I5007, plasmid pLRI02                             | NC_021496.1 |
| <i>Lactobacillus reuteri</i> I5007, plasmid pLRI03                             | NC_021495.1 |
| <i>Lactobacillus reuteri</i> I5007, plasmid pLRI04                             | NC_021504.1 |
| <i>Lactobacillus reuteri</i> I5007, plasmid pLRI05                             | NC_021497.1 |
| <i>Lactobacillus reuteri</i> I5007, plasmid pLRI06                             | NC_021498.1 |
| <i>Lactobacillus reuteri</i> JCM 1112                                          | NC_010609.1 |

---

---

|                                                                      |             |
|----------------------------------------------------------------------|-------------|
| <i>Lactobacillus reuteri</i> SD2112                                  | NC_015697.1 |
| <i>Lactobacillus reuteri</i> SD2112, plasmid pLR580                  | NC_015699.1 |
| <i>Lactobacillus reuteri</i> SD2112, plasmid pLR581                  | NC_015700.1 |
| <i>Lactobacillus reuteri</i> SD2112, plasmid pLR584                  | NC_015701.1 |
| <i>Lactobacillus reuteri</i> SD2112, plasmid pLR585                  | NC_015698.1 |
| <i>Lactobacillus reuteri</i> TD1                                     | NC_021872.1 |
| <i>Lactobacillus rhamnosus</i> ATCC 8530                             | NC_017491.1 |
| <i>Lactobacillus rhamnosus</i> GG ATCC 53103                         | NC_017482.1 |
| <i>Lactobacillus rhamnosus</i> Lc 705                                | NC_013199.1 |
| <i>Lactobacillus rhamnosus</i> Lc 705, plasmid pLC1                  | NC_013200.1 |
| <i>Lactobacillus rhamnosus</i> LOCK900                               | NC_021723.1 |
| <i>Lactobacillus rhamnosus</i> LOCK908                               | NC_021725.1 |
| <i>Lactobacillus ruminis</i> ATCC 27782                              | NC_015975.1 |
| <i>Lactobacillus sakei</i> subsp. <i>sakei</i> 23K                   | NC_007576.1 |
| <i>Lactobacillus salivarius</i> CECT 5713                            | NC_017481.1 |
| <i>Lactobacillus salivarius</i> CECT 5713, plasmid pHN1              | NC_017479.1 |
| <i>Lactobacillus salivarius</i> CECT 5713, plasmid pHN2              | NC_017480.1 |
| <i>Lactobacillus salivarius</i> CECT 5713, plasmid pHN3              | NC_017499.1 |
| <i>Lactobacillus salivarius</i> UCC118                               | NC_007929.1 |
| <i>Lactobacillus salivarius</i> UCC118, plasmid pMP118               | NC_007930.1 |
| <i>Lactobacillus salivarius</i> UCC118, plasmid pSF118-20            | NC_006529.1 |
| <i>Lactobacillus salivarius</i> UCC118, plasmid pSF118-44            | NC_006530.1 |
| <i>Lactobacillus sanfranciscensis</i> TMW 11.304                     | NC_015978.1 |
| <i>Lactobacillus sanfranciscensis</i> TMW 11.304, plasmid pLS1       | NC_015979.1 |
| <i>Lactobacillus sanfranciscensis</i> TMW 11.304, plasmid pLS2       | NC_015980.1 |
| <i>Lactococcus garviae</i> ATCC 49156                                | NC_015930.1 |
| <i>Lactococcus garviae</i> Lg2                                       | NC_017490.1 |
| <i>Lactococcus lactis</i> subsp. <i>cremoris</i> A76                 | NC_017492.1 |
| <i>Lactococcus lactis</i> subsp. <i>cremoris</i> A76, plasmid pQA504 | NC_017497.1 |
| <i>Lactococcus lactis</i> subsp. <i>cremoris</i> A76, plasmid pQA518 | NC_017495.1 |
| <i>Lactococcus lactis</i> subsp. <i>cremoris</i> A76, plasmid pQA549 | NC_017493.1 |
| <i>Lactococcus lactis</i> subsp. <i>cremoris</i> A76, plasmid pQA554 | NC_017496.1 |
| <i>Lactococcus lactis</i> subsp. <i>cremoris</i> KW2                 | NC_022369.1 |
| <i>Lactococcus lactis</i> subsp. <i>cremoris</i> MG1363              | NC_009004.1 |
| <i>Lactococcus lactis</i> subsp. <i>cremoris</i> NZ9000              | NC_017949.1 |

---

---

|                                                                         |             |
|-------------------------------------------------------------------------|-------------|
| <i>Lactococcus lactis</i> subsp. <i>cremoris</i> plasmid 1              | NC_008503.1 |
| <i>Lactococcus lactis</i> subsp. <i>cremoris</i> plasmid 2              | NC_008504.1 |
| <i>Lactococcus lactis</i> subsp. <i>cremoris</i> plasmid 3              | NC_008505.1 |
| <i>Lactococcus lactis</i> subsp. <i>cremoris</i> plasmid 4              | NC_008506.1 |
| <i>Lactococcus lactis</i> subsp. <i>cremoris</i> plasmid 5              | NC_008507.1 |
| <i>Lactococcus lactis</i> subsp. <i>cremoris</i> SK11                   | NC_008527.1 |
| <i>Lactococcus lactis</i> subsp. <i>cremoris</i> UC509.9                | NC_019435.1 |
| <i>Lactococcus lactis</i> subsp. <i>cremoris</i> UC509.9, plasmid pCIS1 | NC_019438.1 |
| <i>Lactococcus lactis</i> subsp. <i>cremoris</i> UC509.9, plasmid pCIS2 | NC_019434.1 |
| <i>Lactococcus lactis</i> subsp. <i>cremoris</i> UC509.9, plasmid pCIS3 | NC_019433.1 |
| <i>Lactococcus lactis</i> subsp. <i>cremoris</i> UC509.9, plasmid pCIS4 | NC_019437.1 |
| <i>Lactococcus lactis</i> subsp. <i>cremoris</i> UC509.9, plasmid pCIS5 | NC_019432.1 |
| <i>Lactococcus lactis</i> subsp. <i>cremoris</i> UC509.9, plasmid pCIS6 | NC_019436.1 |
| <i>Lactococcus lactis</i> subsp. <i>cremoris</i> UC509.9, plasmid pCIS7 | NC_019431.1 |
| <i>Lactococcus lactis</i> subsp. <i>cremoris</i> UC509.9, plasmid pCIS8 | NC_019430.1 |
| <i>Lactococcus lactis</i> subsp. <i>lactis</i> CV56                     | NC_017486.1 |
| <i>Lactococcus lactis</i> subsp. <i>lactis</i> CV56, plasmid pCV56A     | NC_017483.1 |
| <i>Lactococcus lactis</i> subsp. <i>lactis</i> CV56, plasmid pCV56B     | NC_017487.1 |
| <i>Lactococcus lactis</i> subsp. <i>lactis</i> CV56, plasmid pCV56C     | NC_017484.1 |
| <i>Lactococcus lactis</i> subsp. <i>lactis</i> CV56, plasmid pCV56D     | NC_017485.1 |
| <i>Lactococcus lactis</i> subsp. <i>lactis</i> CV56, plasmid pCV56E     | NC_017488.1 |
| <i>Lactococcus lactis</i> subsp. <i>lactis</i> II1403                   | NC_002662.1 |
| <i>Lactococcus lactis</i> subsp. <i>lactis</i> IO-1                     | NC_020450.1 |
| <i>Lactococcus lactis</i> subsp. <i>lactis</i> KF147                    | NC_013656.1 |
| <i>Lactococcus lactis</i> subsp. <i>lactis</i> KF148, plasmid pKF147A   | NC_013657.1 |
| <i>Lactococcus lactis</i> subsp. <i>lactis</i> KLDS 4.0325              | NC_022593.1 |
| <i>Leuconostoc carnosum</i> JB16                                        | NC_018673.1 |
| <i>Leuconostoc carnosum</i> JB16, plasmid pKLC1                         | NC_018674.1 |
| <i>Leuconostoc carnosum</i> JB16, plasmid pKLC2                         | NC_018698.1 |
| <i>Leuconostoc carnosum</i> JB16, plasmid pKLC3                         | NC_018675.1 |
| <i>Leuconostoc carnosum</i> JB16, plasmid pKLC4                         | NC_018699.1 |
| <i>Leuconostoc citreum</i> KM20                                         | NC_010471.1 |
| <i>Leuconostoc citreum</i> KM20, plasmid pLCK1                          | NC_010470.1 |
| <i>Leuconostoc citreum</i> KM20, plasmid pLCK2                          | NC_010466.1 |
| <i>Leuconostoc citreum</i> KM20, plasmid pLCK3                          | NC_010467.1 |

---

---

|                                                                                        |             |
|----------------------------------------------------------------------------------------|-------------|
| <i>Leuconostoc citreum</i> KM20, plasmid pLCK4                                         | NC_010469.1 |
| <i>Leuconostoc gasicomitatum</i> LMG 18811                                             | NC_014319.1 |
| <i>Leuconostoc gelidum</i> JB7                                                         | NC_018631.1 |
| <i>Leuconostoc kimkii</i> IMSNU 11154                                                  | NC_014136.1 |
| <i>Leuconostoc kimkii</i> IMSNU 11154, plasmid LkipL4701                               | NC_014131.1 |
| <i>Leuconostoc kimkii</i> IMSNU 11154, plasmid LkipL4704                               | NC_014132.1 |
| <i>Leuconostoc kimkii</i> IMSNU 11154, plasmid LkipL4719                               | NC_014133.1 |
| <i>Leuconostoc kimkii</i> IMSNU 11154, plasmid LkipL4726                               | NC_014134.1 |
| <i>Leuconostoc kimkii</i> IMSNU 11154, plasmid LkipL48                                 | NC_014135.1 |
| <i>Leuconostoc mesenteroides</i> subsp. <i>mesenteroides</i> ATCC8293                  | NC_008531.1 |
| <i>Leuconostoc mesenteroides</i> subsp. <i>mesenteroides</i> ATCC8293, plasmid pLEUM 1 | NC_008496.1 |
| <i>Leuconostoc mesenteroides</i> subsp. <i>mesenteroides</i> J18                       | NC_016805.1 |
| <i>Leuconostoc mesenteroides</i> subsp. <i>mesenteroides</i> J18, plasmid pKLE01       | NC_016827.1 |
| <i>Leuconostoc mesenteroides</i> subsp. <i>mesenteroides</i> J18, plasmid pKLE02       | NC_016820.1 |
| <i>Leuconostoc mesenteroides</i> subsp. <i>mesenteroides</i> J18, plasmid pKLE03       | NC_016821.1 |
| <i>Leuconostoc mesenteroides</i> subsp. <i>mesenteroides</i> J18, plasmid pKLE04       | NC_016828.1 |
| <i>Leuconostoc mesenteroides</i> subsp. <i>mesenteroides</i> J18, plasmid pKLE05       | NC_016806.1 |
| <i>Leuconostoc</i> sp. C2                                                              | NC_015734.1 |
| <i>Pantoea ananatis</i> LMG 20103                                                      | NC_013956.2 |
| <i>Pantoea</i> sp. At-9b                                                               | NC_014837.1 |
| <i>Pantoea</i> sp. At-9b, plasmid pPAT9B01                                             | NC_014838.1 |
| <i>Pantoea</i> sp. At-9b, plasmid pPAT9B02                                             | NC_014839.1 |
| <i>Pantoea</i> sp. At-9b, plasmid pPAT9B03                                             | NC_014840.1 |
| <i>Pantoea</i> sp. At-9b, plasmid pPAT9B04                                             | NC_014841.1 |
| <i>Pantoea</i> sp. At-9b, plasmid pPAT9B05                                             | NC_014842.1 |
| <i>Pediococcus claussenii</i> ATCC BAA-344                                             | NC_016605.1 |
| <i>Pediococcus claussenii</i> ATCC BAA-344, plasmid pPECL-1                            | NC_016635.1 |
| <i>Pediococcus claussenii</i> ATCC BAA-344, plasmid pPECL-2                            | NC_016606.1 |
| <i>Pediococcus claussenii</i> ATCC BAA-344, plasmid pPECL-3                            | NC_016636.1 |
| <i>Pediococcus claussenii</i> ATCC BAA-344, plasmid pPECL-4                            | NC_016607.1 |
| <i>Pediococcus claussenii</i> ATCC BAA-344, plasmid pPECL-5                            | NC_016608.1 |
| <i>Pediococcus claussenii</i> ATCC BAA-344, plasmid pPECL-6                            | NC_017017.1 |
| <i>Pediococcus claussenii</i> ATCC BAA-344, plasmid pPECL-7                            | NC_017018.1 |
| <i>Pediococcus claussenii</i> ATCC BAA-344, plasmid pPECL-8                            | NC_017019.1 |
| <i>Pediococcus pentosaceus</i> ATCC 25745                                              | NC_008525.1 |

---



---

|                                                                           |             |
|---------------------------------------------------------------------------|-------------|
| <i>Pediococcus pentosaceus</i> SL4                                        | NC_022780.1 |
| <i>Propionibacterium acnes</i> KPA17120                                   | NC_006085.1 |
| <i>Propionibacterium freudenreichii</i> subsp. <i>shermanii</i> CIRM-BIA1 | NC_014215.1 |
| <i>Pseudomonas putida</i> GB-1                                            | NC_010322.1 |
| <i>Pseudomonas putida</i> KT2440                                          | NC_002947.3 |
| <i>Psychrobacter arcticus</i> 273-4                                       | NC_007204.1 |
| <i>Psychrobacter cryohalolentis</i> K5                                    | NC_007969.1 |
| <i>Psychrobacter cryohalolentis</i> K5, plasmid 1                         | NC_007968.1 |
| <i>Psychrobacter</i> sp. PRwf-1                                           | NC_009524.1 |
| <i>Psychrobacter</i> sp. PRwf-1, plasmid pRWF101                          | NC_009516.1 |
| <i>Psychrobacter</i> sp. PRwf-1, plasmid pRWF102                          | NC_009517.1 |
| <i>Rahnella aquatilis</i> ATCC 33071                                      | NC_016818.1 |
| <i>Rahnella aquatilis</i> ATCC 33071, plasmid                             | NC_016819.1 |
| <i>Rahnella aquatilis</i> ATCC 33071, plasmid                             | NC_016835.1 |
| <i>Rahnella aquatilis</i> ATCC 33071, plasmid                             | NC_017092.1 |
| <i>Ralstonia solanacearum</i> Po82                                        | NC_017574.1 |
| <i>Ralstonia solanacearum</i> Po82, megaplasmid                           | NC_017575.1 |
| <i>Serratia proteamaculans</i> 568                                        | NC_009832.1 |
| <i>Serratia proteamaculans</i> 568, plasmid pSPRO01                       | NC_009829.1 |
| <i>Shewanella denitrificans</i> OS217                                     | NC_007954.1 |
| <i>Shewanella frigidimarina</i> NCIMB 400                                 | NC_008345.1 |
| <i>Shewanella oneidensis</i> MR-1                                         | NC_004347.2 |
| <i>Shewanella oneidensis</i> MR-1, plasmid                                | NC_004349.1 |
| <i>Shewanella piezotolerans</i> WP3                                       | NC_011566.1 |
| <i>Shewanella putrefaciens</i> CN-32                                      | NC_009438.1 |
| <i>Shewanella</i> sp. ANA-3                                               | NC_008577.1 |
| <i>Shewanella</i> sp. ANA-3, plasmid 1                                    | NC_008573.1 |
| <i>Shigella flexneri</i> 2°                                               | NC_004337.2 |
| <i>Shigella flexneri</i> 2a, plasmid pCP301                               | NC_004851.1 |
| <i>Staphylococcus haemolyticus</i> JCSC1435                               | NC_007168.1 |
| <i>Staphylococcus haemolyticus</i> JCSC1435, plasmid pSHaeA               | NC_007169.1 |
| <i>Staphylococcus haemolyticus</i> JCSC1435, plasmid pSHaeB               | NC_007170.1 |
| <i>Staphylococcus haemolyticus</i> JCSC1435, plasmid pSHaeC               | NC_007171.1 |
| <i>Staphylococcus pseudintermedius</i> ED99                               | NC_017568.1 |
| <i>Staphylococcus aureus</i> subsp. <i>aureus</i> NCTC 8325               | NC_007795.1 |

---

---

|                                                                        |             |
|------------------------------------------------------------------------|-------------|
| <i>Staphylococcus carnosus</i> subsp. <i>carnosus</i> TM300            | NC_012121.1 |
| <i>Streptococcus agalactiae</i> NEM316                                 | NC_004368.1 |
| <i>Streptococcus dysgalactiae</i> subsp. <i>equisimilis</i> ATCC 12394 | NC_017567.1 |
| <i>Streptococcus macedonicus</i> ACA-DC 198                            | NC_016749.1 |
| <i>Streptococcus macedonicus</i> ACA-DC 198, plasmid pSMA198           | NC_016750.1 |
| <i>Streptococcus mitis</i> B6                                          | NC_013853.1 |
| <i>Streptococcus oralis</i> Uo5                                        | NC_015291.1 |
| <i>Streptococcus pneumoniae</i> R6                                     | NC_003098.1 |
| <i>Streptococcus pneumoniae</i> TIGR4                                  | NC_003028.3 |
| <i>Streptococcus pyogenes</i> SF370                                    | NC_002737.1 |
| <i>Streptococcus salivarius</i> 57.I                                   | NC_017594.1 |
| <i>Streptococcus suis</i> 05ZYH33                                      | NC_009442.1 |
| <i>Streptococcus thermophilus</i> CNRZ1066                             | NC_006449.1 |
| <i>Streptococcus thermophilus</i> JIM 8232                             | NC_017581.1 |
| <i>Streptococcus thermophilus</i> LMD-9                                | NC_008532.1 |
| <i>Streptococcus thermophilus</i> LMD-9, plasmid 1                     | NC_008500.1 |
| <i>Streptococcus thermophilus</i> LMD-9, plasmid 2                     | NC_008501.1 |
| <i>Streptococcus thermophilus</i> LMG18311                             | NC_006448.1 |
| <i>Streptococcus thermophilus</i> MN-ZLW-002                           | NC_017927.1 |
| <i>Streptococcus thermophilus</i> ND03                                 | NC_017563.1 |
| <i>Streptococcus uberis</i> 0140J                                      | NC_012004.1 |

---

**downloaded from <http://patricbrc.org/portal/>**

---

|                                          |    |
|------------------------------------------|----|
| <i>Enterococcus casseliflavus</i> EC20   | NA |
| <i>Enterococcus gallinarum</i> EG2       | NA |
| <i>Lactobacillus reuteri</i> 100-23      | NA |
| <i>Pediococcus acidilactici</i> DSM20284 | NA |

---
